# Supplementary material for: Photolabile acetals as profragrances: the effect of structural modifications on the light-induced release of volatile aldehydes on cotton
Source: Royal Society of Chemistry journal article supplement (doi:10.1039/c6pp00206d), 2016-08-11
Supplement: c6pp00206d1.pdf [file c6pp00206d1.pdf]

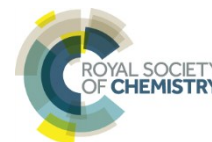

## Photochemical & Photobiological Sciences

### Electronic Supplementary Information (ESI)

#### Photolabile acetals as profragrances: the effect of structural modifications on the light-induced release of volatile aldehydes on cotton

Alain Trachsel, Barbara Buchs and Andreas Herrmann\*

[www.rsc.org/pps](http://www.rsc.org/pps)

Firmenich SA, Division Recherche et Développement, Route des Jeunes 1, B. P. 239, CH-1211 Genève 8, Switzerland.  
E-mail: andreas.herrmann@firmenich.com

#### General

##### Instrumentation for the spectroscopic characterisation of compounds

Nuclear magnetic resonance (NMR) spectra were measured on Bruker Avance III 400, 500 or 600 spectrometers; the chemical displacements  $\delta$  are indicated in ppm with respect to  $\text{Si}(\text{CH}_3)_4$  (TMS) as the internal standard. Multiplets indicated together with the chemical shifts obtained from decoupled  $^{13}\text{C}$  NMR spectra were determined by distortionless enhancement of polarization transfer (DEPT) measurements; two sets of spectra (DEPT-90 and DEPT-135, data not shown) were systematically recorded. Ultraviolet/Visible (UV/Vis) absorption spectra were measured on a Perkin Elmer Lambda 14 spectrometer, with  $\lambda$  indicated in nm ( $\varepsilon$  in  $\text{L mol}^{-1} \text{cm}^{-1}$ ) and sh = shoulder. Infrared (IR) spectra were measured on a Perkin Elmer 1600 FTIR spectrometer, with  $\tilde{\nu}_{\text{max}}$  given in  $\text{cm}^{-1}$  and the intensities of the IR bands indicated as strong (*s*), medium (*m*) or weak (*w*) and br. = broad band. High resolution mass spectra (HRMS) were recorded on a Waters Acquity I-Class ultra-performance liquid chromatography (UPLC) system composed of a binary solvent manager (UPIBSM), a sample manager with fixed loop (UPISMFL, 10  $\mu\text{L}$ ), a column manager (UPCMA) and a PDA detector (UPPDATC). Samples were eluted at 0.5  $\text{mL min}^{-1}$  from a Waters Acquity UPLC<sup>®</sup> BEH C18 column (1.7  $\mu\text{m}$ , 50 mm  $\times$  2.1 mm inner diameter), thermostatted at  $30.0^\circ\text{C} \pm 0.1^\circ\text{C}$ , with a gradient of water/acetonitrile (both containing 0.1% of formic acid) at 98:2 for 1 min, then to 0:100 in 5 min. Electrospray ionisation (ESI) mass spectra were recorded on a Thermo Fisher Scientific Q-Exactive system (0726020) equipped with an H-ESI probe source in the full scan mode ( $m/z$  from 100 to 1500) with the H-ESI probe source in the positive or negative mode, depending on the ionization potential of the molecule, and at a spray voltage of 3500 V with a resolution of 70'000. Direct solvent injections were performed at a flow rate of 0.5  $\text{mL min}^{-1}$  with acetonitrile (containing 0.1% of formic acid) for 5 min, using the same setup of the Q-Exactive system.

##### Instrumentation and conditions for dynamic headspace analysis

Tenax<sup>®</sup> cartridges (each filled with 100 mg of Tenax<sup>®</sup> TA [= poly(2,6-diphenyl-*p*-phenylene oxide)] adsorbent resin) were thermally desorbed on a Perkin Elmer TurboMatrix ATD desorber, connected to an Agilent Technologies 7890A gas chromatograph (GC) equipped with a HP-1 capillary column (30 m, 0.32 mm inner diameter, film thickness 0.25  $\mu\text{m}$ ) and a flame ionisation detector. The volatiles were eluted with a one-step temperature gradient from  $60^\circ\text{C}$  to  $200^\circ\text{C}$  at  $15^\circ\text{C min}^{-1}$  using He as the carrier gas. The thermodesorber was operated at a pressure of 70 kPa. Cartridges were heated at  $240^\circ\text{C}$  for 5 min. The volatiles were desorbed at 20  $\text{mL min}^{-1}$  and trapped at  $-30^\circ\text{C}$ . The trap was then heated to  $240^\circ\text{C}$  (at  $40^\circ\text{C s}^{-1}$ ) and held for 2 min. The transfer tube to the GC was heated at  $200^\circ\text{C}$  and an outlet split of 30  $\text{mL min}^{-1}$  was used.

Quantitative headspace concentrations (in  $\text{ng L}^{-1}$  of air) were determined by external standard calibration. Ethanol solutions (0.2  $\mu\text{L}$ ) of the aldehydes to be released at different concentrations were directly injected onto clean Tenax<sup>®</sup> cartridges, which were immediately desorbed and analysed as described above.

**Table S1** Dynamic headspace concentrations (with standard deviations) for the light-induced release of 10-undecenal from profragrances **1–12** and **25** as compared to unmodified 10-undecenal (reference) on dry cotton (indirect deposition) after line drying for 1 day (average values of at least two measurements)

| 10-Undecenal released from | Measured headspace concentrations of 10-undecenal with standard deviations (in parentheses) [ng L <sup>-1</sup> of air] on dry cotton after drying for 1 day and sampling for |                |                |                |                |                |
|----------------------------|-------------------------------------------------------------------------------------------------------------------------------------------------------------------------------|----------------|----------------|----------------|----------------|----------------|
|                            | 25 min                                                                                                                                                                        | 55 min         | 85 min         | 115 min        | 145 min        | 175 min        |
| <b>1a</b>                  | 2.5 (±3.2)                                                                                                                                                                    | 4.3 (±0.6)     | 5.2 (±2.3)     | 3.2 (±2.8)     | 4.7 (±0.4)     | 2.6 (±0.8)     |
| <b>2a</b>                  | 2.8 (±4.9)                                                                                                                                                                    | 2.5 (±2.6)     | 2.4 (±2.1)     | 3.0 (±2.3)     | 2.9 (±2.5)     | 2.4 (±1.6)     |
| <b>3a</b>                  | 4.2 (±2.5)                                                                                                                                                                    | 6.9 (±3.3)     | 8.9 (±3.1)     | 10.8 (±4.4)    | 12.0 (±4.2)    | 11.2 (±2.8)    |
| <b>4a</b>                  | 545.3 (±296.4)                                                                                                                                                                | 837.1 (±340.4) | 854.9 (±263.5) | 849.6 (±317.7) | 750.6 (±359.6) | 650.1 (±387.2) |
| <b>5a</b>                  | 325.3 (±25.5)                                                                                                                                                                 | 477.0 (±18.4)  | 515.1 (±9.1)   | 458.6 (±54.2)  | 416.6 (±92.4)  | 344.7 (±64.3)  |
| <b>6a</b>                  | 250.8 (±72.4)                                                                                                                                                                 | 403.1 (±69.3)  | 413.2 (±14.7)  | 399.4 (±3.9)   | 366.0 (±3.5)   | 345.9 (±23.4)  |
| <b>7a</b>                  | 294.0 (±109.3)                                                                                                                                                                | 520.0 (±100.5) | 587.6 (±56.8)  | 524.2 (±12.1)  | 466.4 (±44.9)  | 397.6 (±54.1)  |
| <b>8a</b>                  | 10.7 (±2.8)                                                                                                                                                                   | 20.9 (±4.5)    | 19.5 (±13.7)   | 24.5 (±6.0)    | 25.8 (±0.1)    | 21.6 (±1.2)    |
| <b>9a</b>                  | 27.3 (±41.7)                                                                                                                                                                  | 122.5 (±97.2)  | 161.9 (±115.2) | 181.4 (±131.6) | 188.9 (±124.4) | 186.7 (±121.5) |
| <b>10a</b>                 | 74.8 (±54.1)                                                                                                                                                                  | 129.7 (±87.5)  | 141.6 (±78.3)  | 133.7 (±63.3)  | 123.5 (±44.7)  | 111.4 (±32.0)  |
| <b>11a</b>                 | 7.5 (±8.2)                                                                                                                                                                    | 10.8 (±5.3)    | 12.5 (±8.7)    | 14.9 (±10.0)   | 16.1 (±11.5)   | 14.9 (±11.3)   |
| <b>12a</b>                 | 79.2 (±68.6)                                                                                                                                                                  | 148.8 (±118.0) | 191.3 (±138.3) | 186.1 (±112.8) | 187.9 (±107.2) | 205.4 (±128.4) |
| <b>25</b>                  | 148.1 (±23.9)                                                                                                                                                                 | 235.9 (±43.9)  | 227.6 (±34.1)  | 217.2 (±14.5)  | 252.3 (±22.6)  | 172.4 (±21.5)  |
| Reference                  | 2.9 (±2.7)                                                                                                                                                                    | 5.5 (±4.8)     | 7.6 (±5.6)     | 9.1 (±7.6)     | 8.6 (±5.2)     | 9.4 (±6.2)     |

**Table S2** Amount of remaining acetal (**7a–12a**) or 2-oxo-2-phenylacetate (**25**) after photoirradiation in undegassed deuterated acetonitrile with a xenon lamp. Data from quantitative <sup>1</sup>H NMR analysis based on the disappearance of the proton at C(2) using DMSO as the internal standard.

| Irradiated compound | Amount of remaining profragrance <sup>a</sup> after photoirradiation for |        |        |         |         |
|---------------------|--------------------------------------------------------------------------|--------|--------|---------|---------|
|                     | 30 min                                                                   | 60 min | 90 min | 120 min | 150 min |
| <b>7a</b>           | 55.2%                                                                    | 34.2%  | 22.3%  | 12.0%   | 11.3%   |
| <b>8a</b>           | 96.4%                                                                    | 92.4%  | 89.4%  | 87.9%   | 87.6%   |
| <b>9a</b>           | 88.8%                                                                    | 80.6%  | 72.6%  | 66.3%   | 61.9%   |
| <b>10a</b>          | 98.5%                                                                    | 95.7%  | 94.0%  | 88.8%   | 87.2%   |
| <b>11a</b>          | 98.7%                                                                    | 98.1%  | 96.5%  | 93.8%   | 90.3%   |
| <b>12a</b>          | 87.6%                                                                    | 79.5%  | 70.0%  | 62.7%   | 56.7%   |
| <b>25</b>           | 23.9%                                                                    | 3.8%   | 0.0%   | 0.0%    | 0.1%    |

<sup>a</sup> the <sup>1</sup>H NMR spectrum recorded before irradiation was taken as corresponding to 100%.

**Table S3** Dynamic headspace concentrations (with standard deviations) for the light-induced release of (±)-6-methoxy-2,6-dimethylheptanal from profragrances **2b–4b**, of (±)-3-phenylbutanal from profragrances **3c** and **4c** and of (±)-3,5,5-trimethylhexanal from profragrance **4d** as compared to the corresponding unmodified reference aldehyde on dry cotton (indirect deposition) after line drying for 1 day (average values of at least two measurements)

| (±)-6-methoxy-2,6-dimethylheptanal released from | Measured headspace concentrations of (±)-6-methoxy-2,6-dimethylheptanal with standard deviations (in parentheses) [ng L <sup>-1</sup> of air] on dry cotton after drying for 1 day and sampling for |                  |                  |                  |                  |                  |
|--------------------------------------------------|-----------------------------------------------------------------------------------------------------------------------------------------------------------------------------------------------------|------------------|------------------|------------------|------------------|------------------|
|                                                  | 25 min                                                                                                                                                                                              | 55 min           | 85 min           | 115 min          | 145 min          | 175 min          |
| <b>2b</b>                                        | 3.1 <sup>a</sup>                                                                                                                                                                                    | 4.5 <sup>a</sup> | 4.7 <sup>a</sup> | 4.3 <sup>a</sup> | 4.2 <sup>a</sup> | 3.9 <sup>a</sup> |
| <b>3b</b>                                        | 12.2 (±6.7)                                                                                                                                                                                         | 19.6 (±11.4)     | 21.1 (±10.4)     | 23.0 (±11.3)     | 23.7 (±11.0)     | 24.4 (±11.9)     |
| <b>4b</b>                                        | 311.2 (±123.2)                                                                                                                                                                                      | 342.9 (±89.6)    | 275.1 (±54.0)    | 232.1 (±41.1)    | 196.6 (±30.5)    | 149.4 (±33.4)    |
| Reference                                        | 0.9 (±0.9)                                                                                                                                                                                          | 1.7 (±1.7)       | 2.1 (±2.2)       | 2.1 (±2.2)       | 2.0 (±2.1)       | 1.7 (±1.9)       |
| (±)-3-phenylbutanal released from                | Measured headspace concentrations of (±)-3-phenylbutanal with standard deviations (in parentheses) [ng L <sup>-1</sup> of air] on dry cotton after drying for 1 day and sampling for                |                  |                  |                  |                  |                  |
|                                                  | 25 min                                                                                                                                                                                              | 55 min           | 85 min           | 115 min          | 145 min          | 175 min          |
| <b>3c</b>                                        | 0.9 (±0.0)                                                                                                                                                                                          | 2.1 (±1.4)       | 3.0 (±1.4)       | 3.6 (±1.5)       | 4.4 (±2.0)       | 4.7 (±1.6)       |
| <b>4c</b>                                        | 121.9 (±48.1)                                                                                                                                                                                       | 159.4 (±62.0)    | 148.1 (±63.3)    | 128.0 (±47.5)    | 109.3 (±36.5)    | 90.8 (±30.0)     |
| Reference                                        | 2.0 (±1.3)                                                                                                                                                                                          | 2.9 (±1.5)       | 3.5 (±1.8)       | 3.9 (±1.9)       | 4.0 (±2.2)       | 3.9 (±2.0)       |
| (±)-3,5,5-trimethylhexanal released from         | Measured headspace concentrations of (±)-3,5,5-trimethylhexanal with standard deviations (in parentheses) [ng L <sup>-1</sup> of air] on dry cotton after drying for 1 day and sampling for         |                  |                  |                  |                  |                  |
|                                                  | 25 min                                                                                                                                                                                              | 55 min           | 85 min           | 115 min          | 145 min          | 175 min          |
| <b>4d</b>                                        | 1038.5 (±118.4)                                                                                                                                                                                     | 579.5 (±37.7)    | 415.6 (±8.4)     | 327.9 (±37.9)    | 279.7 (±25.6)    | 237.0 (±27.4)    |
| Reference                                        | 1.6 (±0.1)                                                                                                                                                                                          | 2.8 (±0.4)       | 2.8 (±0.5)       | 3.2 (±0.1)       | 3.6 (±0.4)       | 5.0 (±2.8)       |

<sup>a</sup> single measurement.**Table S4** Dynamic headspace concentrations (with standard deviations) for the light-induced release of 10-undecenal from profragrances **1a–12a** and **25** as compared to unmodified 10-undecenal (reference) on dry cotton (direct deposition) after line drying for 1 day (average values of at least two measurements)

| 10-Undecenal released from | Measured headspace concentrations of 10-undecenal with standard deviations (in parentheses) [ng L <sup>-1</sup> of air] on dry cotton after drying for 1 day and sampling for |                  |                  |                   |                  |                  |
|----------------------------|-------------------------------------------------------------------------------------------------------------------------------------------------------------------------------|------------------|------------------|-------------------|------------------|------------------|
|                            | 25 min                                                                                                                                                                        | 55 min           | 85 min           | 115 min           | 145 min          | 175 min          |
| <b>1a</b>                  | 7.5 (±9.0)                                                                                                                                                                    | 4.6 (±3.1)       | 4.6 (±1.5)       | 5.7 (±1.1)        | 6.0 (±1.2)       | 3.6 (±0.3)       |
| <b>2a</b>                  | 8.7 (±12.2)                                                                                                                                                                   | 24.4 (±0.7)      | 28.2 (±1.1)      | 29.1 (±2.1)       | 27.1 (±0.5)      | 25.6 (±0.2)      |
| <b>3a</b>                  | 13.7 (±10.1)                                                                                                                                                                  | 24.5 (±11.0)     | 41.3 (±5.8)      | 43.9 (±11.8)      | 49.2 (±10.4)     | 58.1 (±14.3)     |
| <b>4a</b>                  | 2998.5 (±1461.6)                                                                                                                                                              | 7561.4 (±3172.4) | 9888.8 (±3408.0) | 10041.6 (±2728.8) | 9447.3 (±1802.8) | 8790.0 (±1189.1) |
| <b>5a</b>                  | 2250.7 (±146.0)                                                                                                                                                               | 5441.9 (±540.9)  | 7230.6 (±90.3)   | 6123.9 (±980.4)   | 5268.1 (±1195.2) | 4722.4 (±1534.1) |
| <b>6a</b>                  | 1410.7 (±468.3)                                                                                                                                                               | 4286.7 (±437.0)  | 6363.7 (±469.7)  | 7364.9 (±202.2)   | 7491.0 (±150.8)  | 7483.5 (±487.3)  |
| <b>7a</b>                  | 3139.5 (±3073.9)                                                                                                                                                              | 6907.0 (±5089.9) | 8599.0 (±4504.5) | 9027.5 (±3784.6)  | 8541.9 (±2977.2) | 7349.8 (±2076.4) |
| <b>8a</b>                  | 74.6 (±16.1)                                                                                                                                                                  | 149.7 (±23.7)    | 206.9 (±6.6)     | 218.1 (±6.1)      | 226.3 (±17.4)    | 211.0 (±18.8)    |
| <b>9a</b>                  | 397.2 (±391.1)                                                                                                                                                                | 1108.0 (±980.6)  | 1396.0 (±1077.7) | 1696.4 (±1170.3)  | 1723.3 (±1070.7) | 1697.0 (±1000.8) |
| <b>10a</b>                 | 495.4 (±225.1)                                                                                                                                                                | 952.4 (±436.4)   | 1014.1 (±422.4)  | 910.4 (±294.1)    | 798.5 (±218.3)   | 724.3 (±148.6)   |
| <b>11a</b>                 | 18.7 (±6.1)                                                                                                                                                                   | 59.2 (±19.7)     | 92.4 (±38.4)     | 110.7 (±33.7)     | 107.3 (±28.9)    | 103.8 (±27.2)    |
| <b>12a</b>                 | 888.5 (±585.7)                                                                                                                                                                | 2153.2 (±1564.4) | 2558.2 (±1739.8) | 2496.6 (±1555.7)  | 2006.3 (±1875.0) | 1889.1 (±1686.8) |
| <b>25</b>                  | 772.8 (±64.8)                                                                                                                                                                 | 1108.7 (±69.4)   | 1169.0 (±106.4)  | 1078.9 (±137.4)   | 971.6 (±122.3)   | 894.0 (±72.1)    |
| Reference                  | 89.4 (±127.1)                                                                                                                                                                 | 207.5 (±326.5)   | 451.3 (±737.2)   | 623.2 (±960.1)    | 650.6 (±960.0)   | 603.9 (±866.7)   |

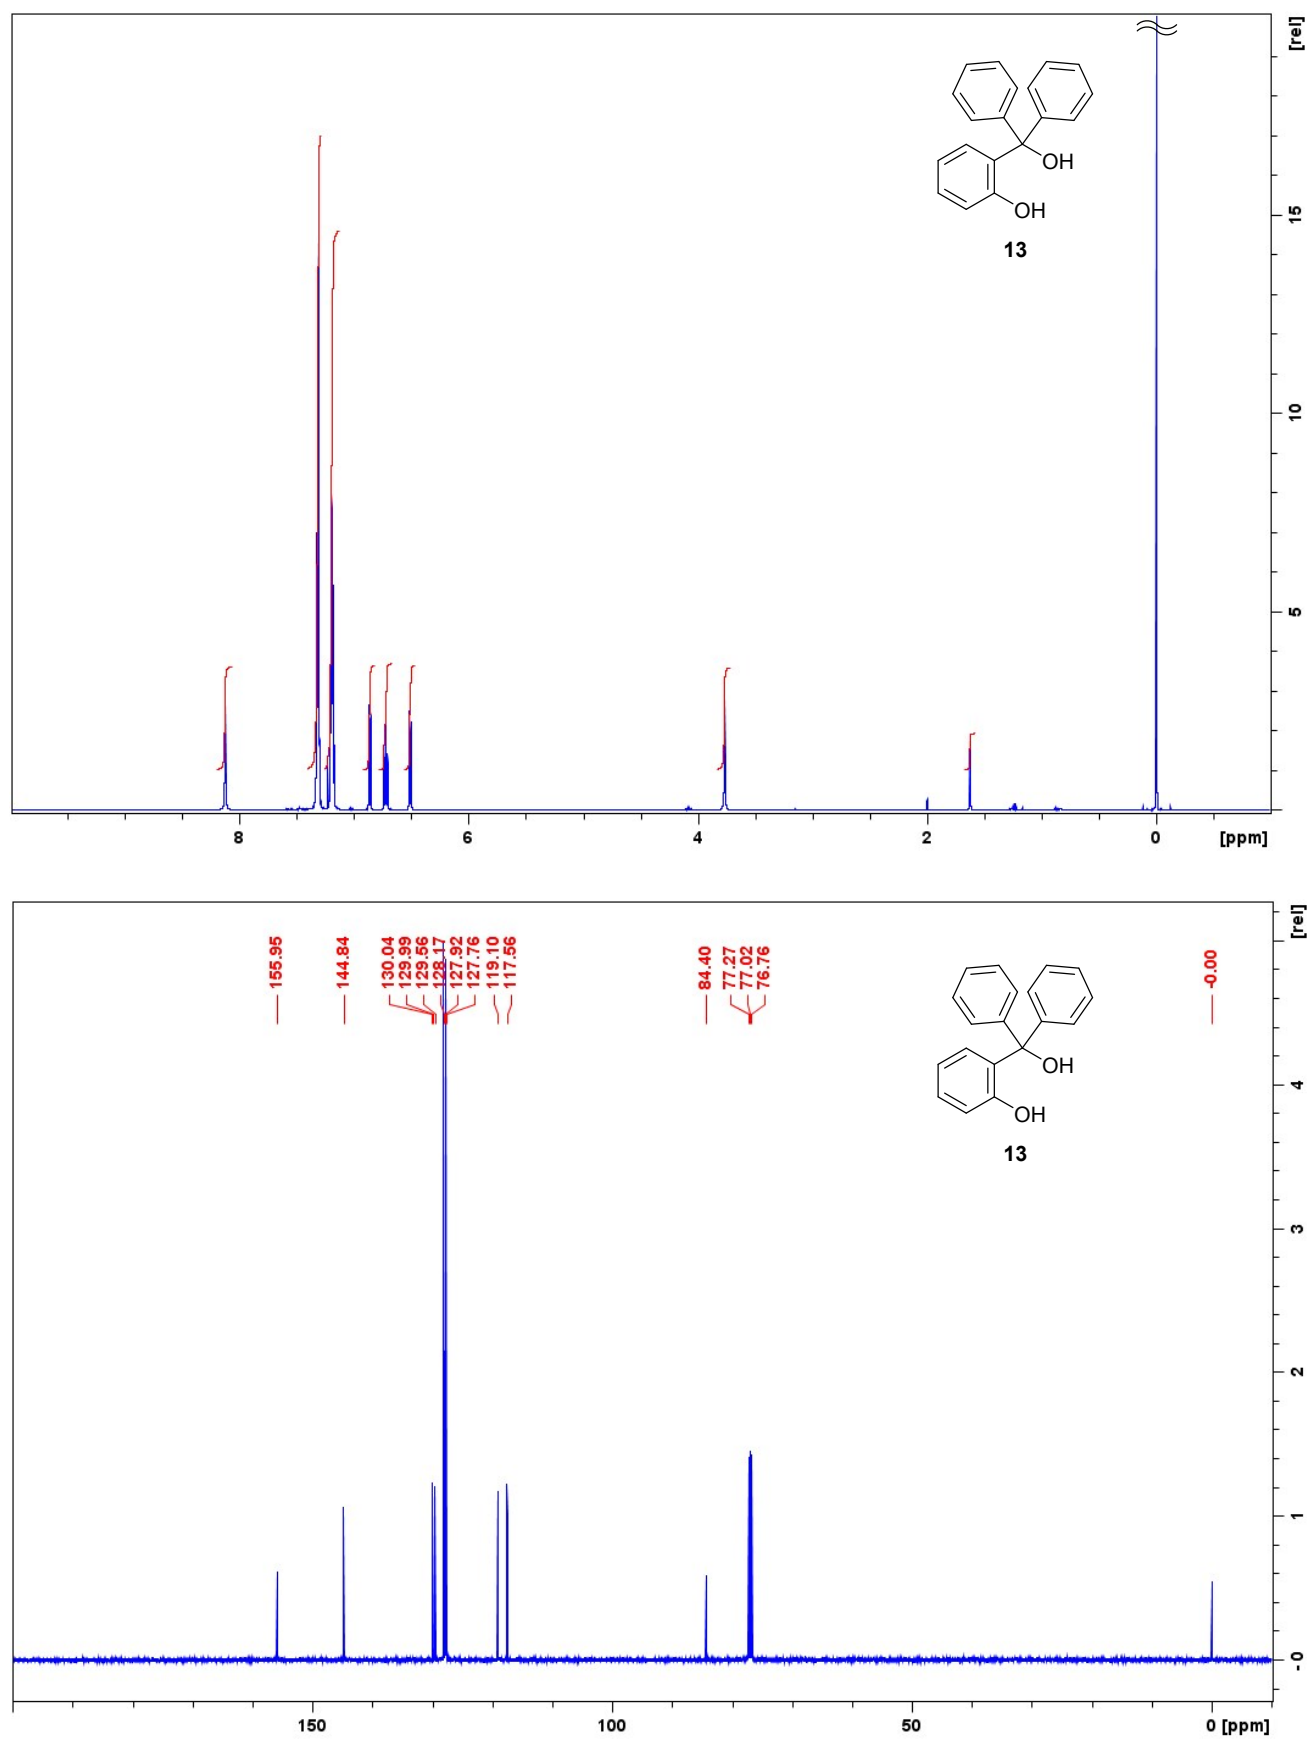

Fig. S1  $^1\text{H}$  (top) and  $^{13}\text{C}$  (bottom) NMR spectra of **13** in  $\text{CDCl}_3$ .

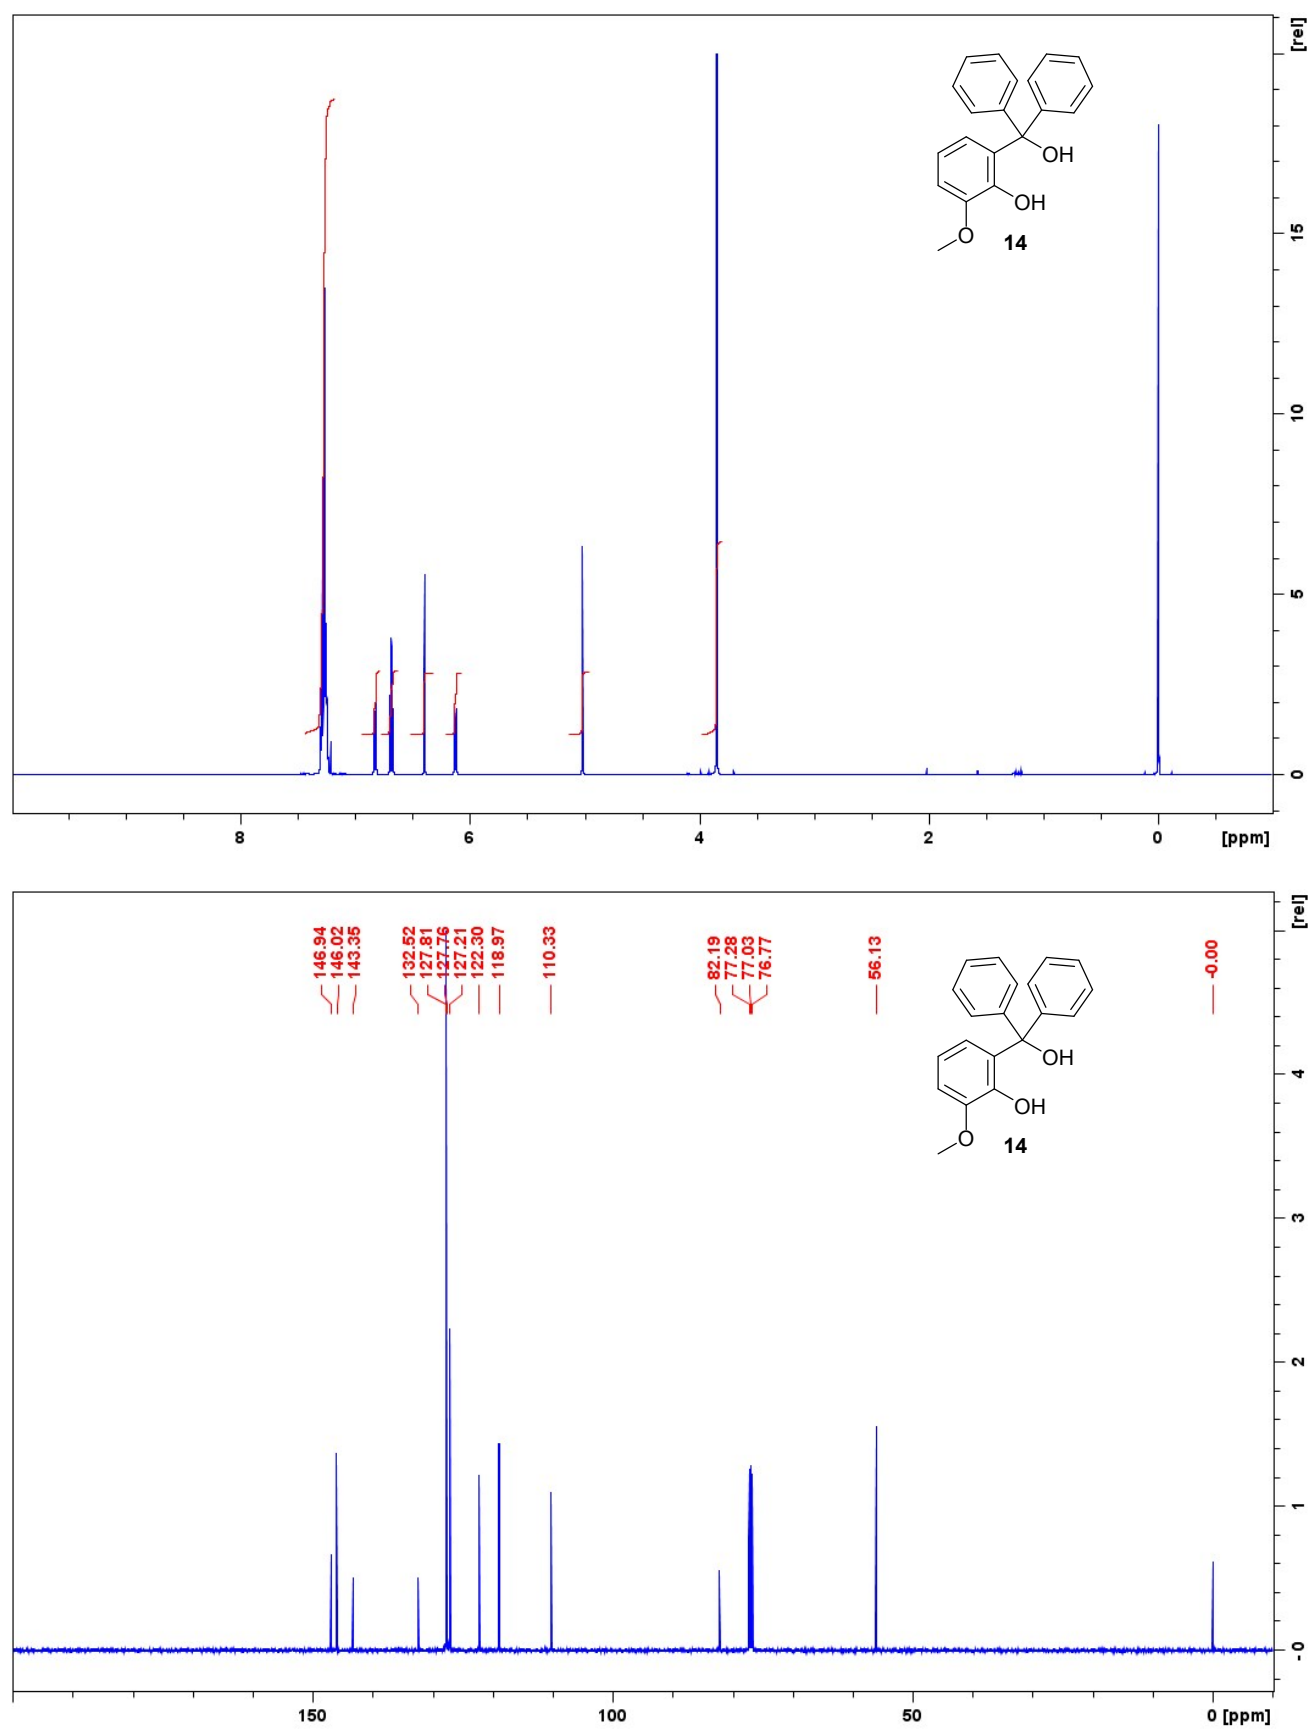

Fig. S2 <sup>1</sup>H (top) and <sup>13</sup>C (bottom) NMR spectra of **14** in CDCl<sub>3</sub>.

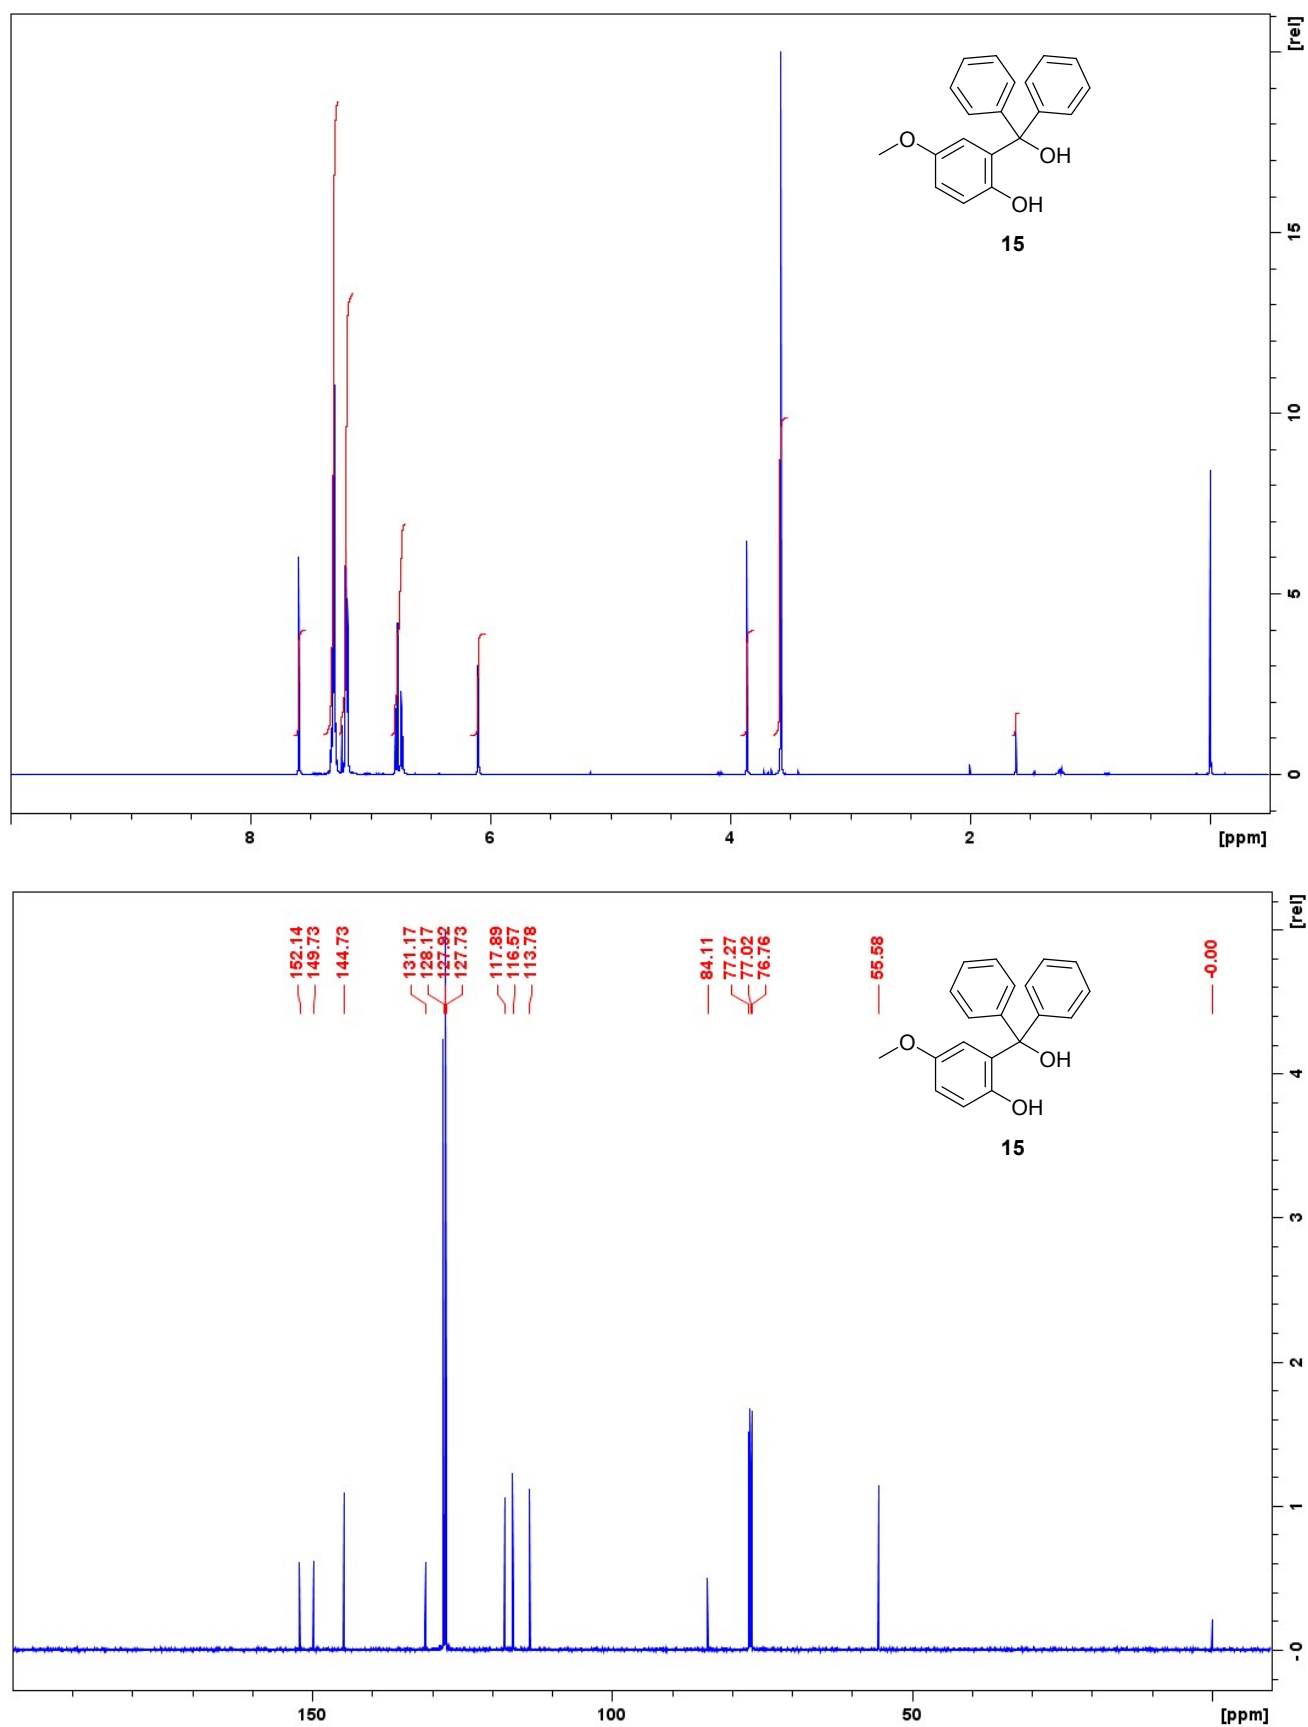

Fig. S3 <sup>1</sup>H (top) and <sup>13</sup>C (bottom) NMR spectra of **15** in CDCl<sub>3</sub>.

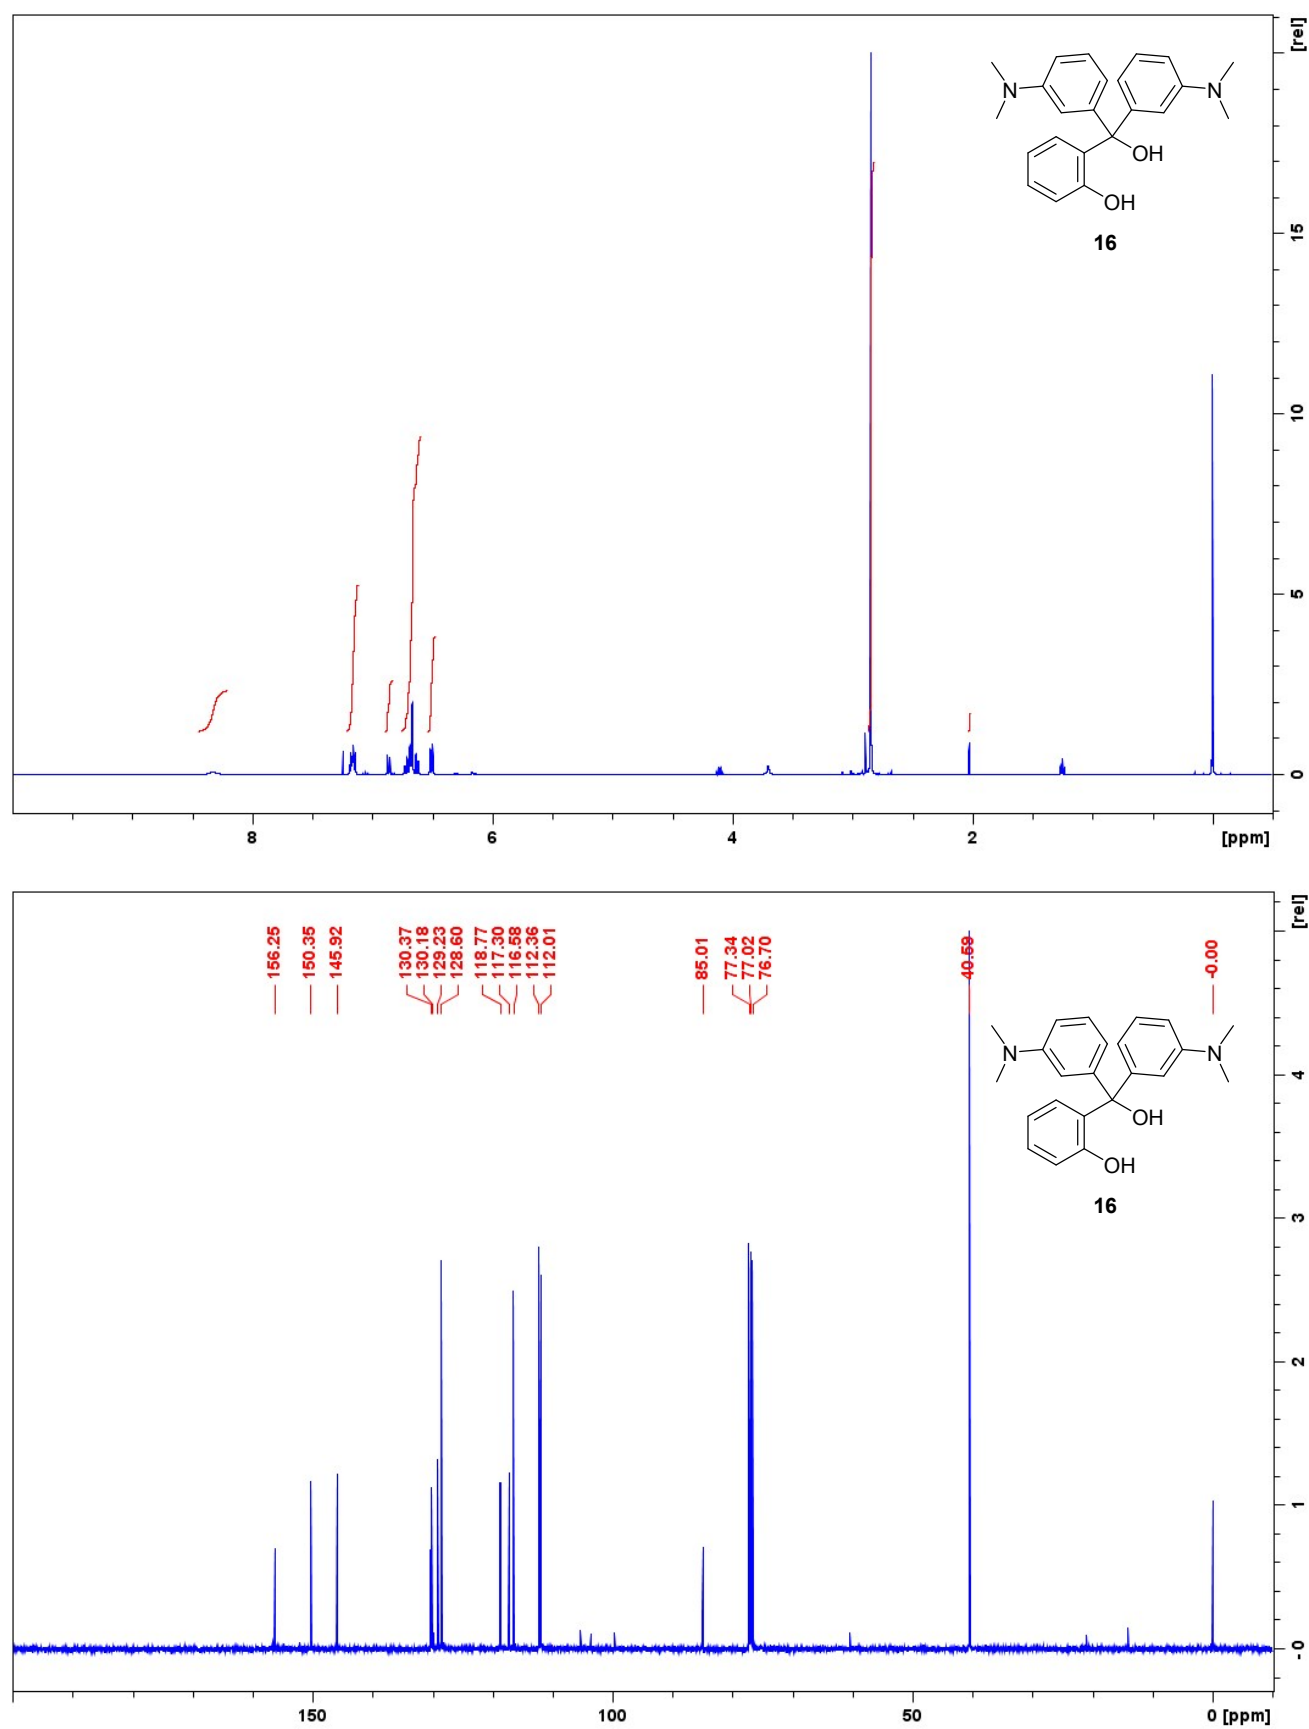

Fig. S4 <sup>1</sup>H (top) and <sup>13</sup>C (bottom) NMR spectra of **16** in CDCl<sub>3</sub>.

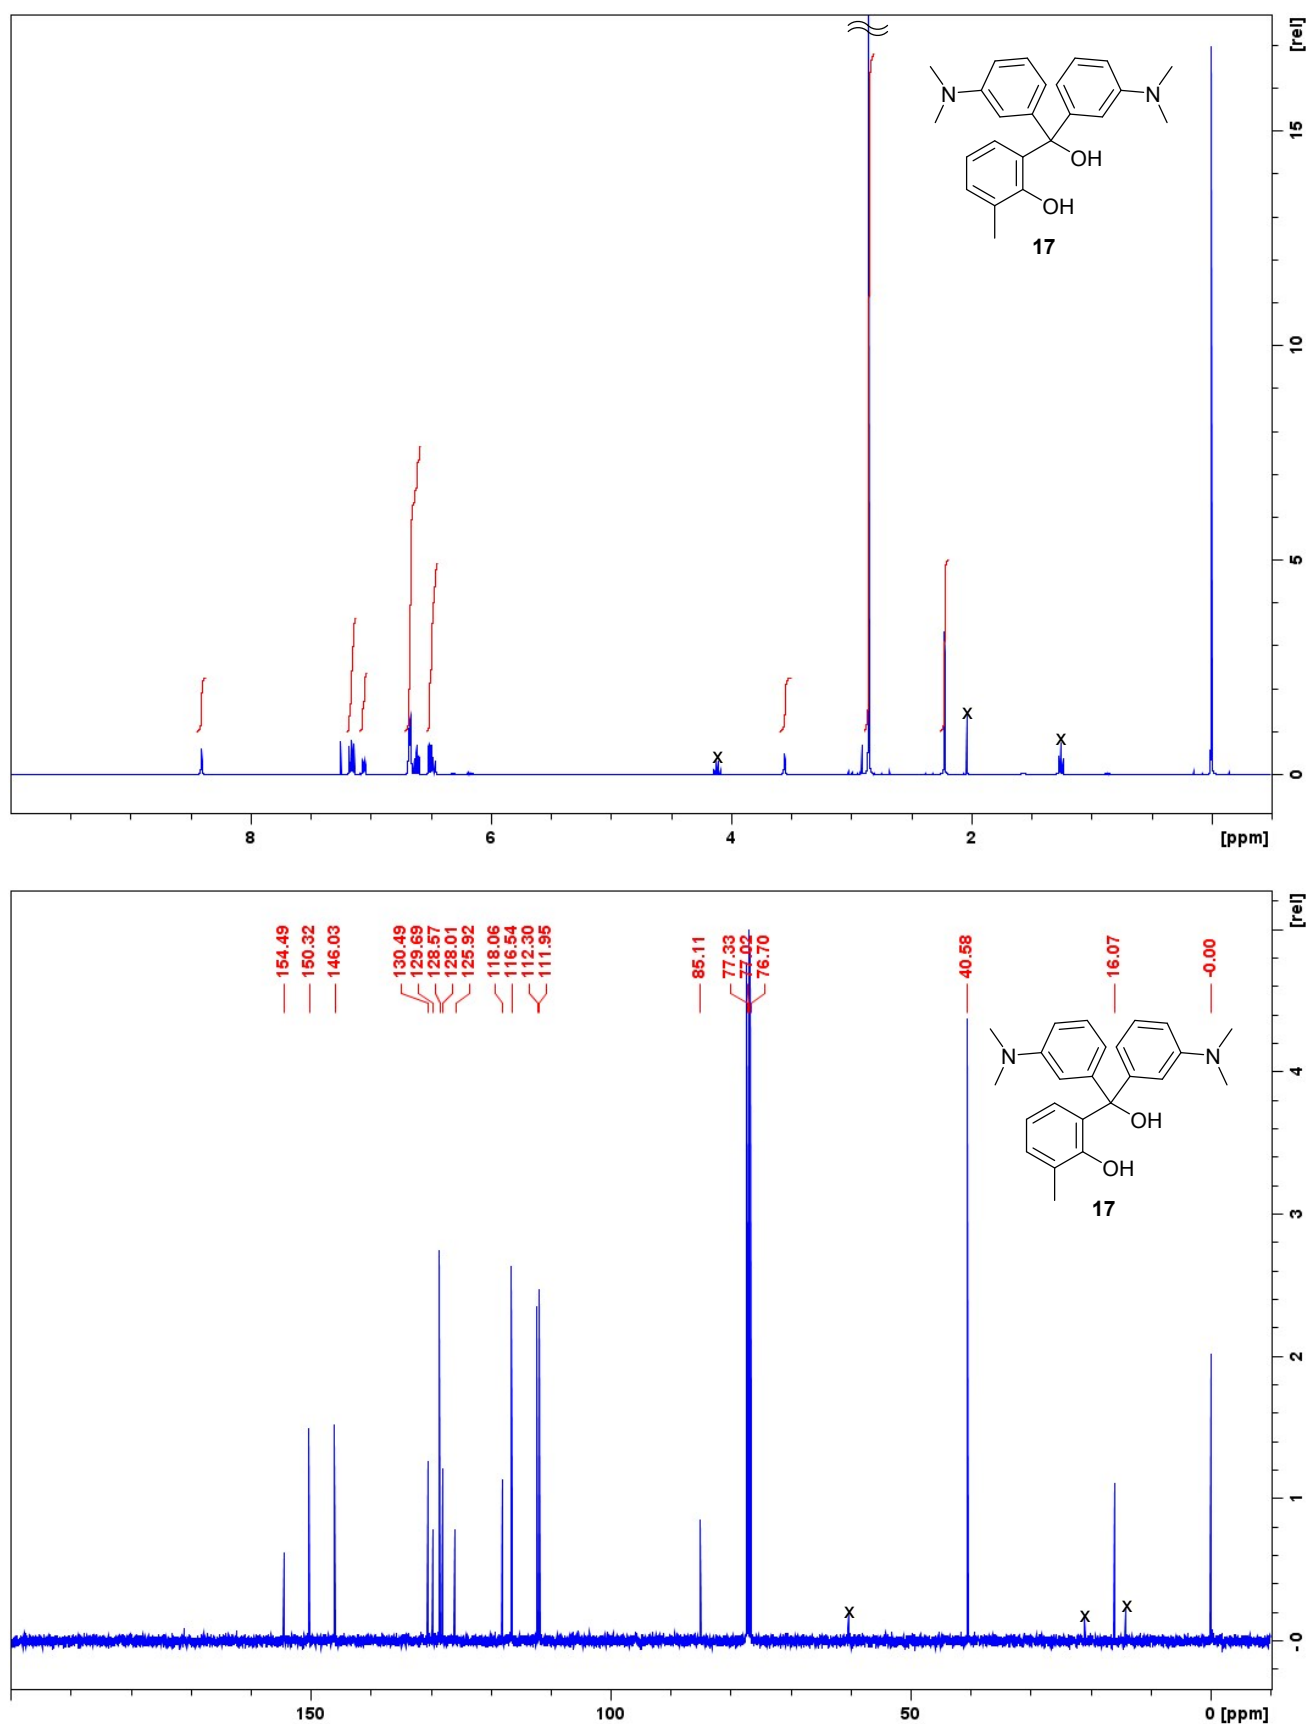

Fig. S5 <sup>1</sup>H (top) and <sup>13</sup>C (bottom) NMR spectra of **17** in CDCl<sub>3</sub> (x = AcOEt).



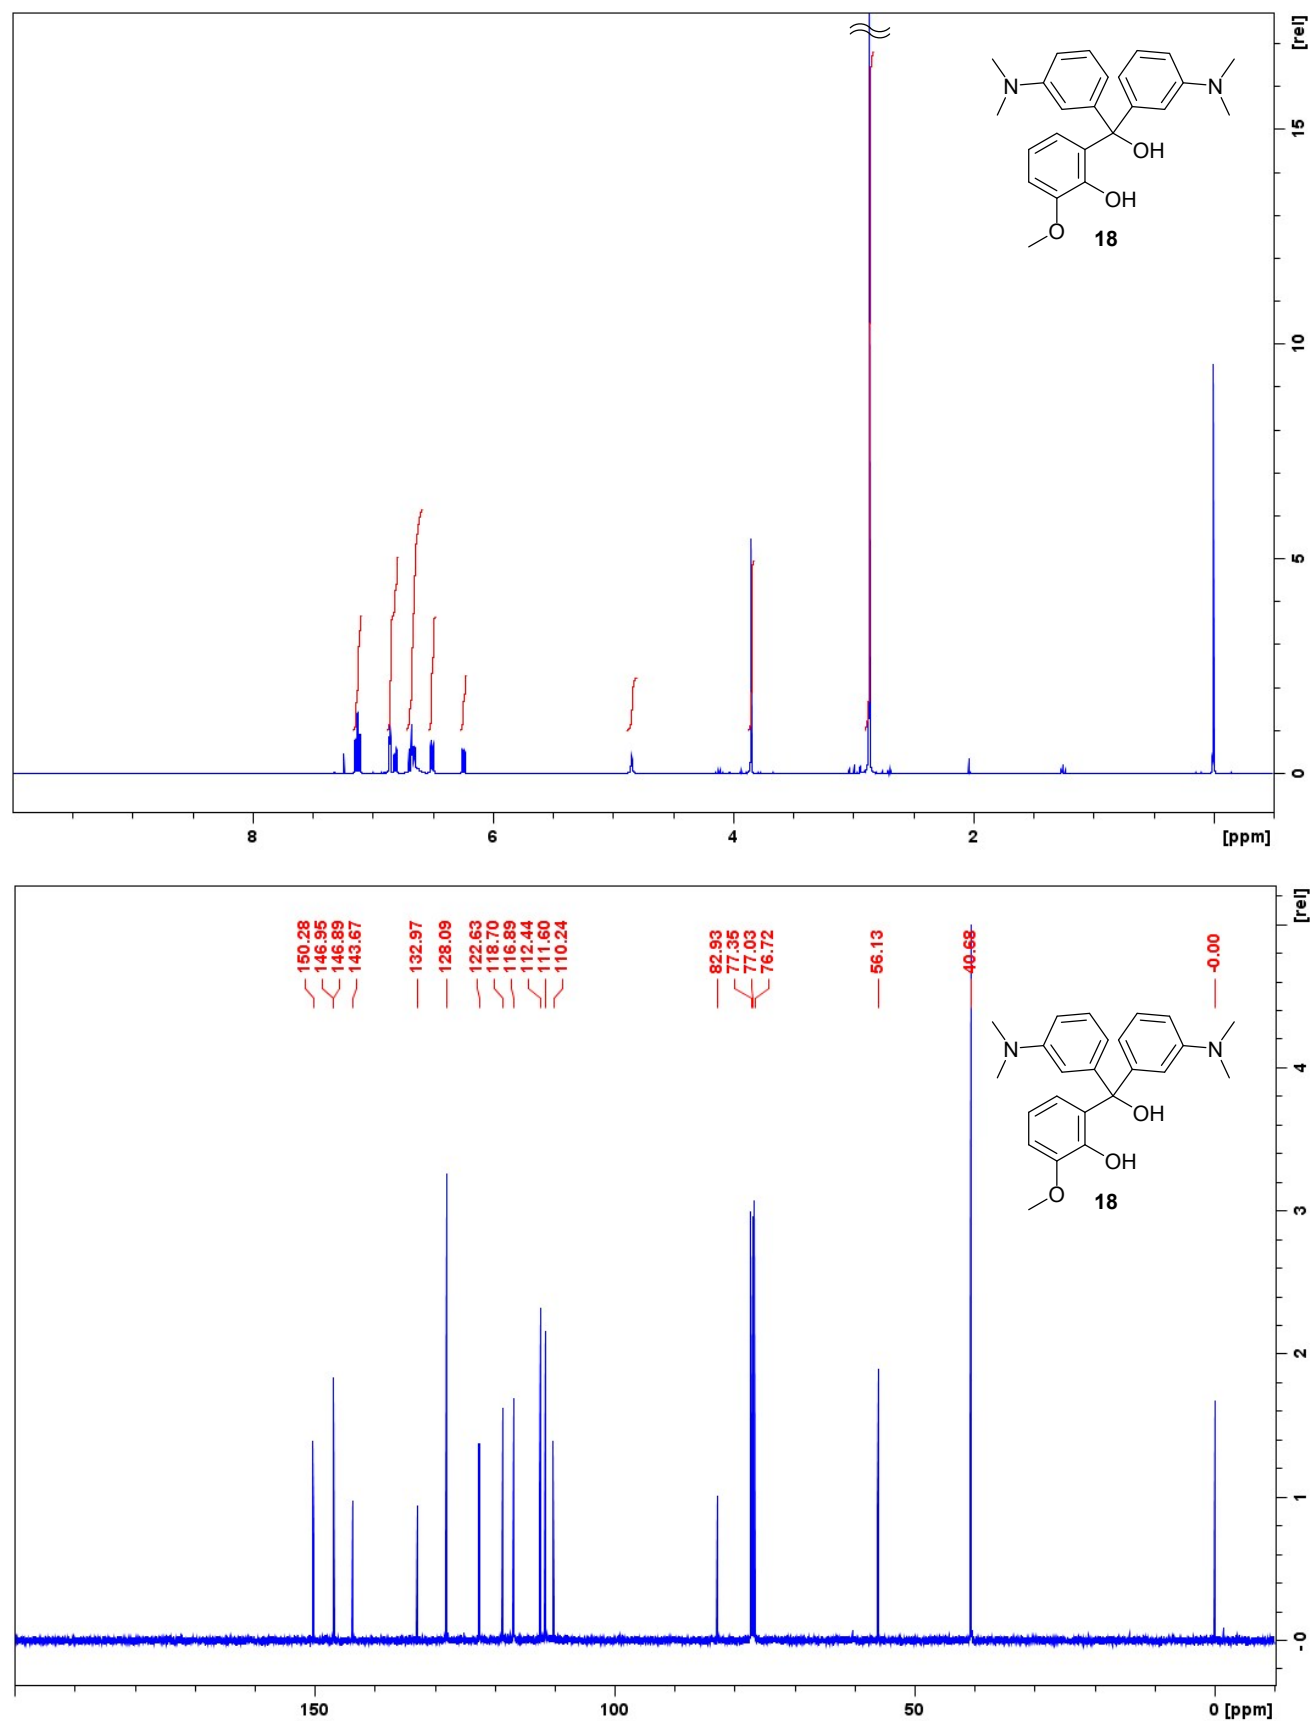

Fig. S6 <sup>1</sup>H (top) and <sup>13</sup>C (bottom) NMR spectra of **18** in CDCl<sub>3</sub>.

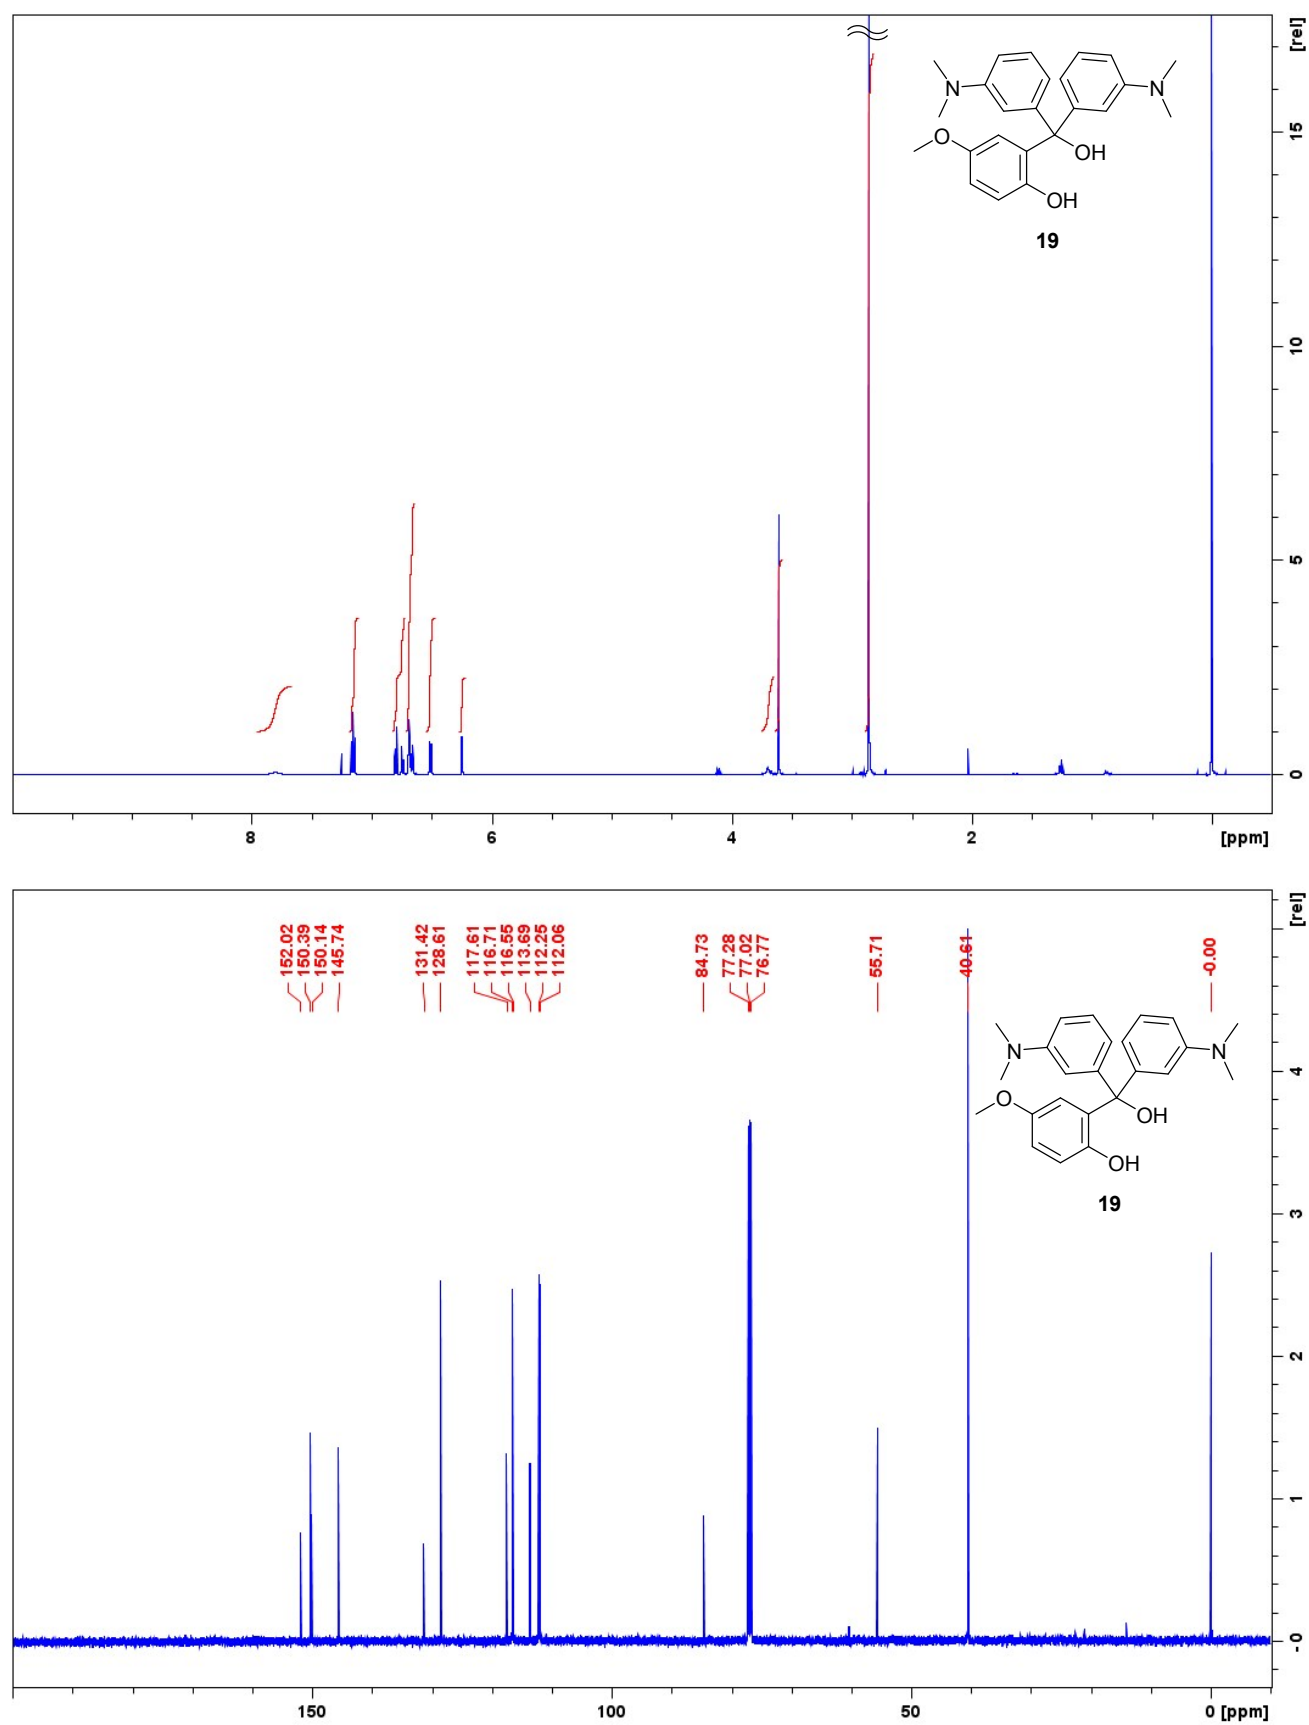

Fig. S7  $^1\text{H}$  (top) and  $^{13}\text{C}$  (bottom) NMR spectra of **19** in  $\text{CDCl}_3$ .

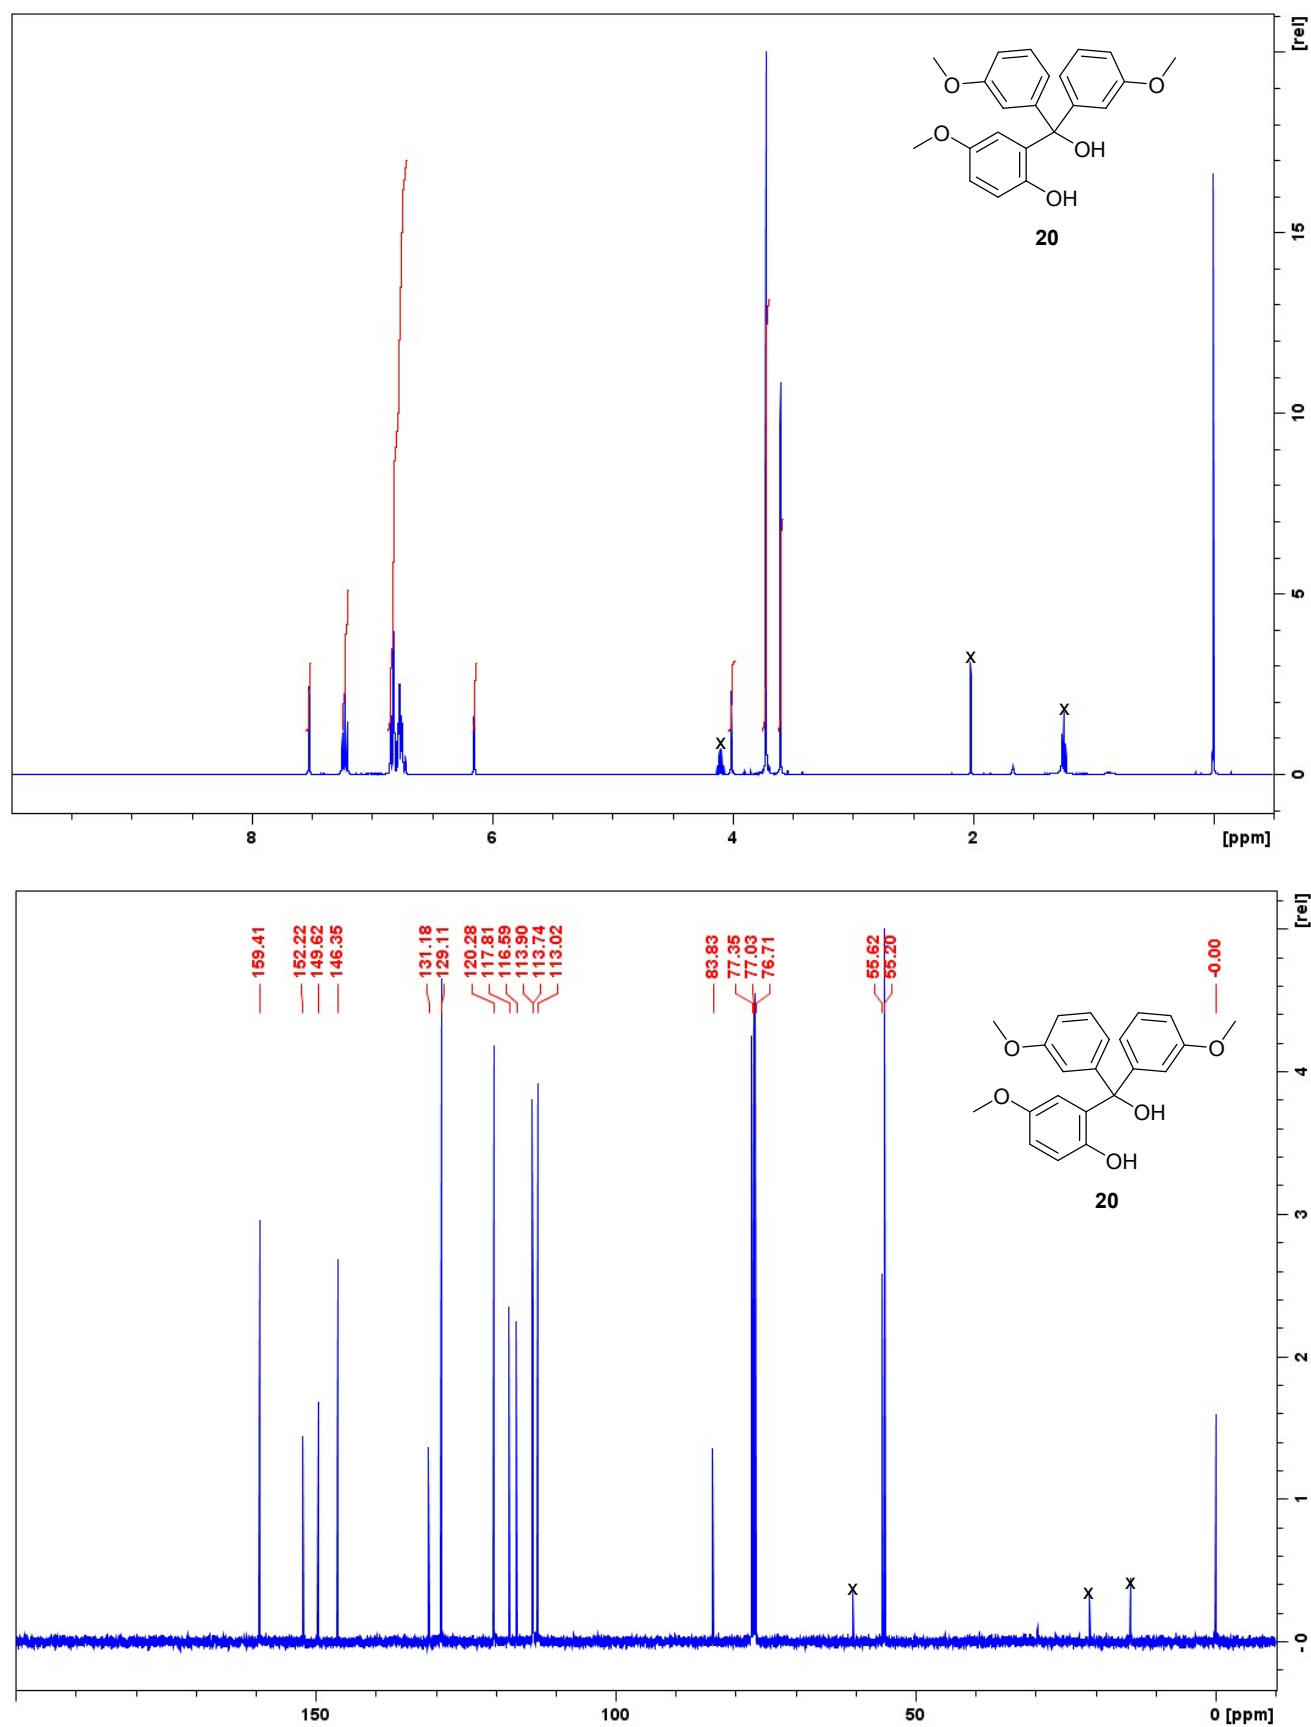

Fig. S8 <sup>1</sup>H (top) and <sup>13</sup>C (bottom) NMR spectra of **20** in CDCl<sub>3</sub> (x = AcOEt).

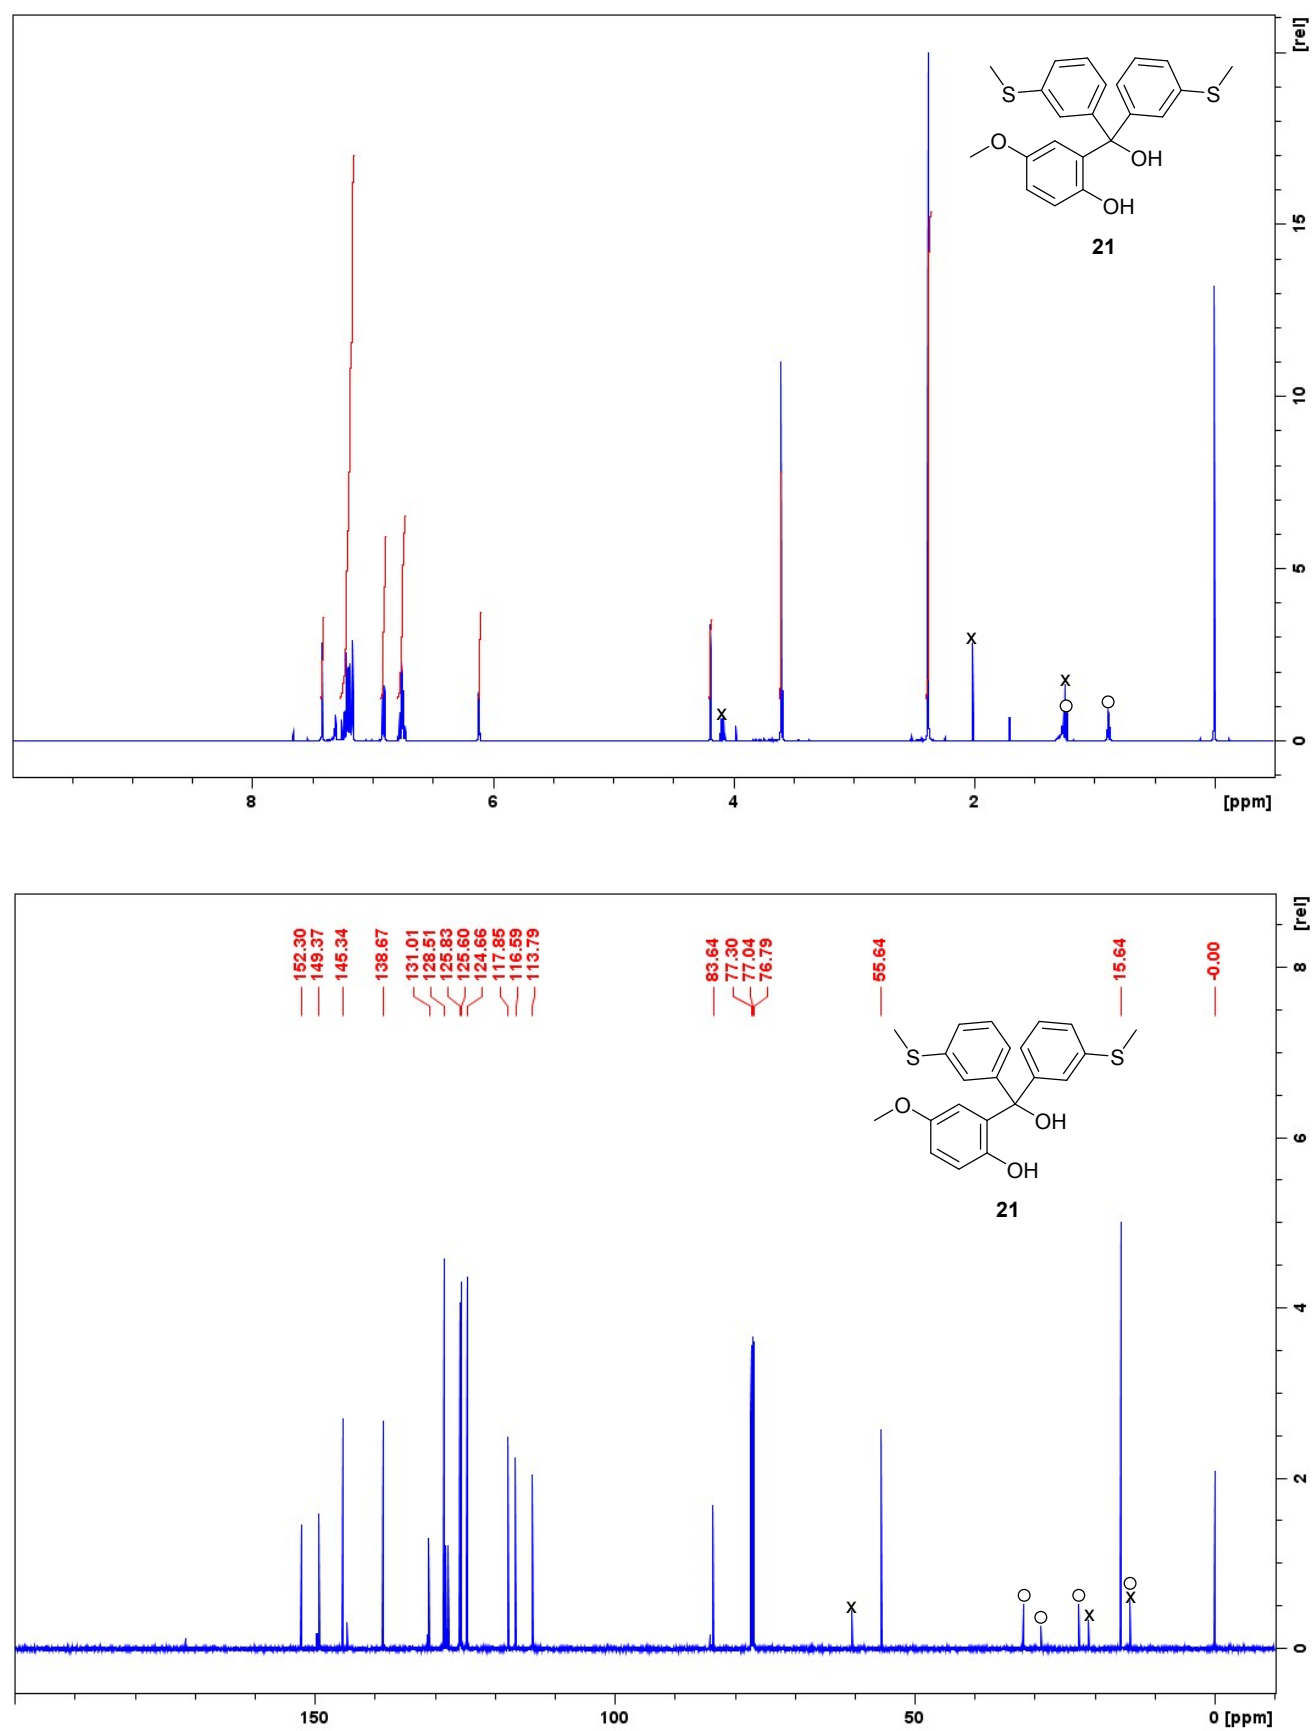

Fig. S9  $^1\text{H}$  (top) and  $^{13}\text{C}$  (bottom) NMR spectra of **21** in  $\text{CDCl}_3$  ( $x = \text{AcOEt}$ ,  $o = n\text{-heptane}$ ).

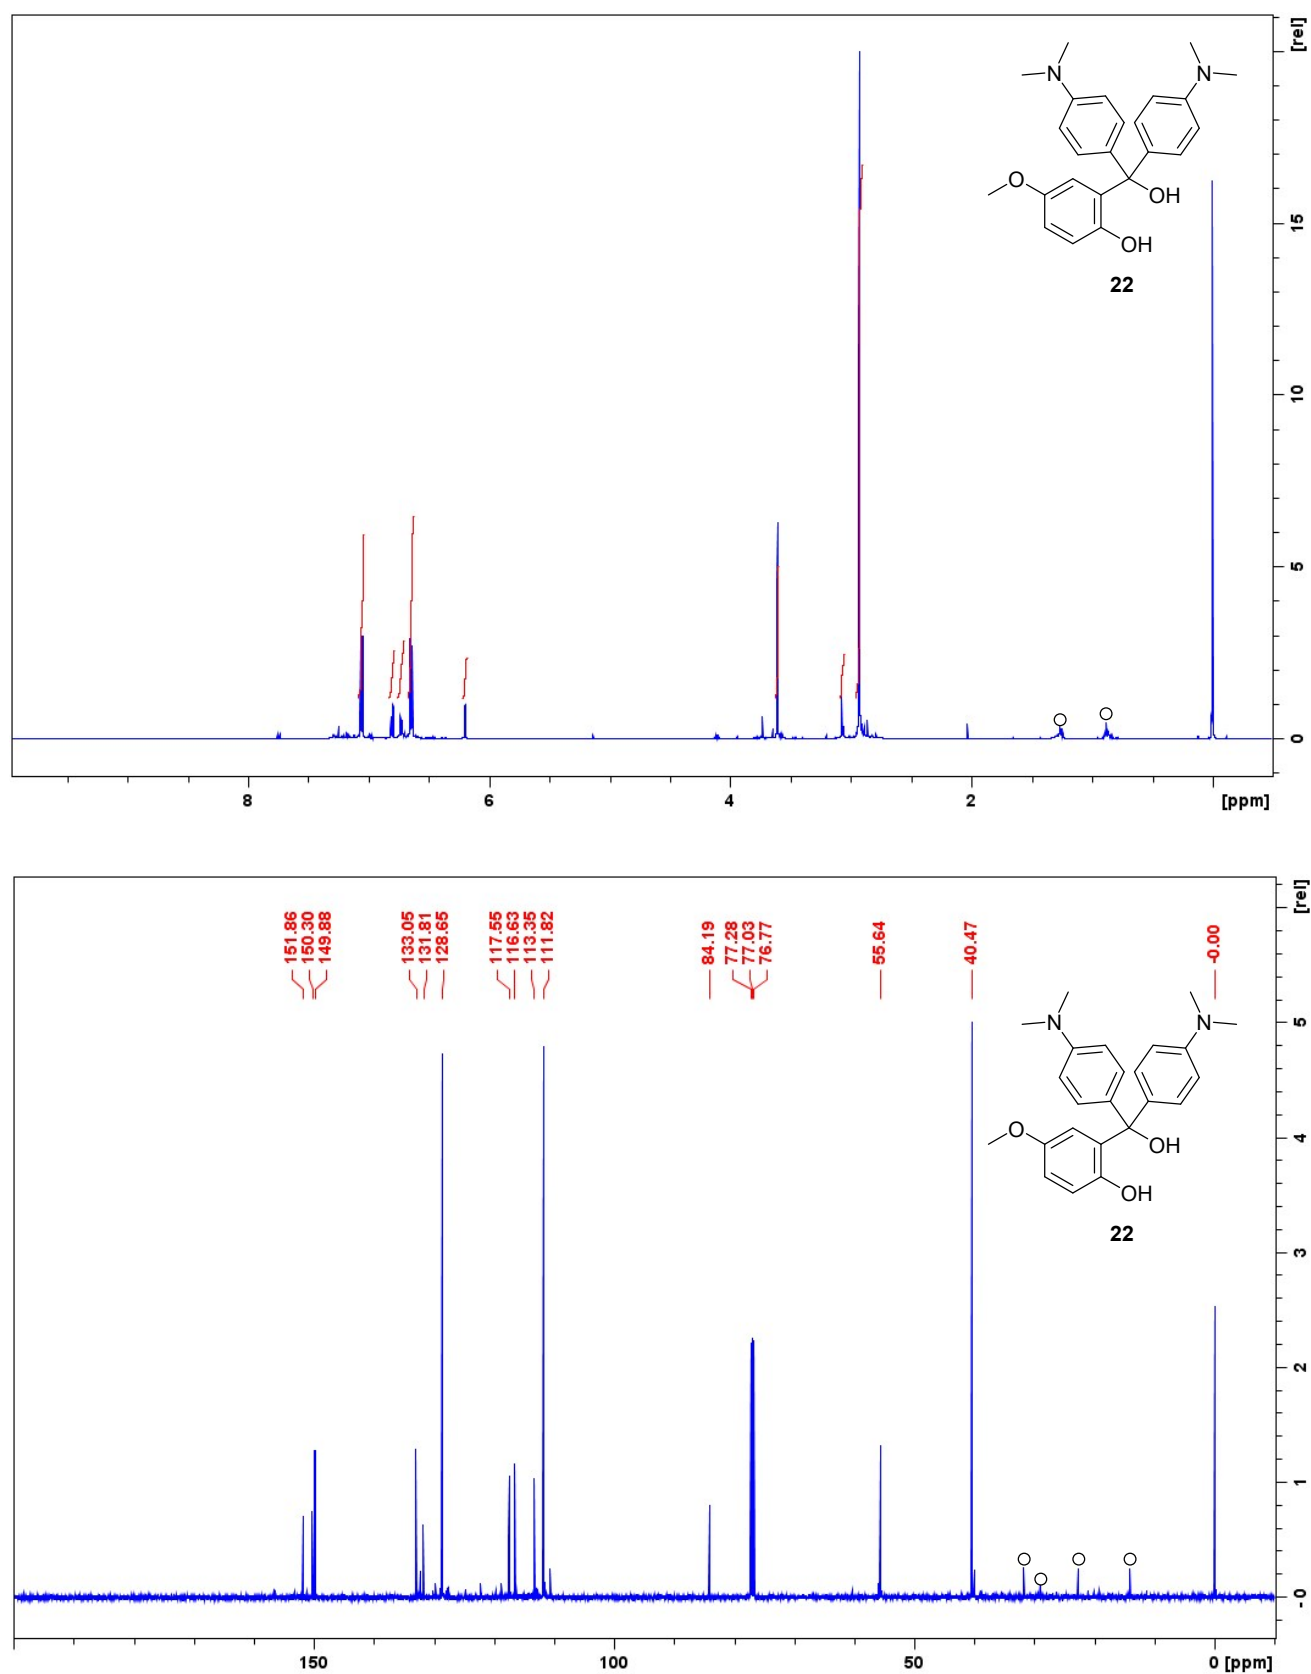

**Fig. S10**  $^1\text{H}$  (top) and  $^{13}\text{C}$  (bottom) NMR spectra of **22** in  $\text{CDCl}_3$  (o =  $n$ -heptane).

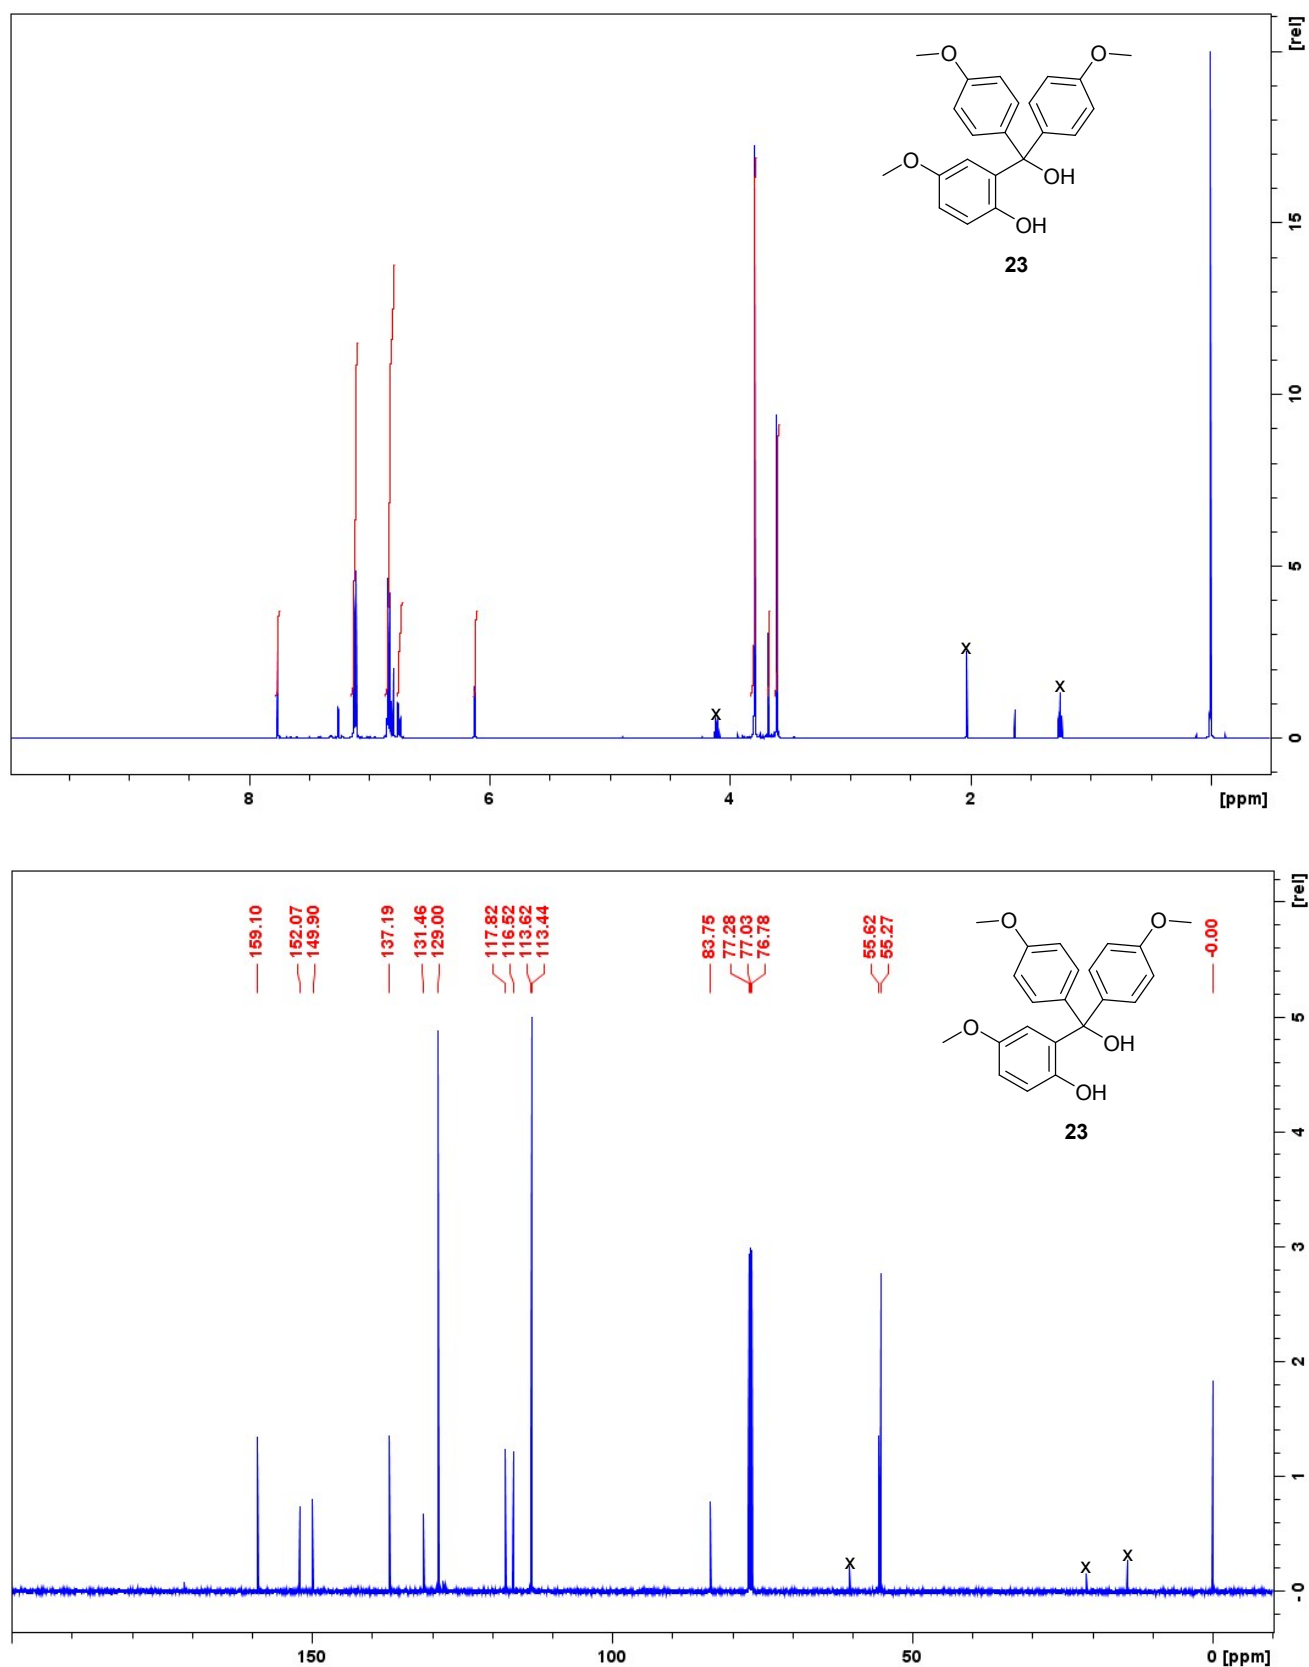

Fig. S11  $^1\text{H}$  (top) and  $^{13}\text{C}$  (bottom) NMR spectra of **23** in  $\text{CDCl}_3$  ( $x = \text{AcOEt}$ ).

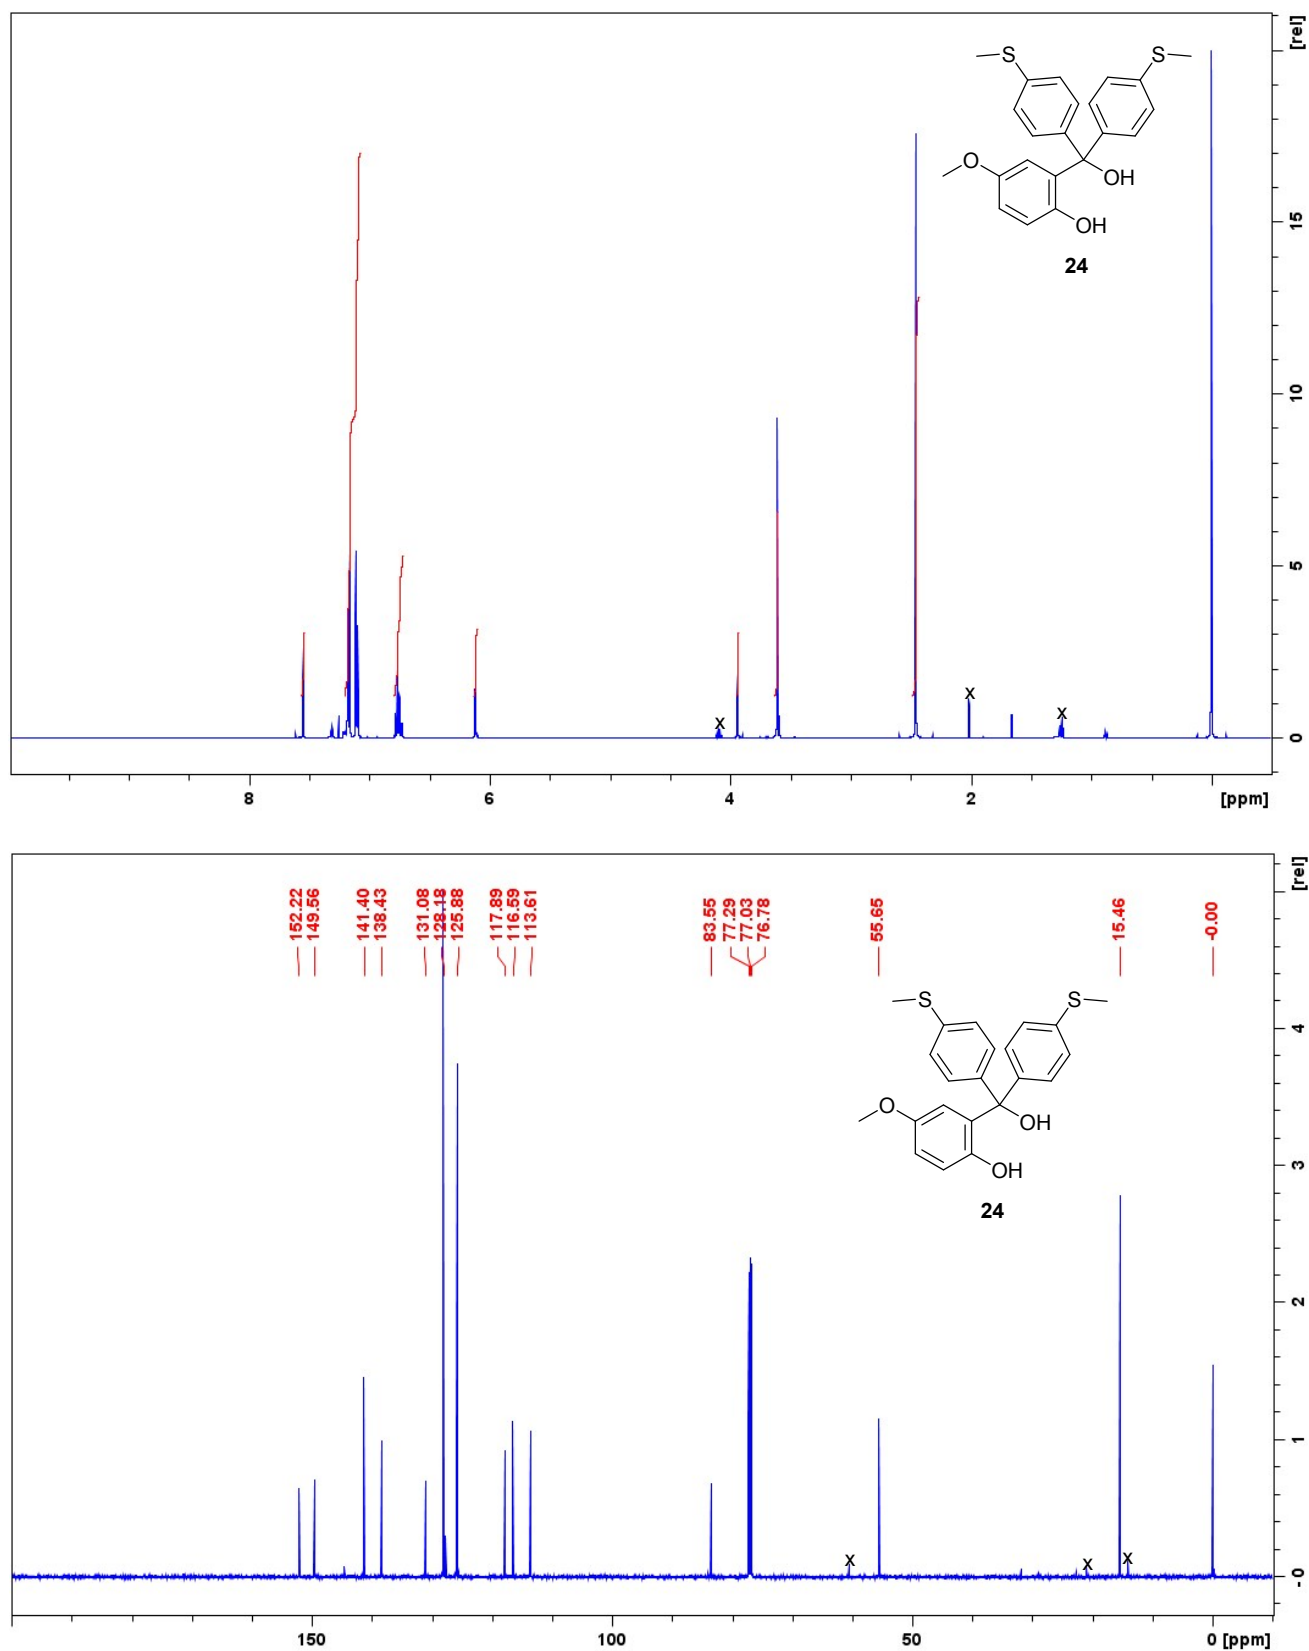

**Fig. S12** <sup>1</sup>H (top) and <sup>13</sup>C (bottom) NMR spectra of **24** in CDCl<sub>3</sub> (x = AcOEt).

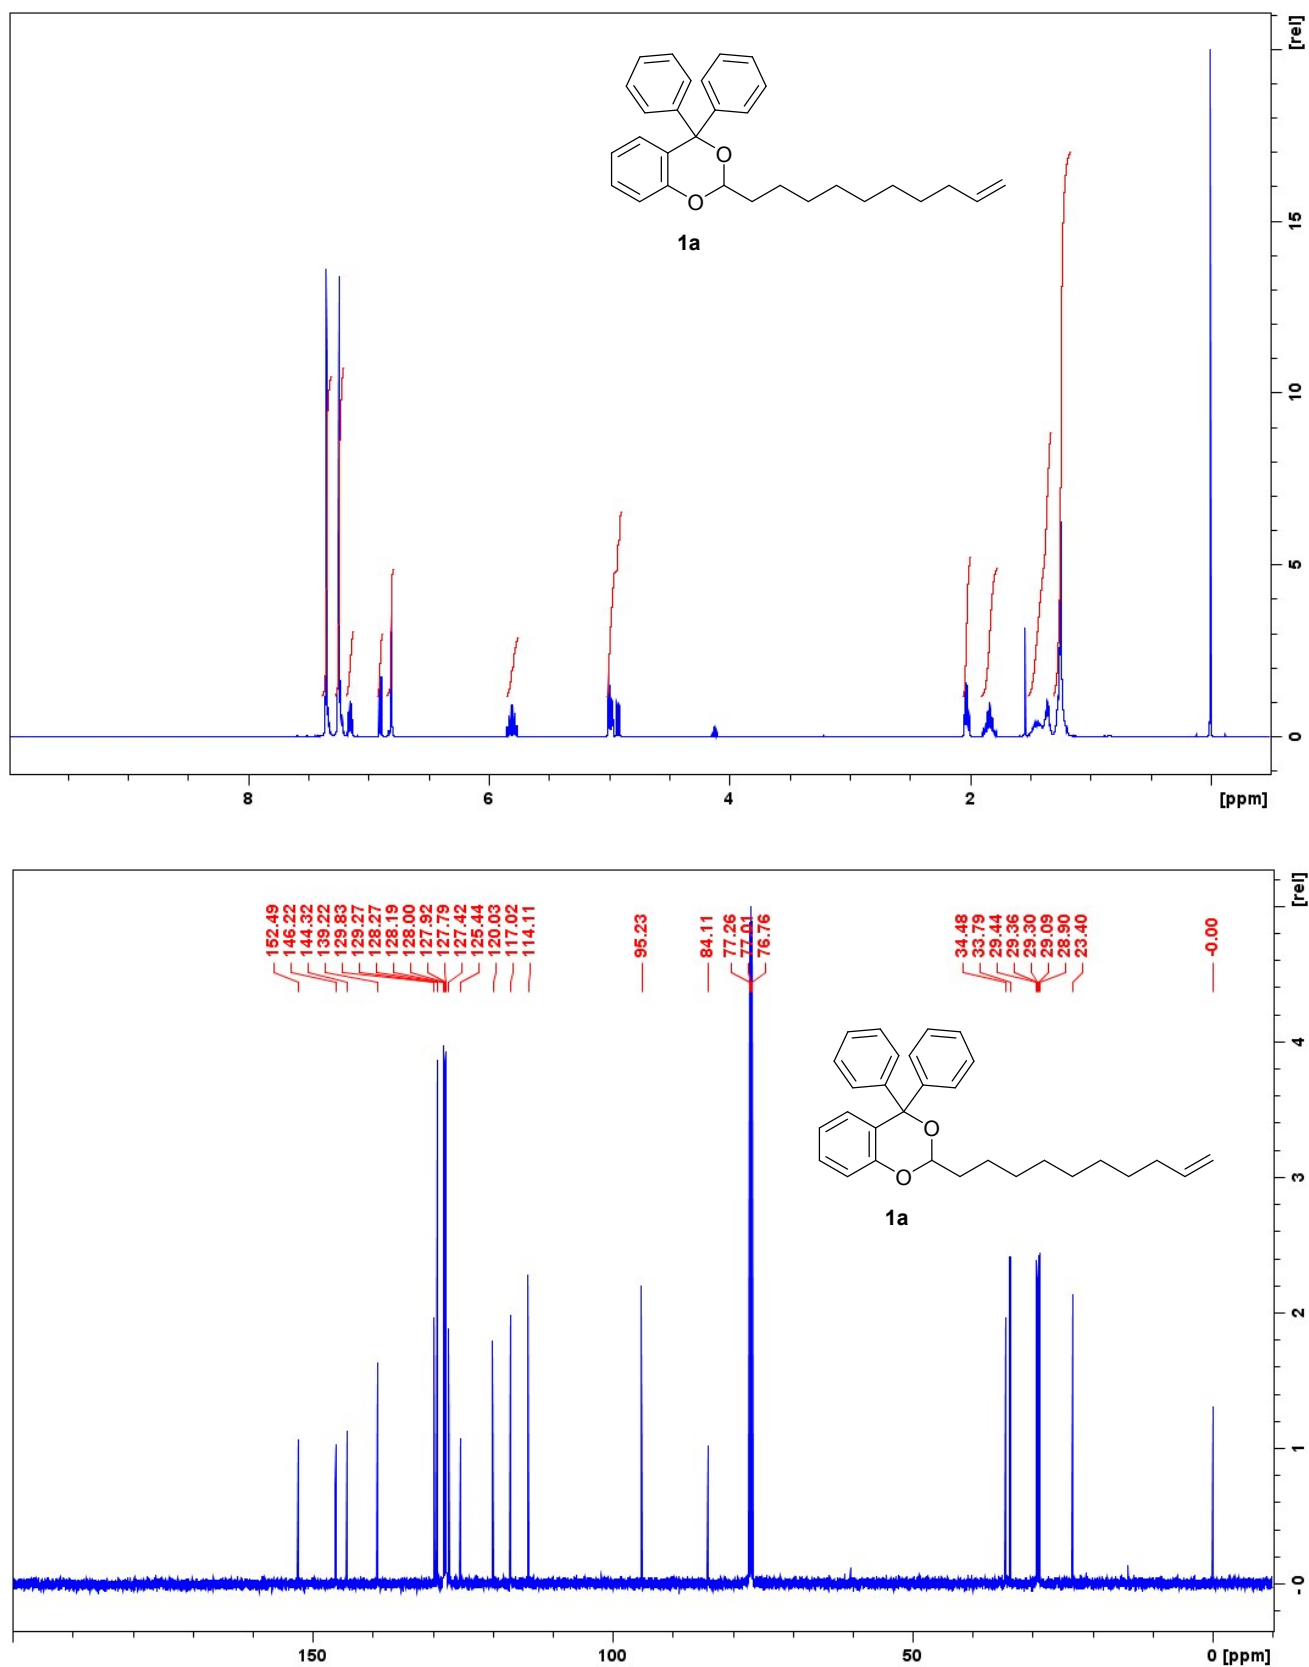

Fig. S13 <sup>1</sup>H (top) and <sup>13</sup>C (bottom) NMR spectra of **1a** in CDCl<sub>3</sub>.



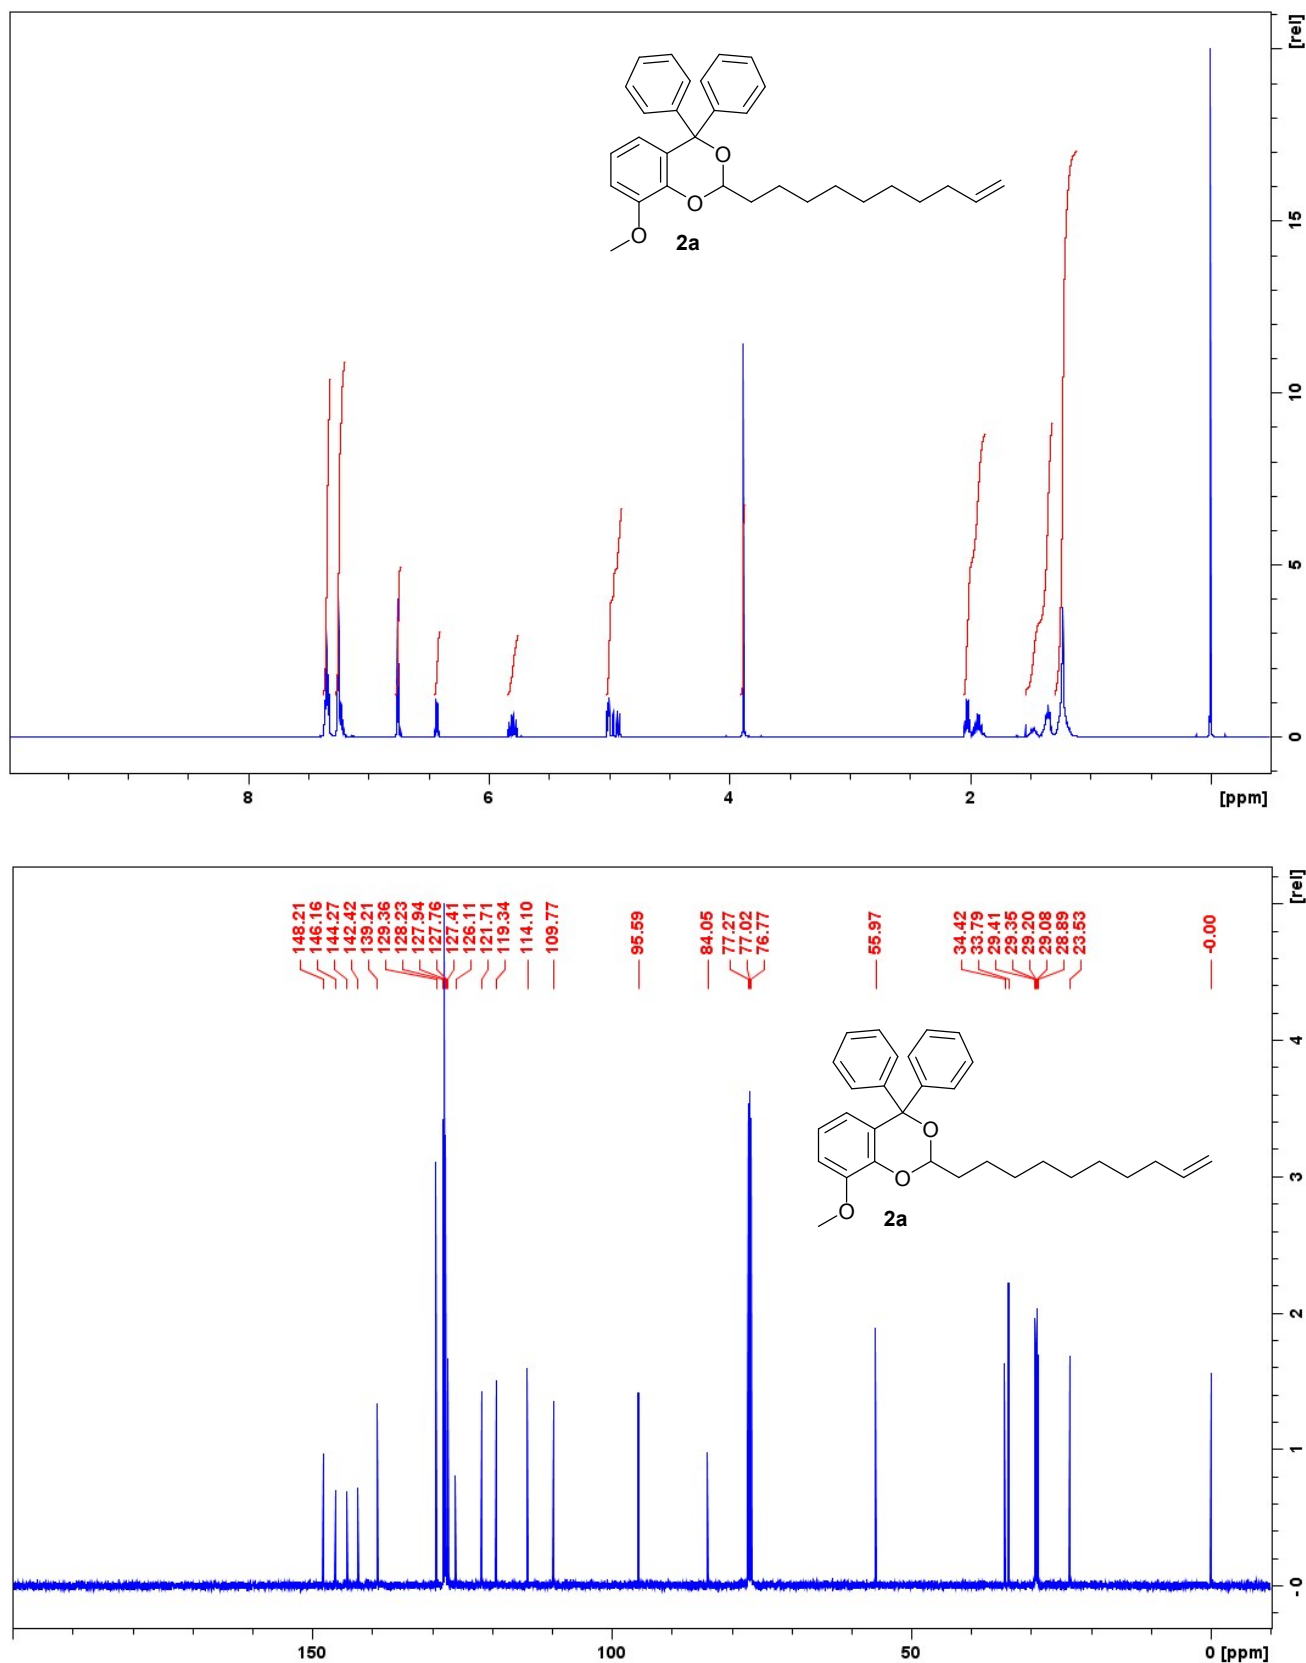

Fig. S14  $^1\text{H}$  (top) and  $^{13}\text{C}$  (bottom) NMR spectra of **2a** in  $\text{CDCl}_3$ .

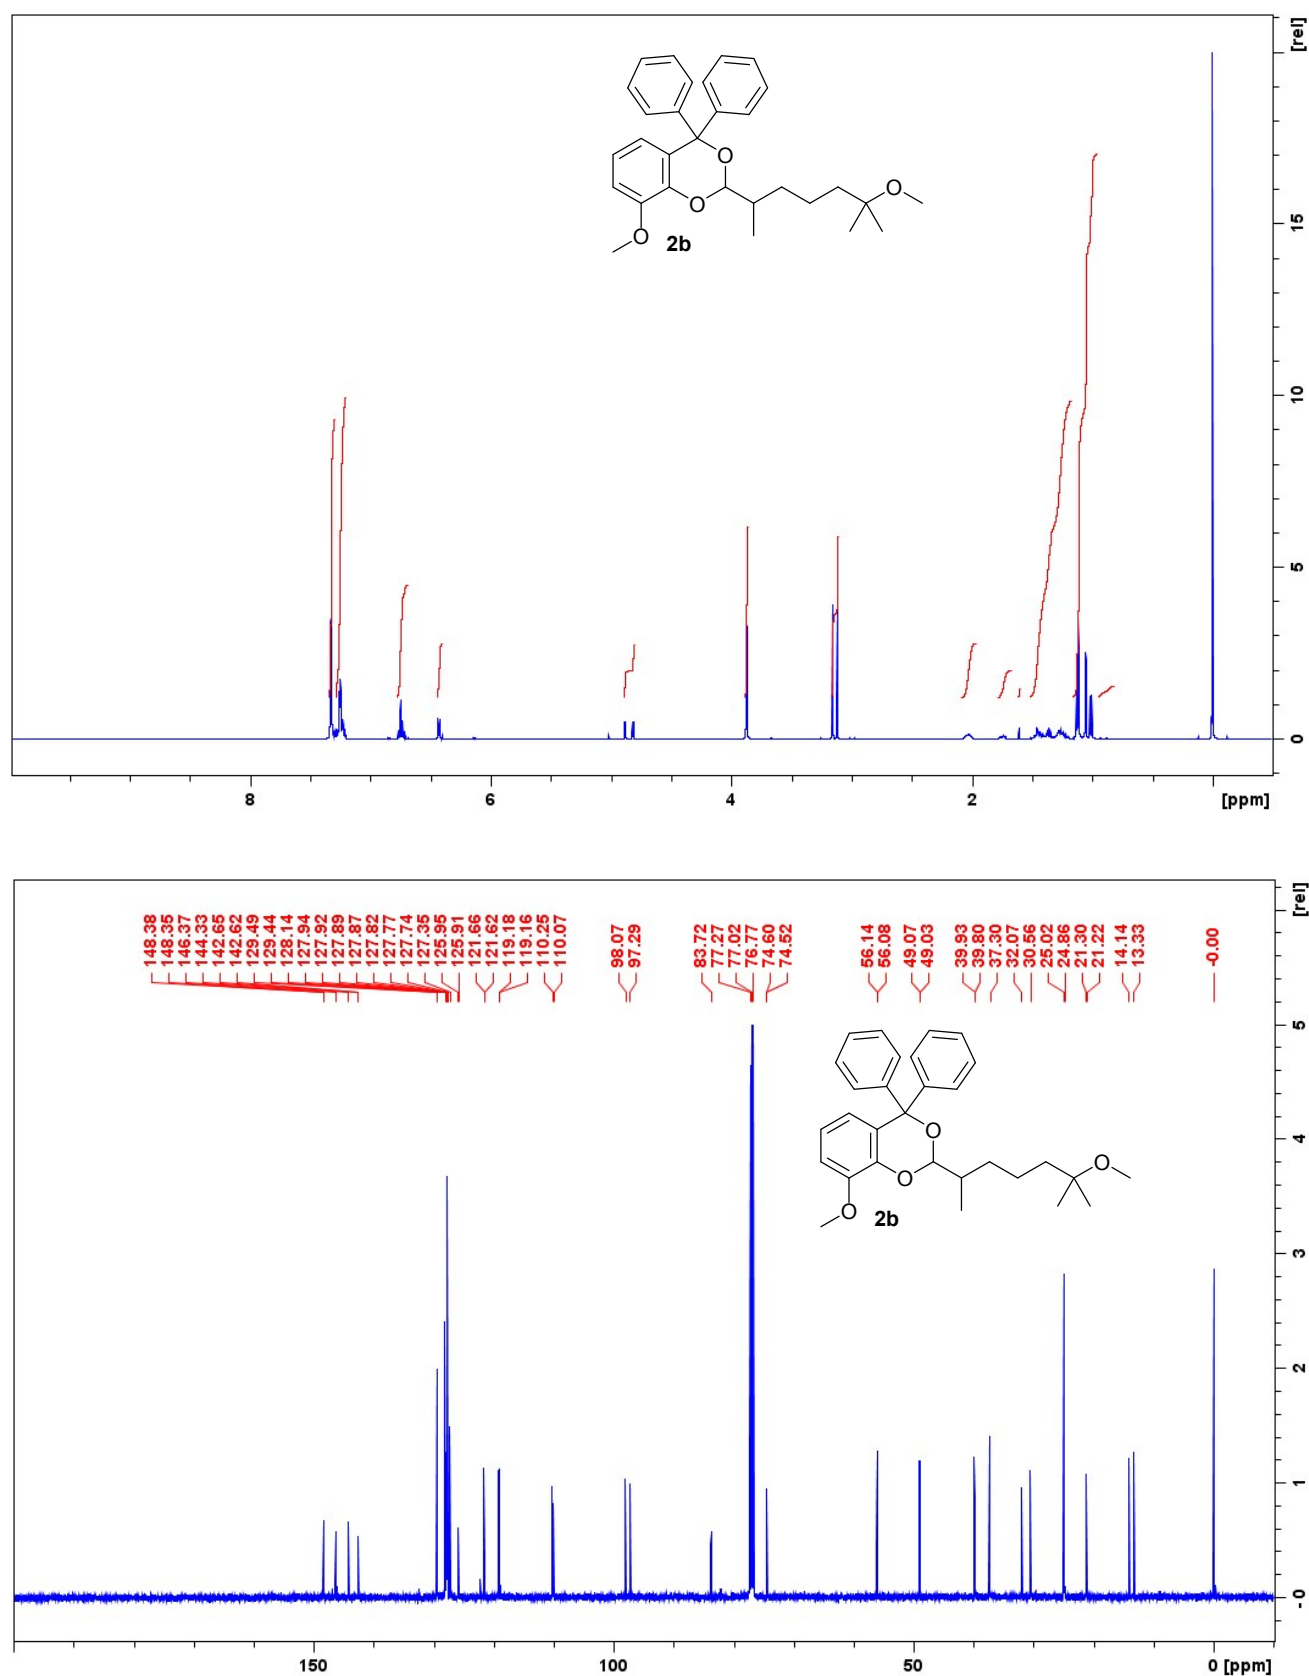

Fig. S15 <sup>1</sup>H (top) and <sup>13</sup>C (bottom) NMR spectra of **2b** in CDCl<sub>3</sub>.

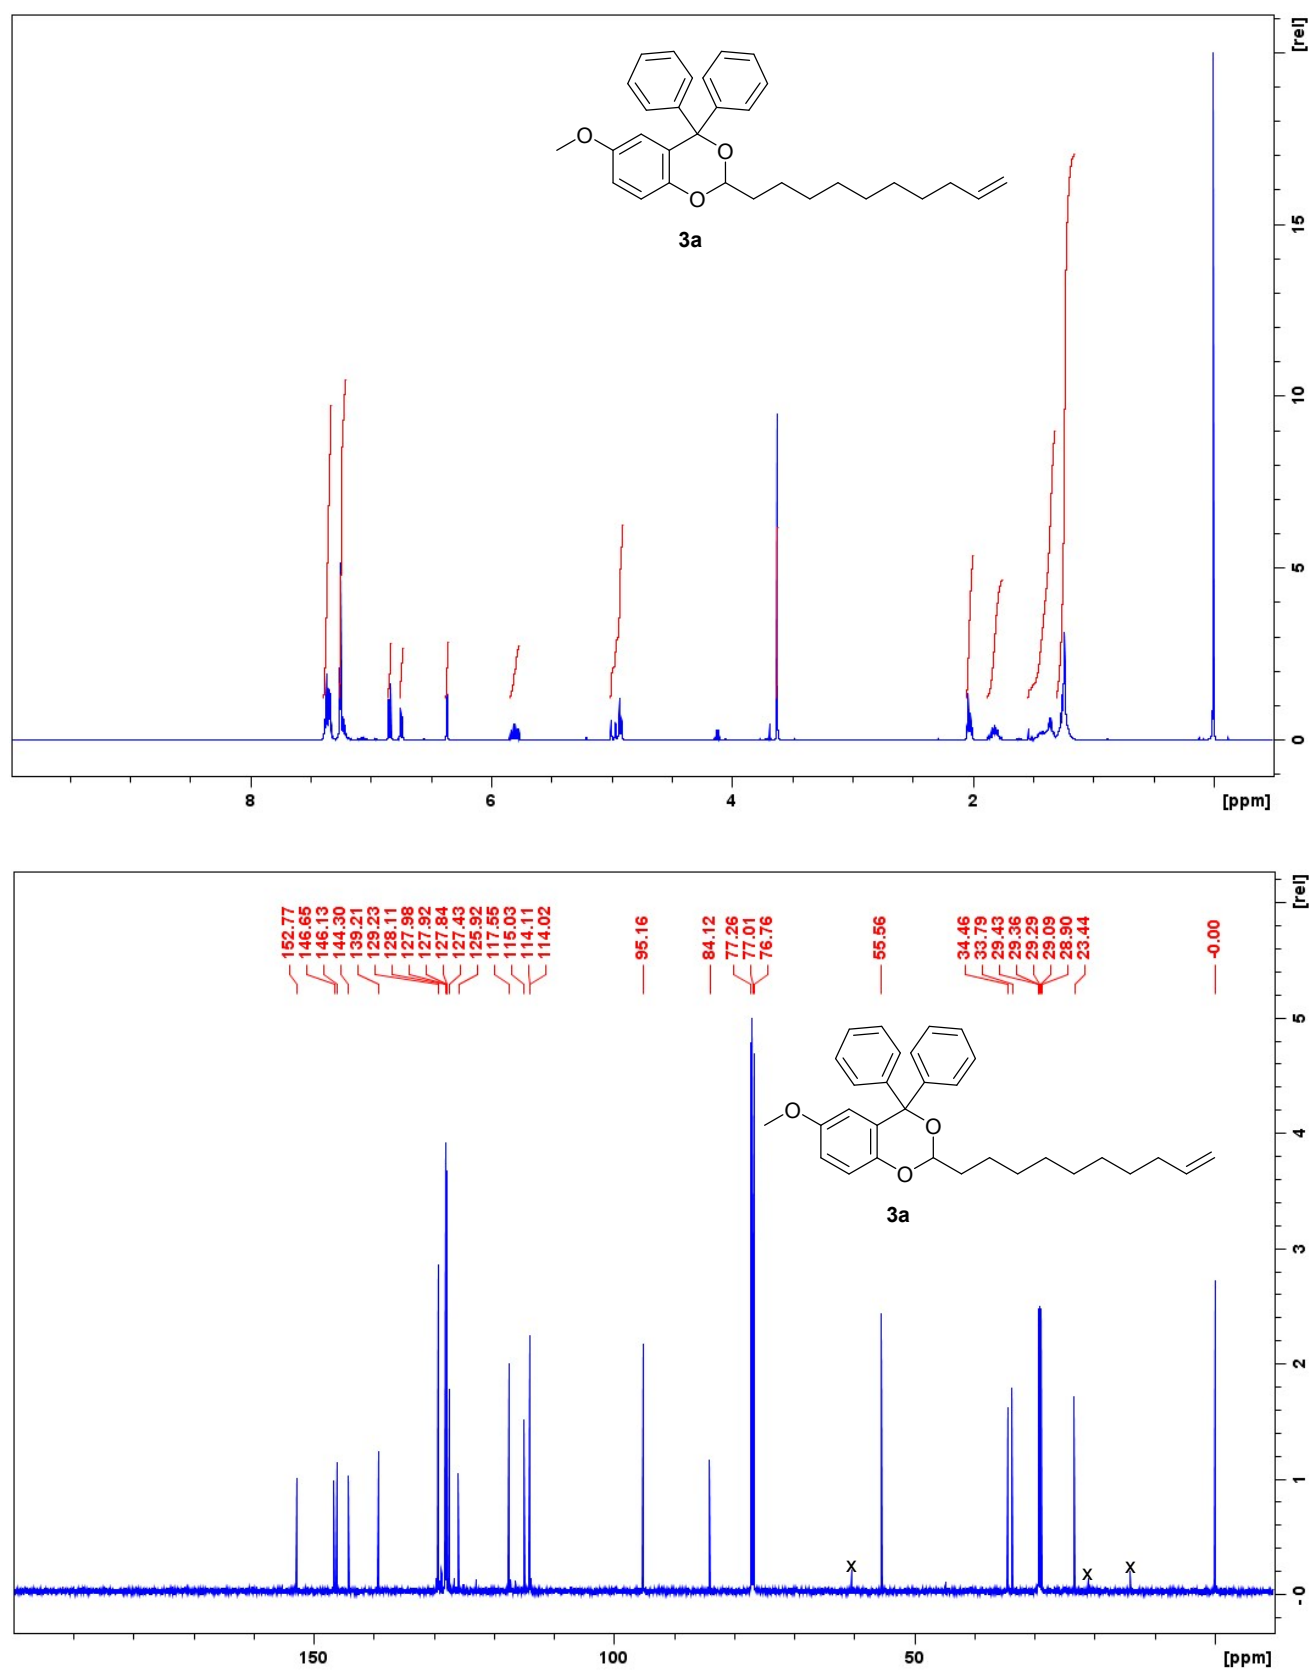

**Fig. S16**  $^1\text{H}$  (top) and  $^{13}\text{C}$  (bottom) NMR spectra of **3a** in  $\text{CDCl}_3$  (x = AcOEt).

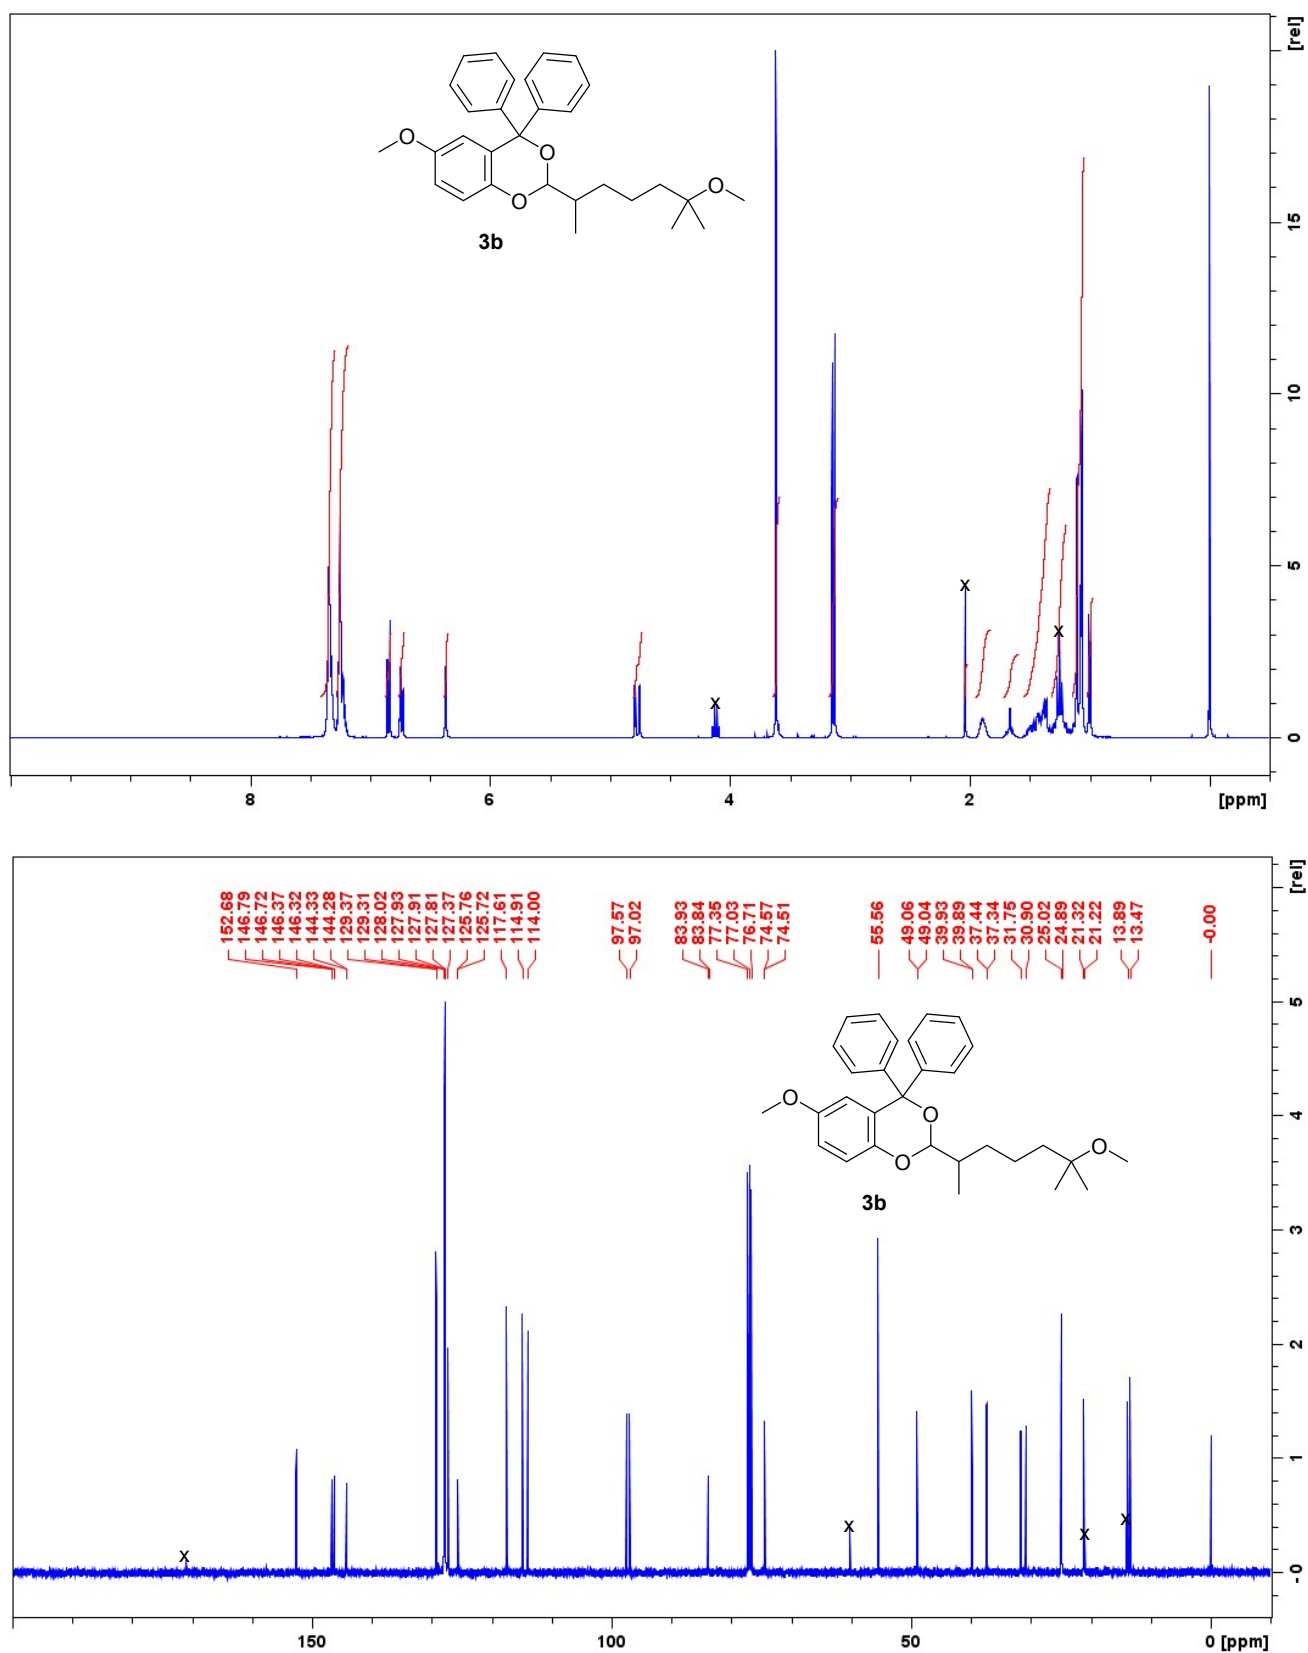

**Fig. S17** <sup>1</sup>H (top) and <sup>13</sup>C (bottom) NMR spectra of **3b** in CDCl<sub>3</sub> (x = AcOEt).

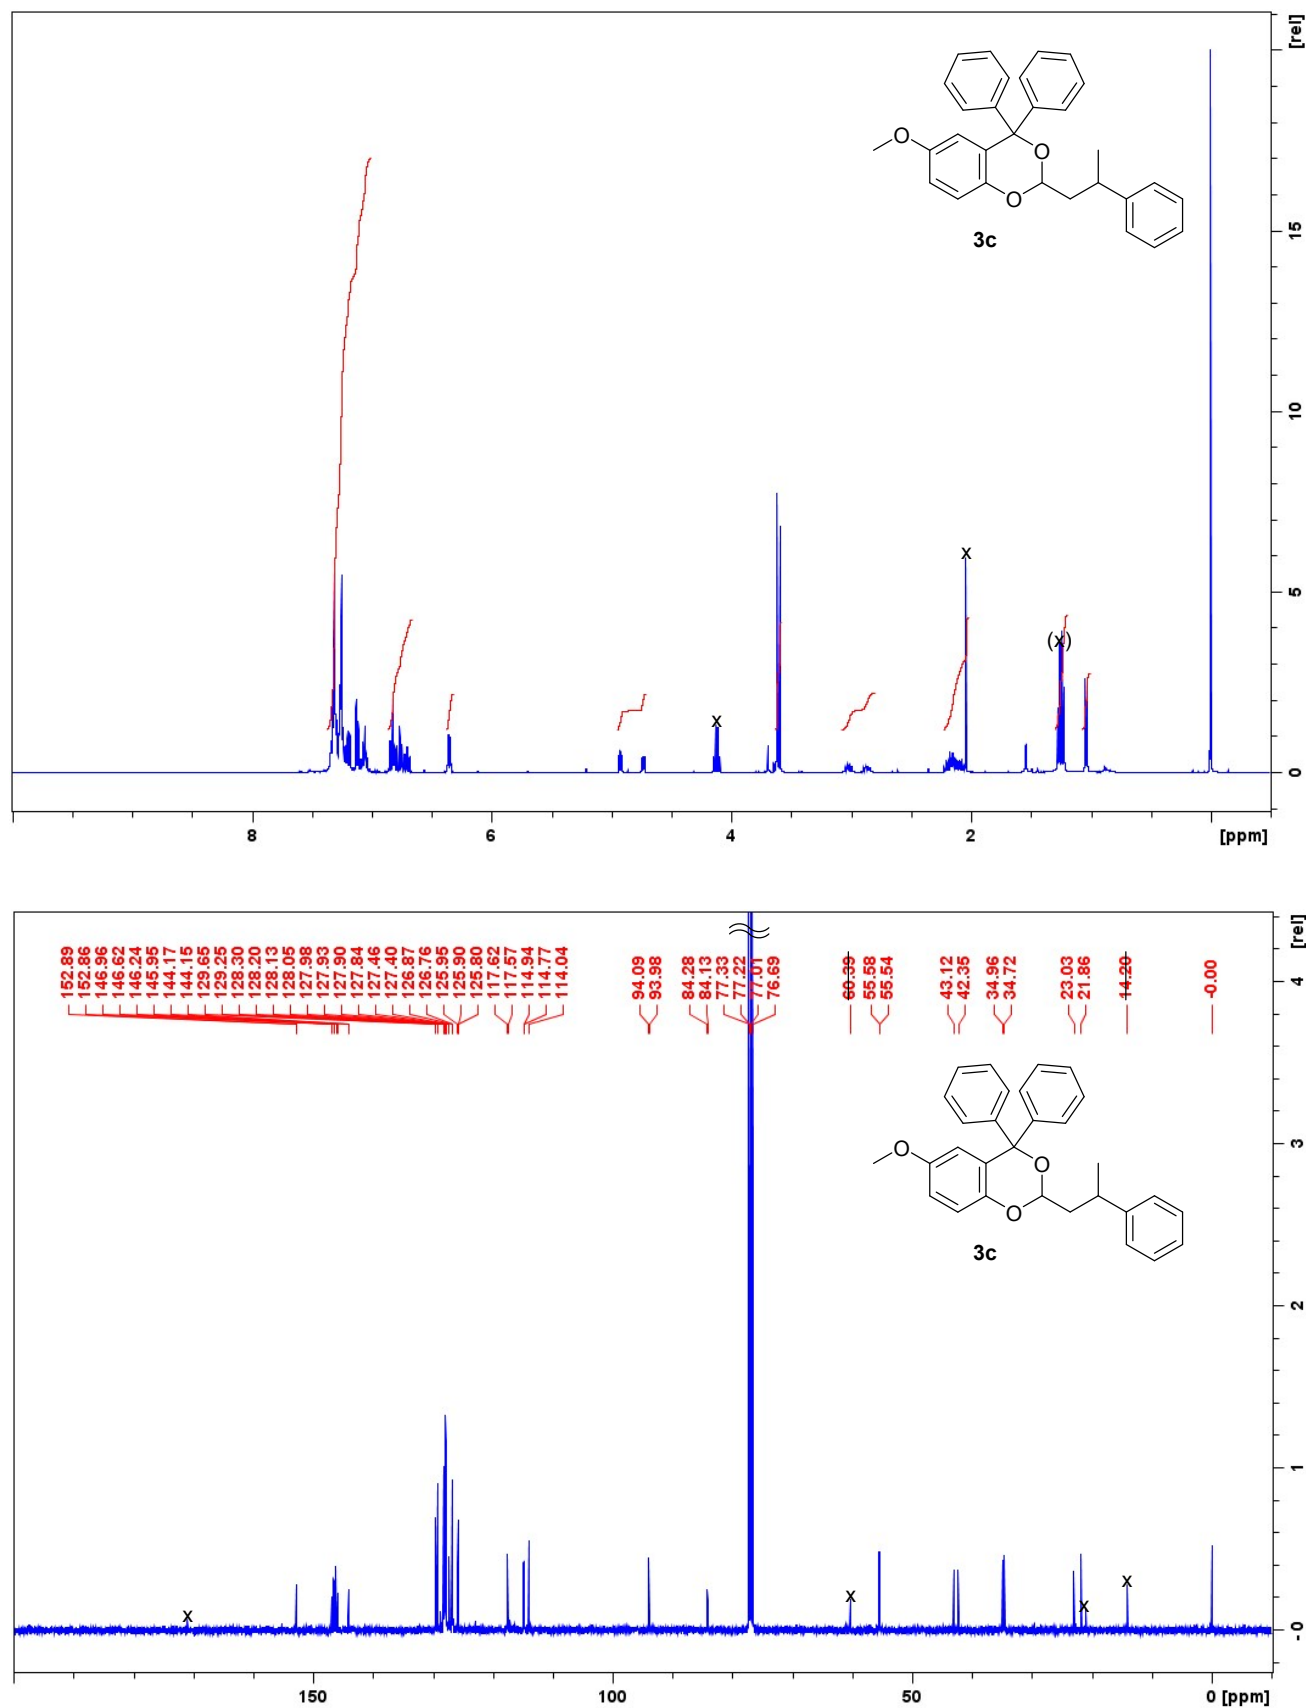

Fig. S18  $^1\text{H}$  (top) and  $^{13}\text{C}$  (bottom) NMR spectra of **3c** in  $\text{CDCl}_3$  (x = AcOEt).

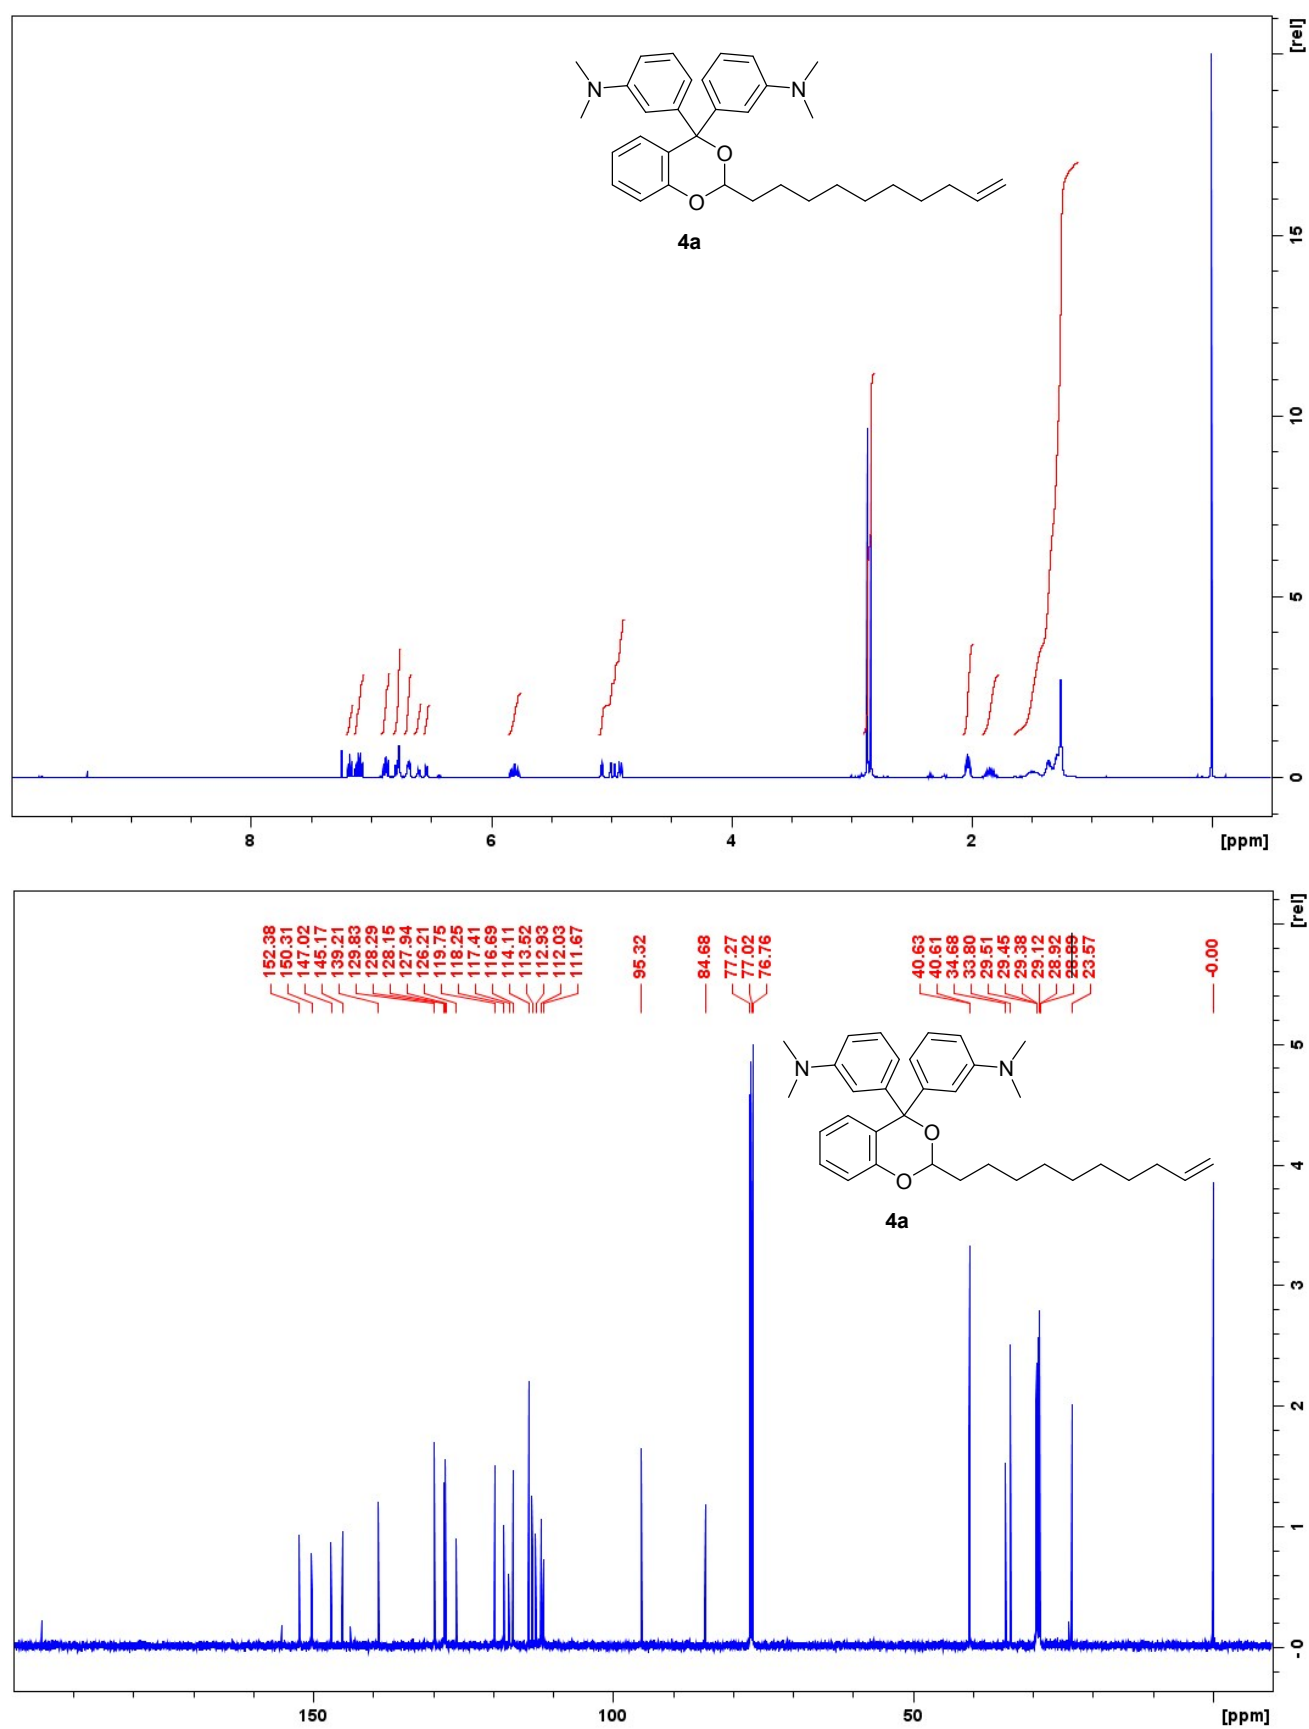

Fig. S19 <sup>1</sup>H (top) and <sup>13</sup>C (bottom) NMR spectra of **4a** in CDCl<sub>3</sub>.

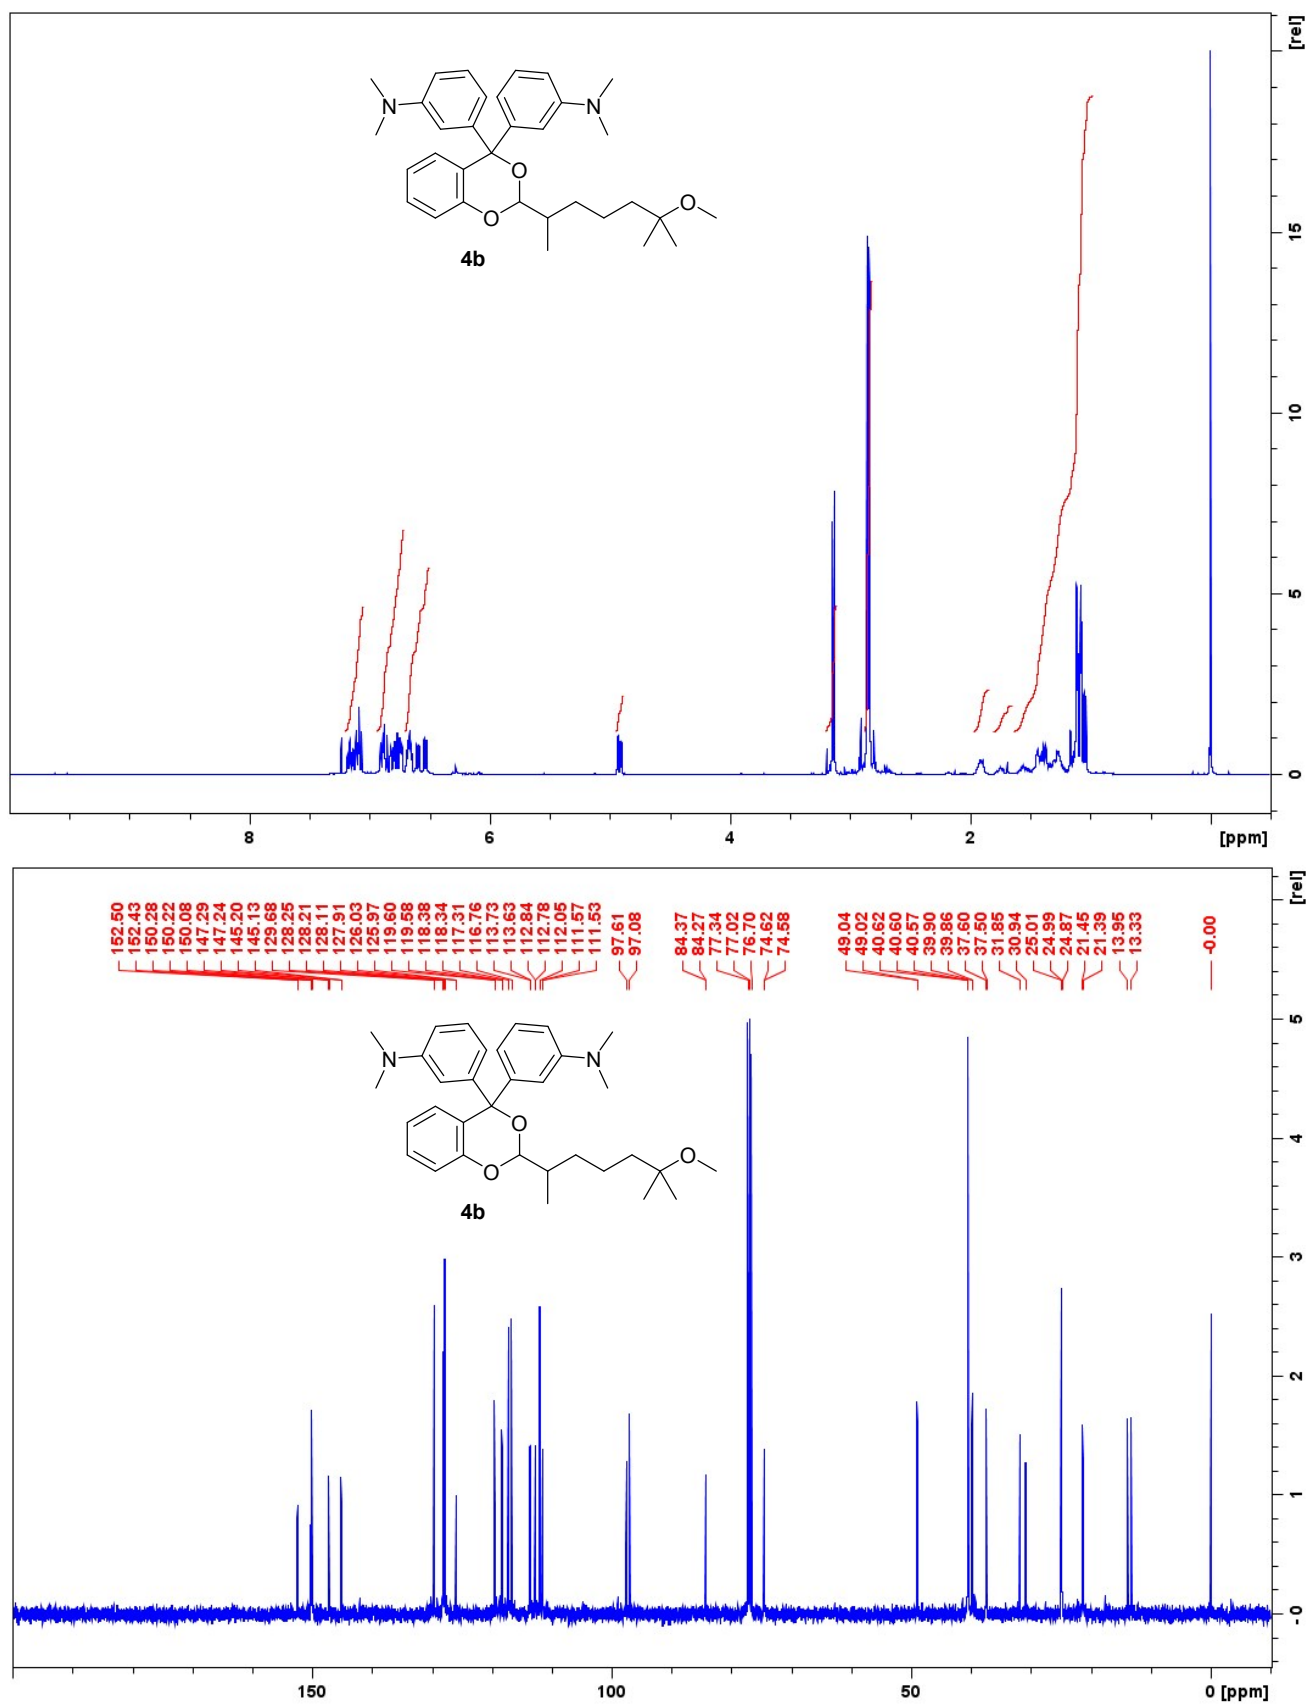

Fig. S20  $^1\text{H}$  (top) and  $^{13}\text{C}$  (bottom) NMR spectra of **4b** in  $\text{CDCl}_3$ .

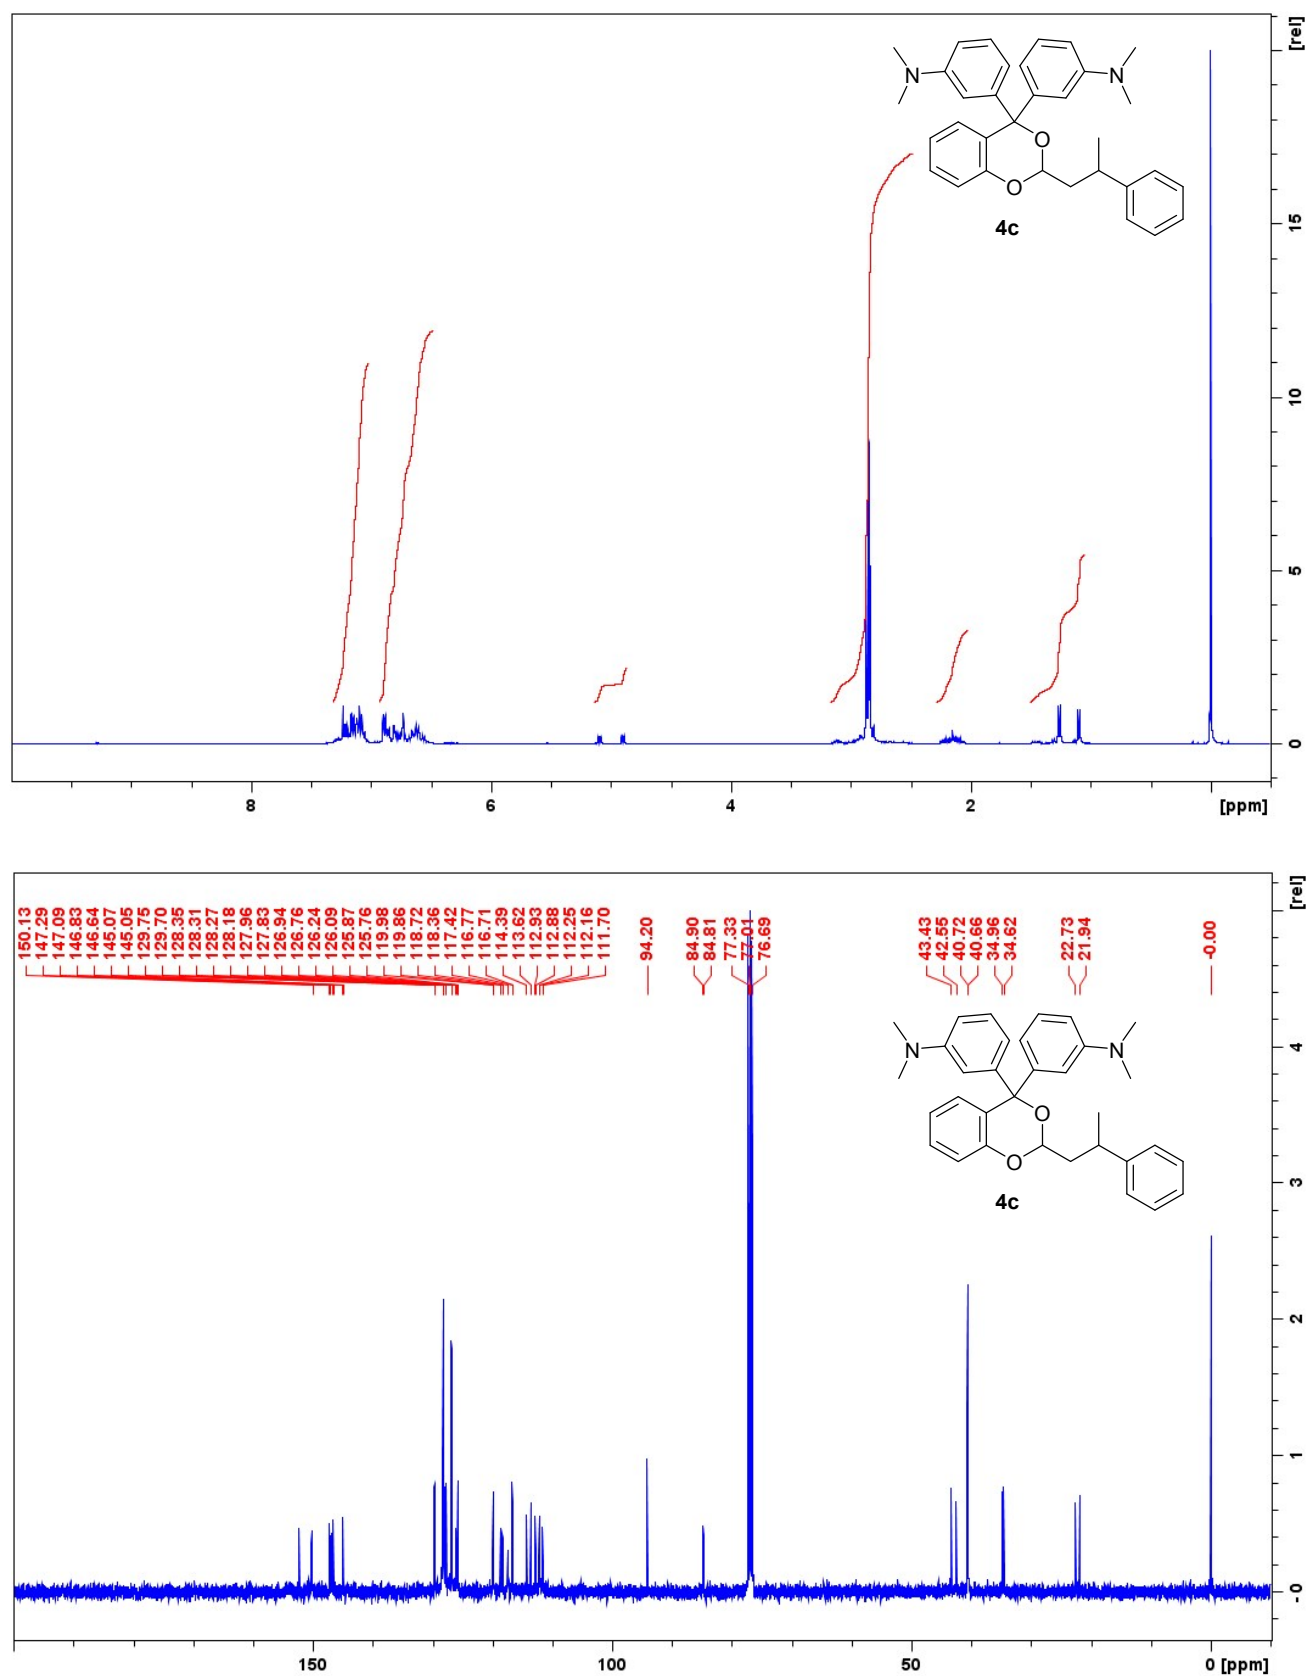

Fig. S21 <sup>1</sup>H (top) and <sup>13</sup>C (bottom) NMR spectra of **4c** in CDCl<sub>3</sub>.



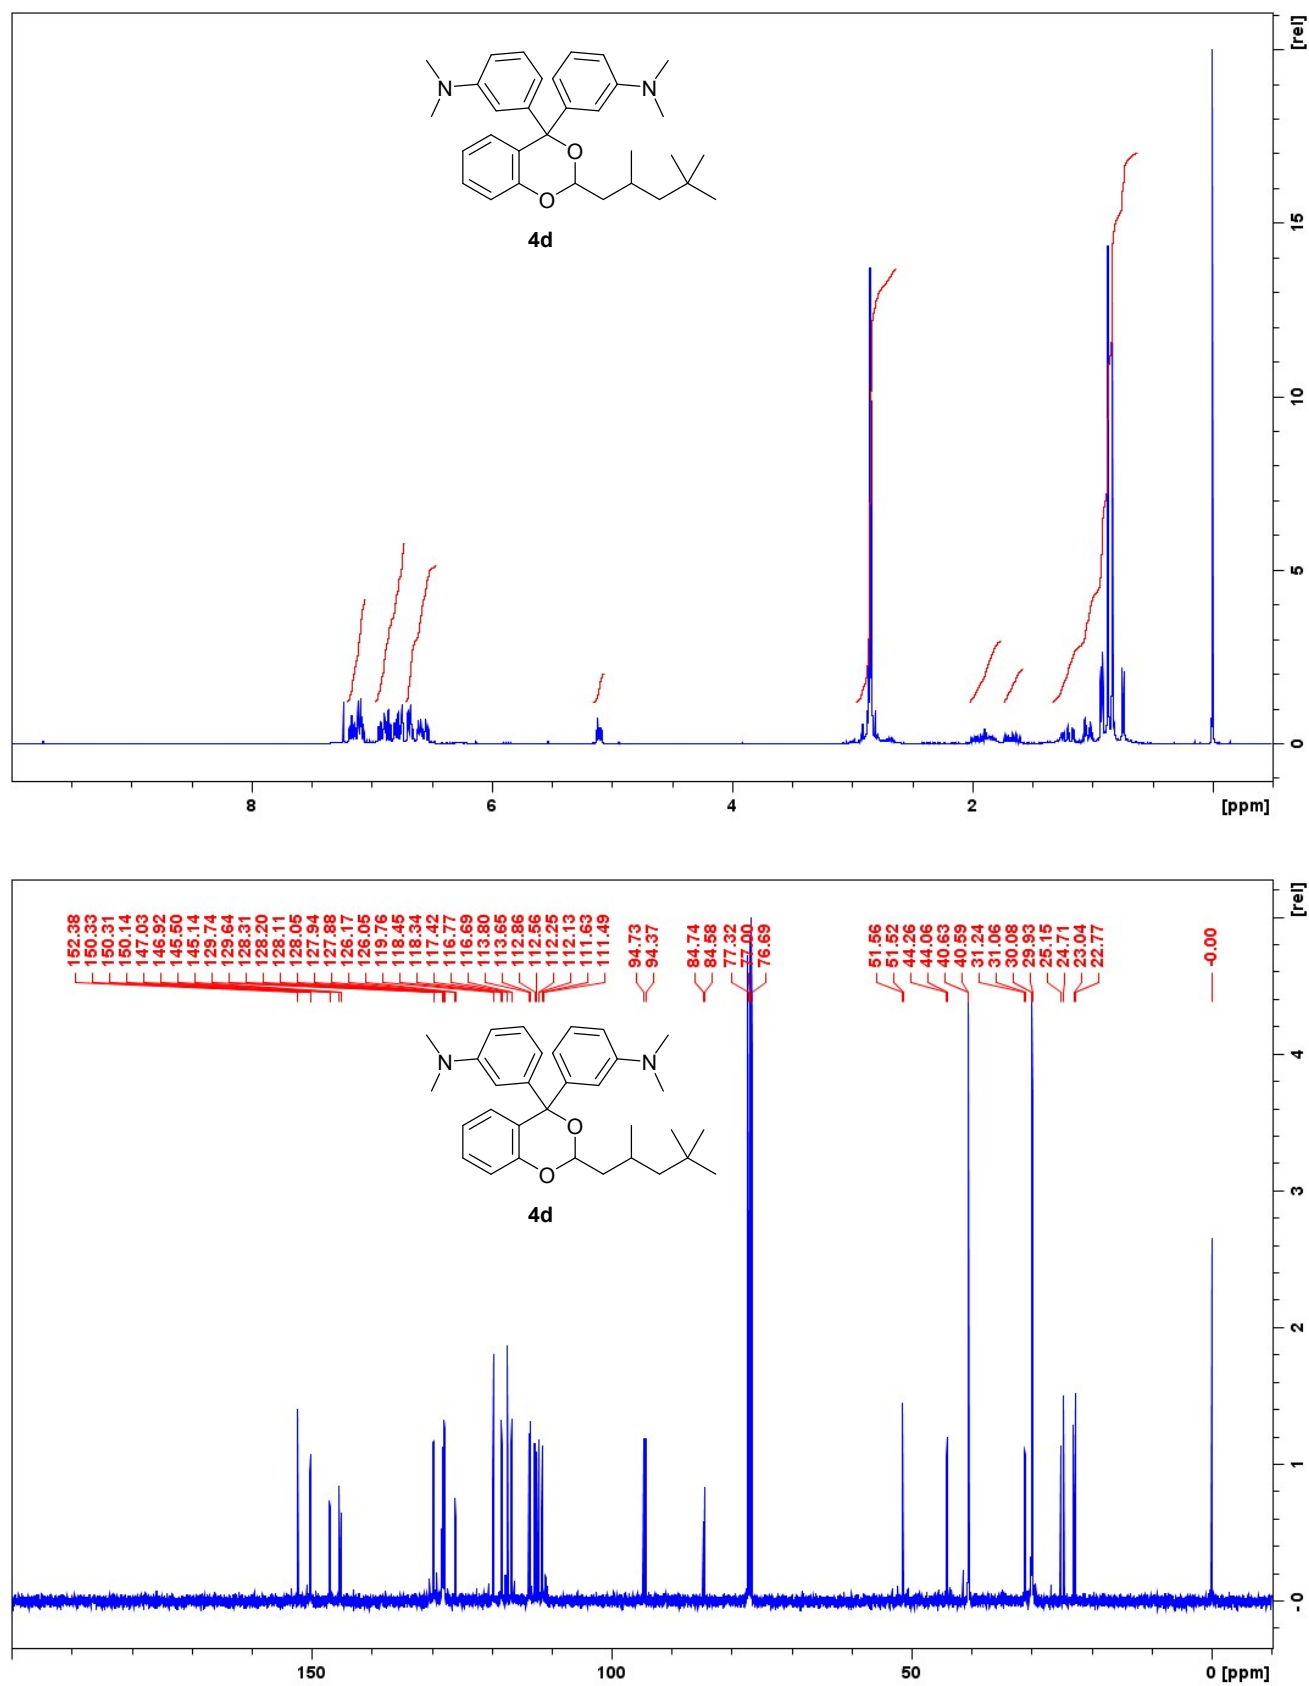

Fig. S22 <sup>1</sup>H (top) and <sup>13</sup>C (bottom) NMR spectra of **4d** in CDCl<sub>3</sub>.

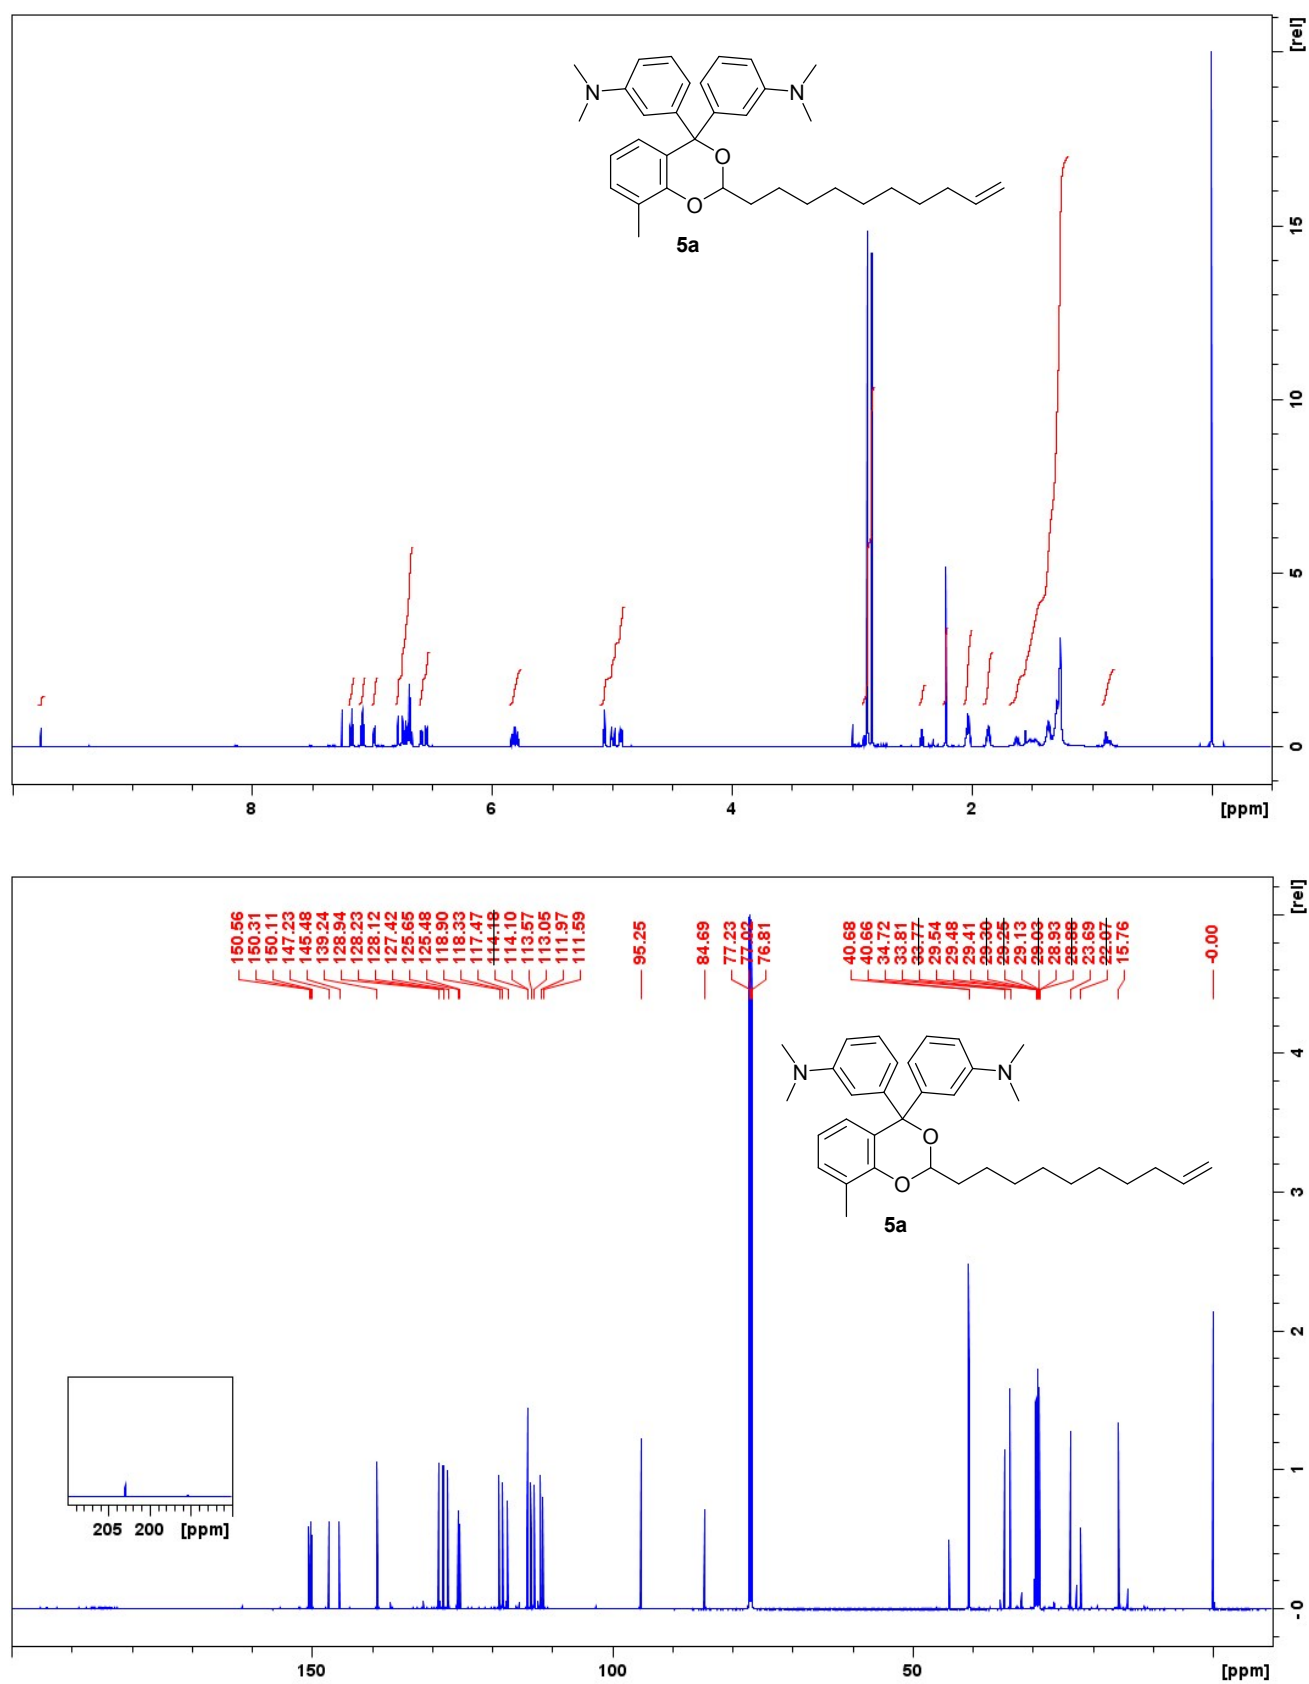

**Fig. S23** <sup>1</sup>H (top) and <sup>13</sup>C (bottom) NMR spectra of **5a** in CDCl<sub>3</sub>. The sample contains *ca.* 25 mol-% of unreacted 10-undecenal.

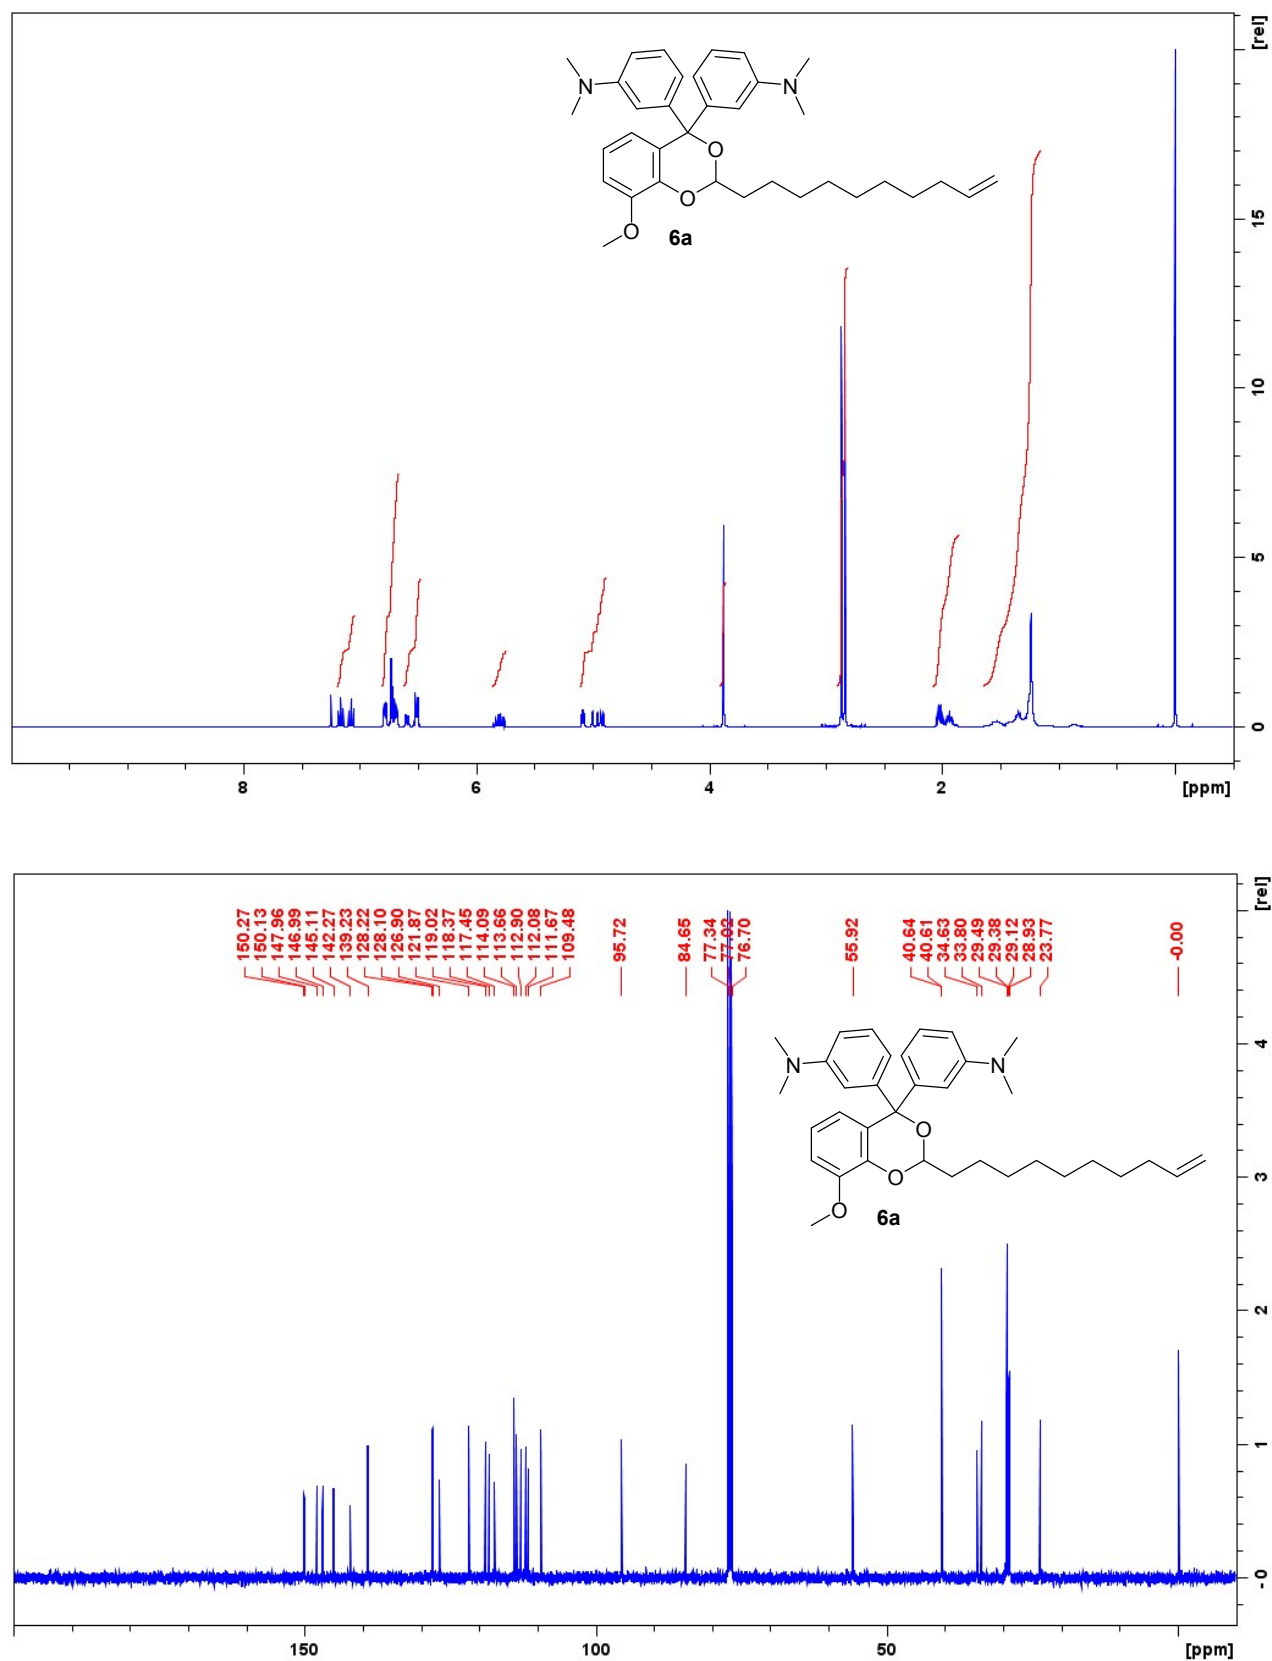

Fig. S24  $^1\text{H}$  (top) and  $^{13}\text{C}$  (bottom) NMR spectra of **6a** in  $\text{CDCl}_3$ .

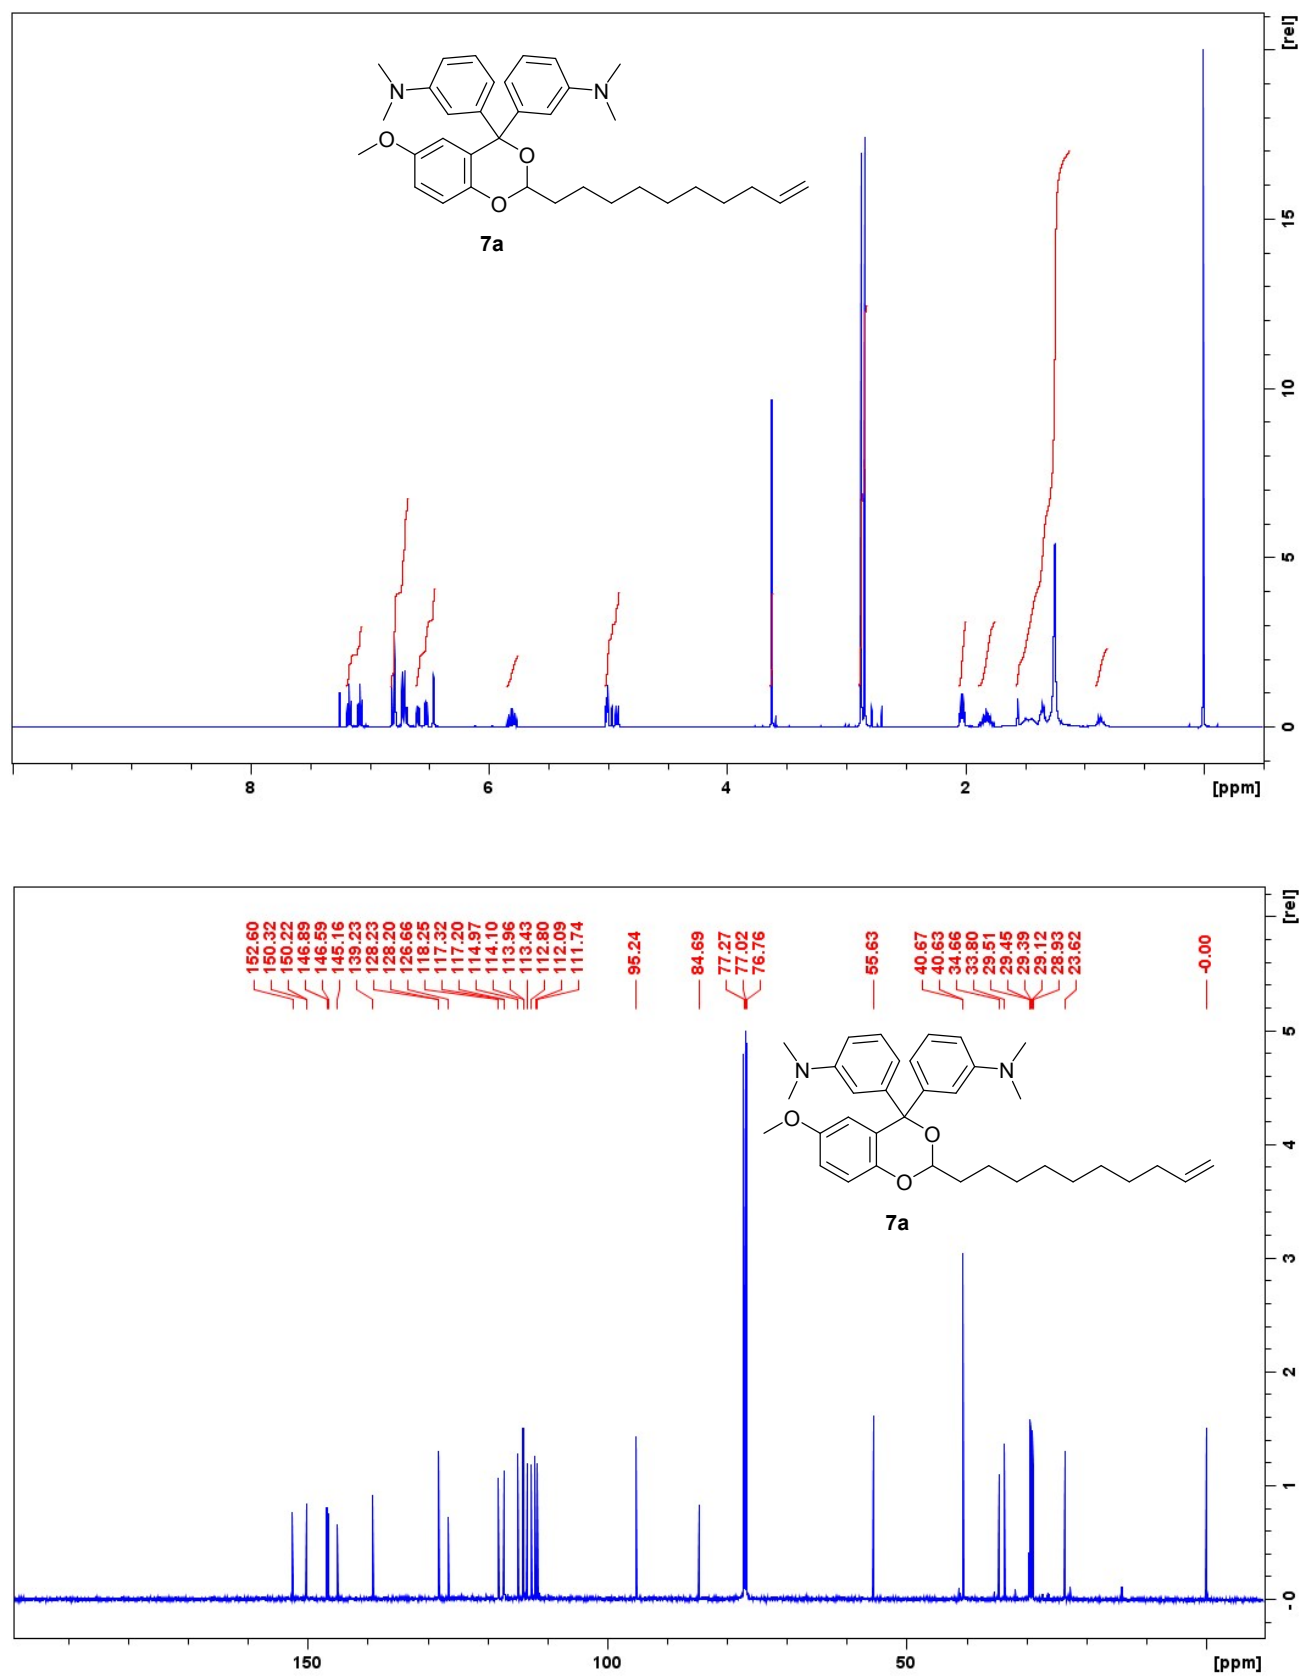

Fig. S25  $^1\text{H}$  (top) and  $^{13}\text{C}$  (bottom) NMR spectra of **7a** in  $\text{CDCl}_3$ .

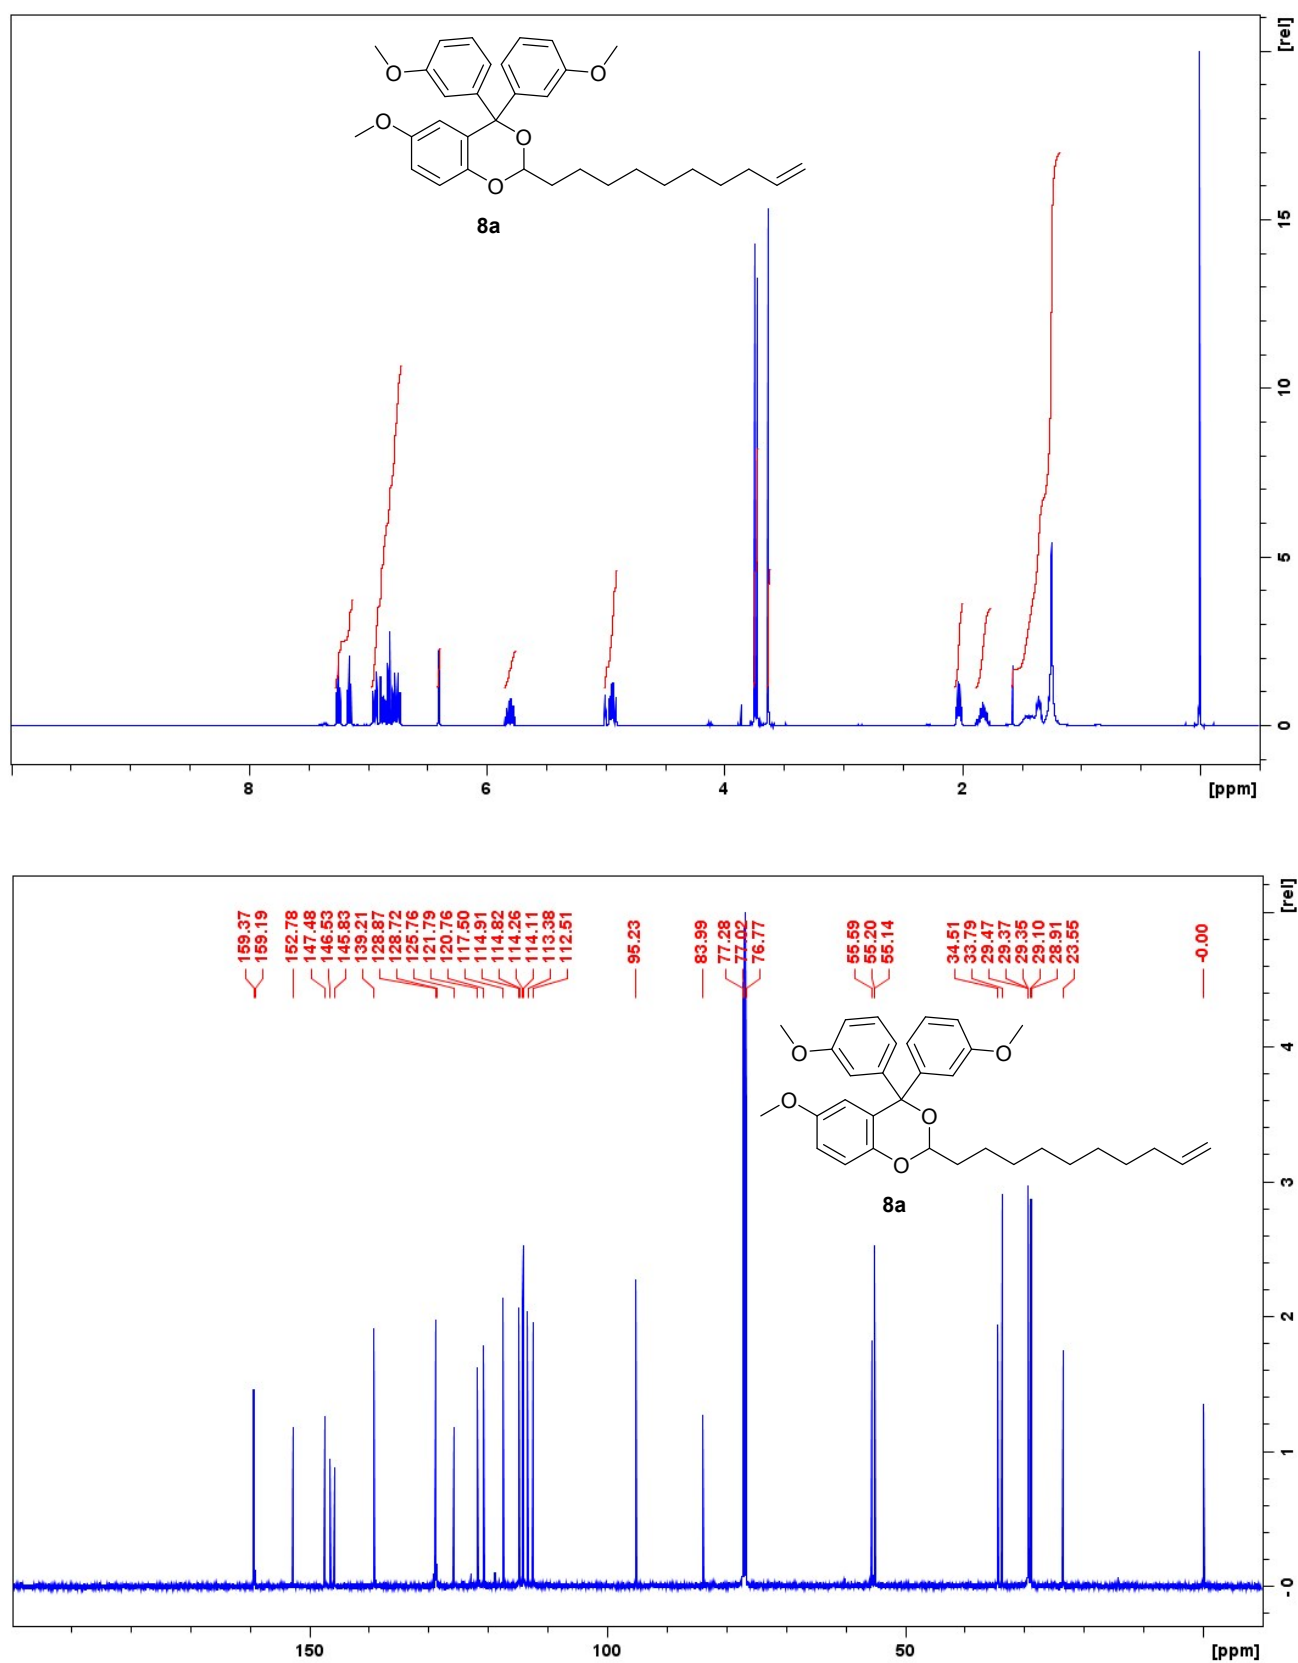

Fig. S26  $^1\text{H}$  (top) and  $^{13}\text{C}$  (bottom) NMR spectra of **8a** in  $\text{CDCl}_3$ .

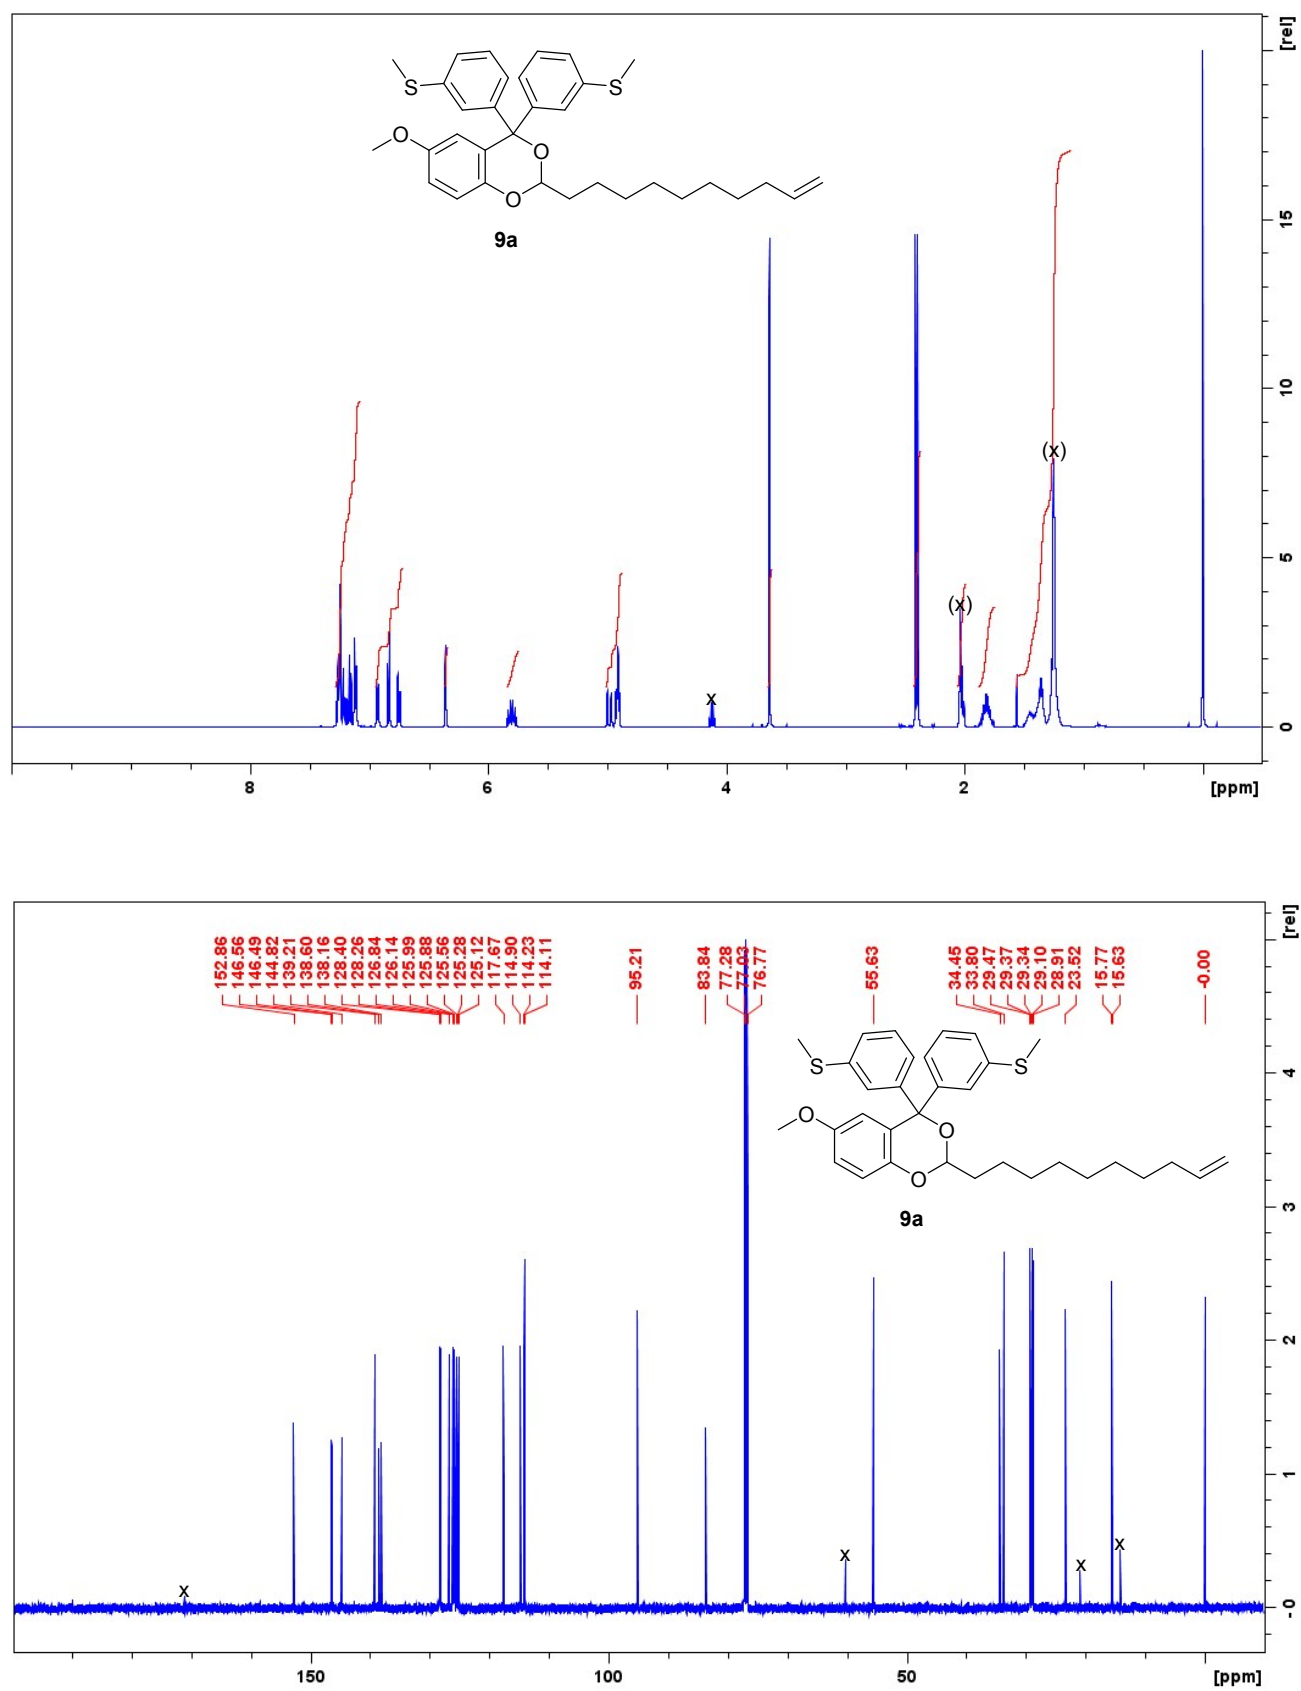

Fig. S27 <sup>1</sup>H (top) and <sup>13</sup>C (bottom) NMR spectra of **9a** in CDCl<sub>3</sub> (x = AcOEt).

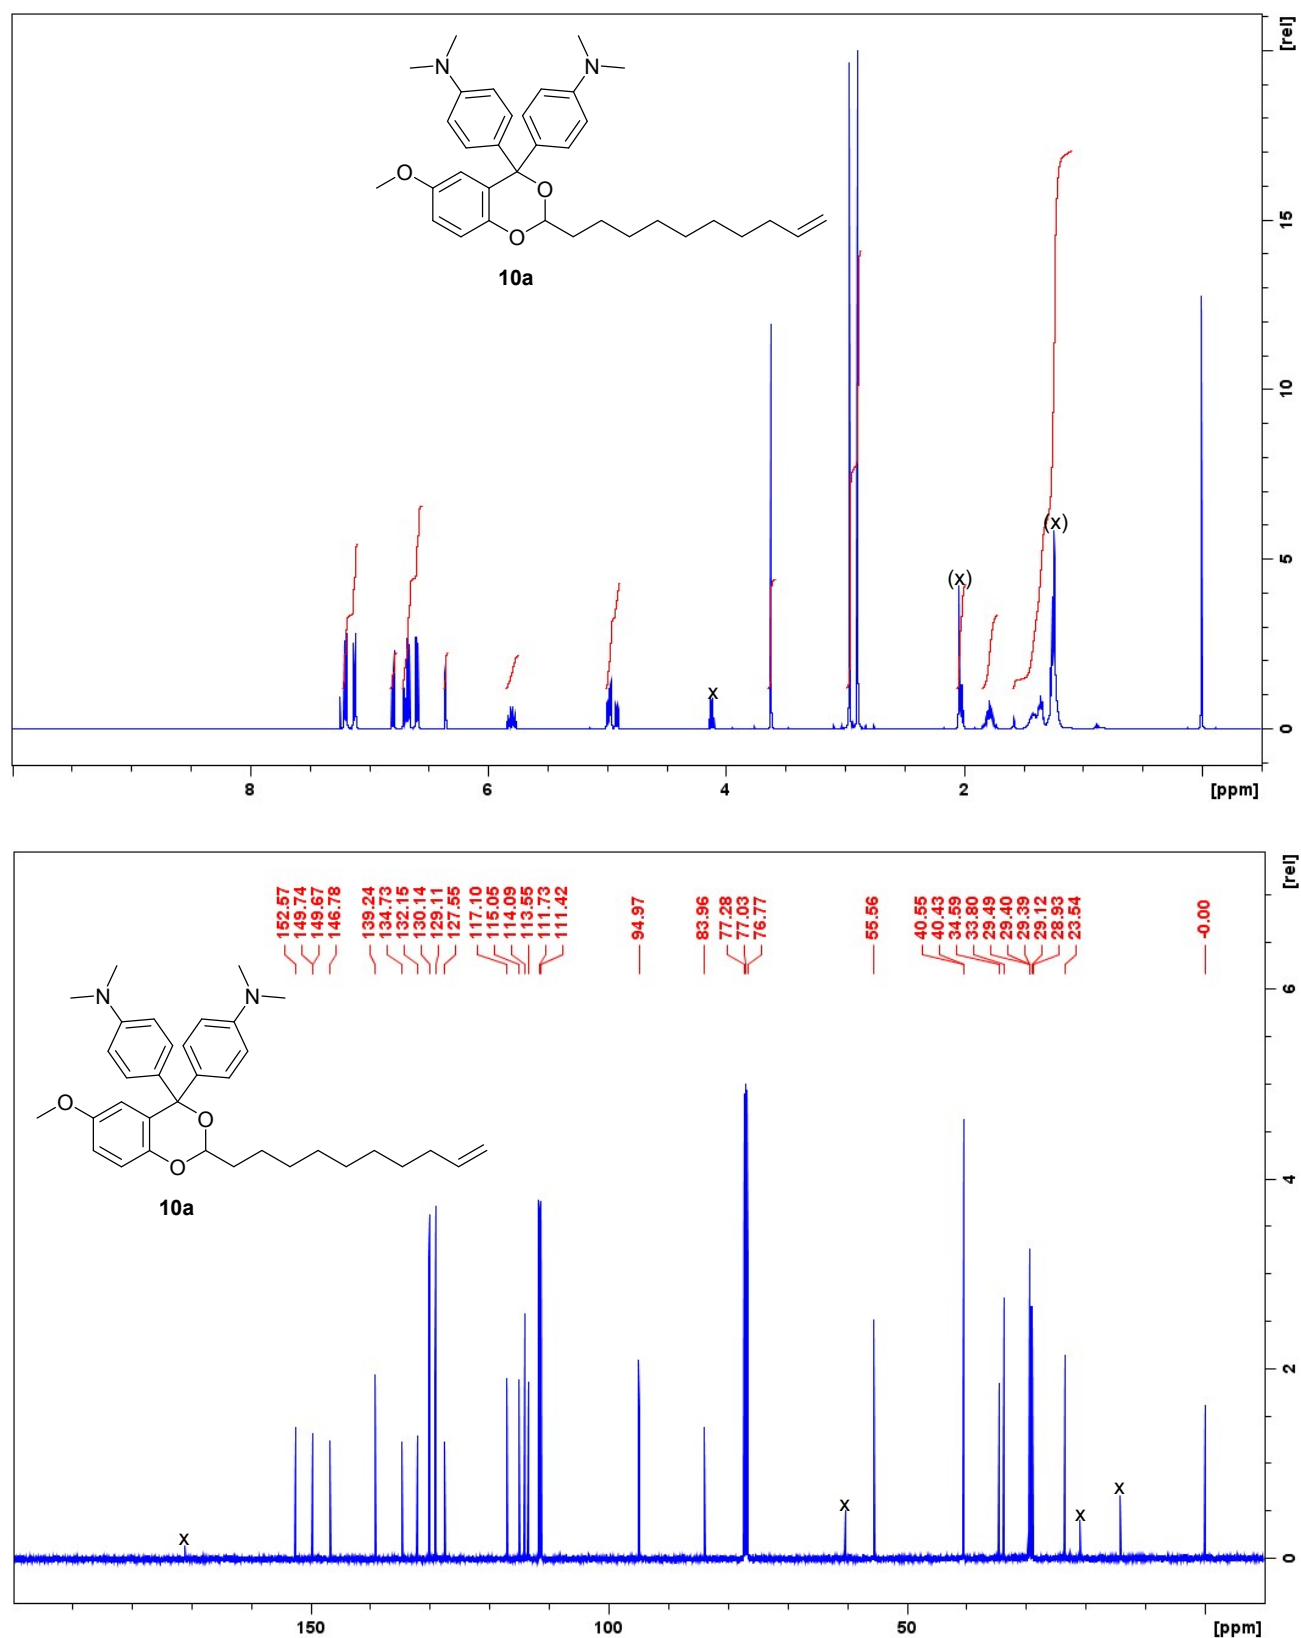

Fig. S28 <sup>1</sup>H (top) and <sup>13</sup>C (bottom) NMR spectra of **10a** in CDCl<sub>3</sub> (x = AcOEt).

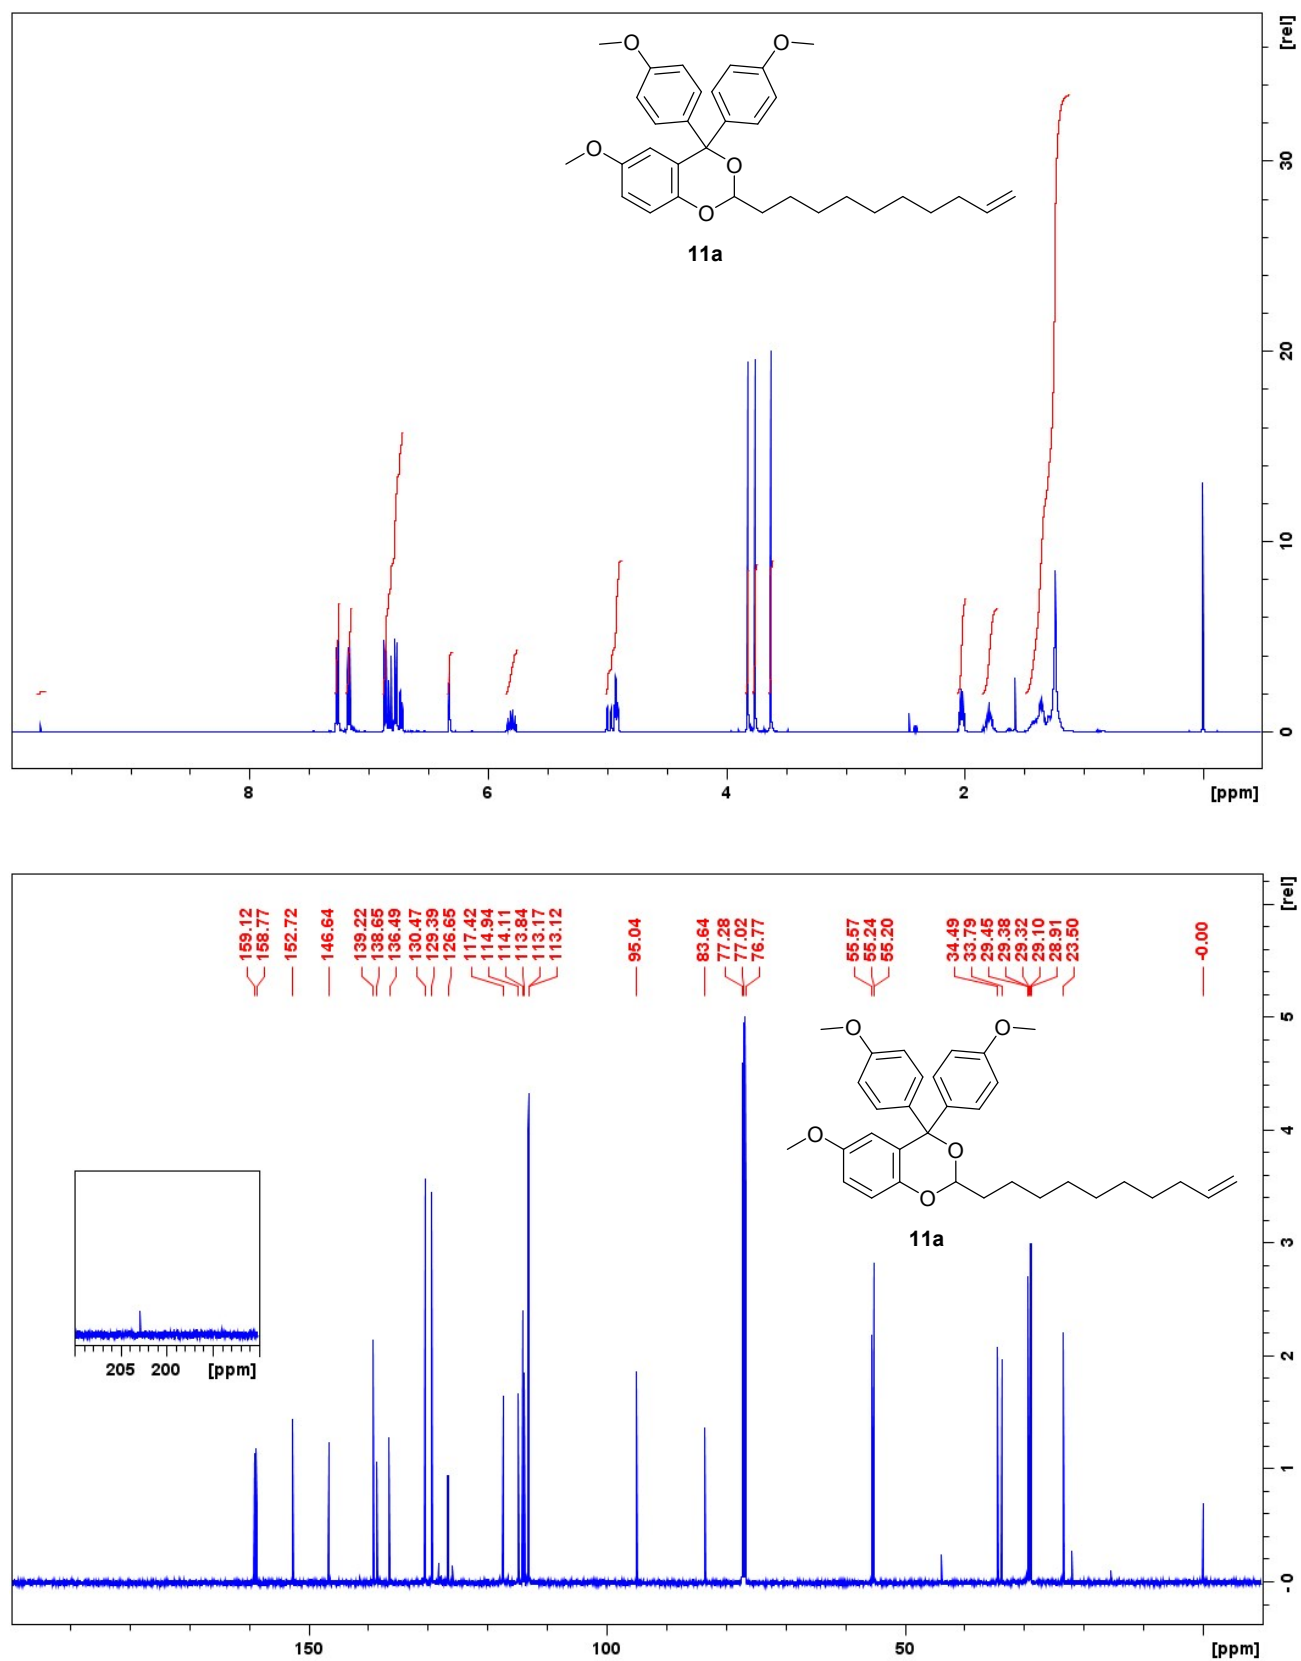

Fig. S29  $^1\text{H}$  (top) and  $^{13}\text{C}$  (bottom) NMR spectra of **11a** in  $\text{CDCl}_3$ . The sample contains *ca.* 5 mol-% of unreacted 10-undecenal.



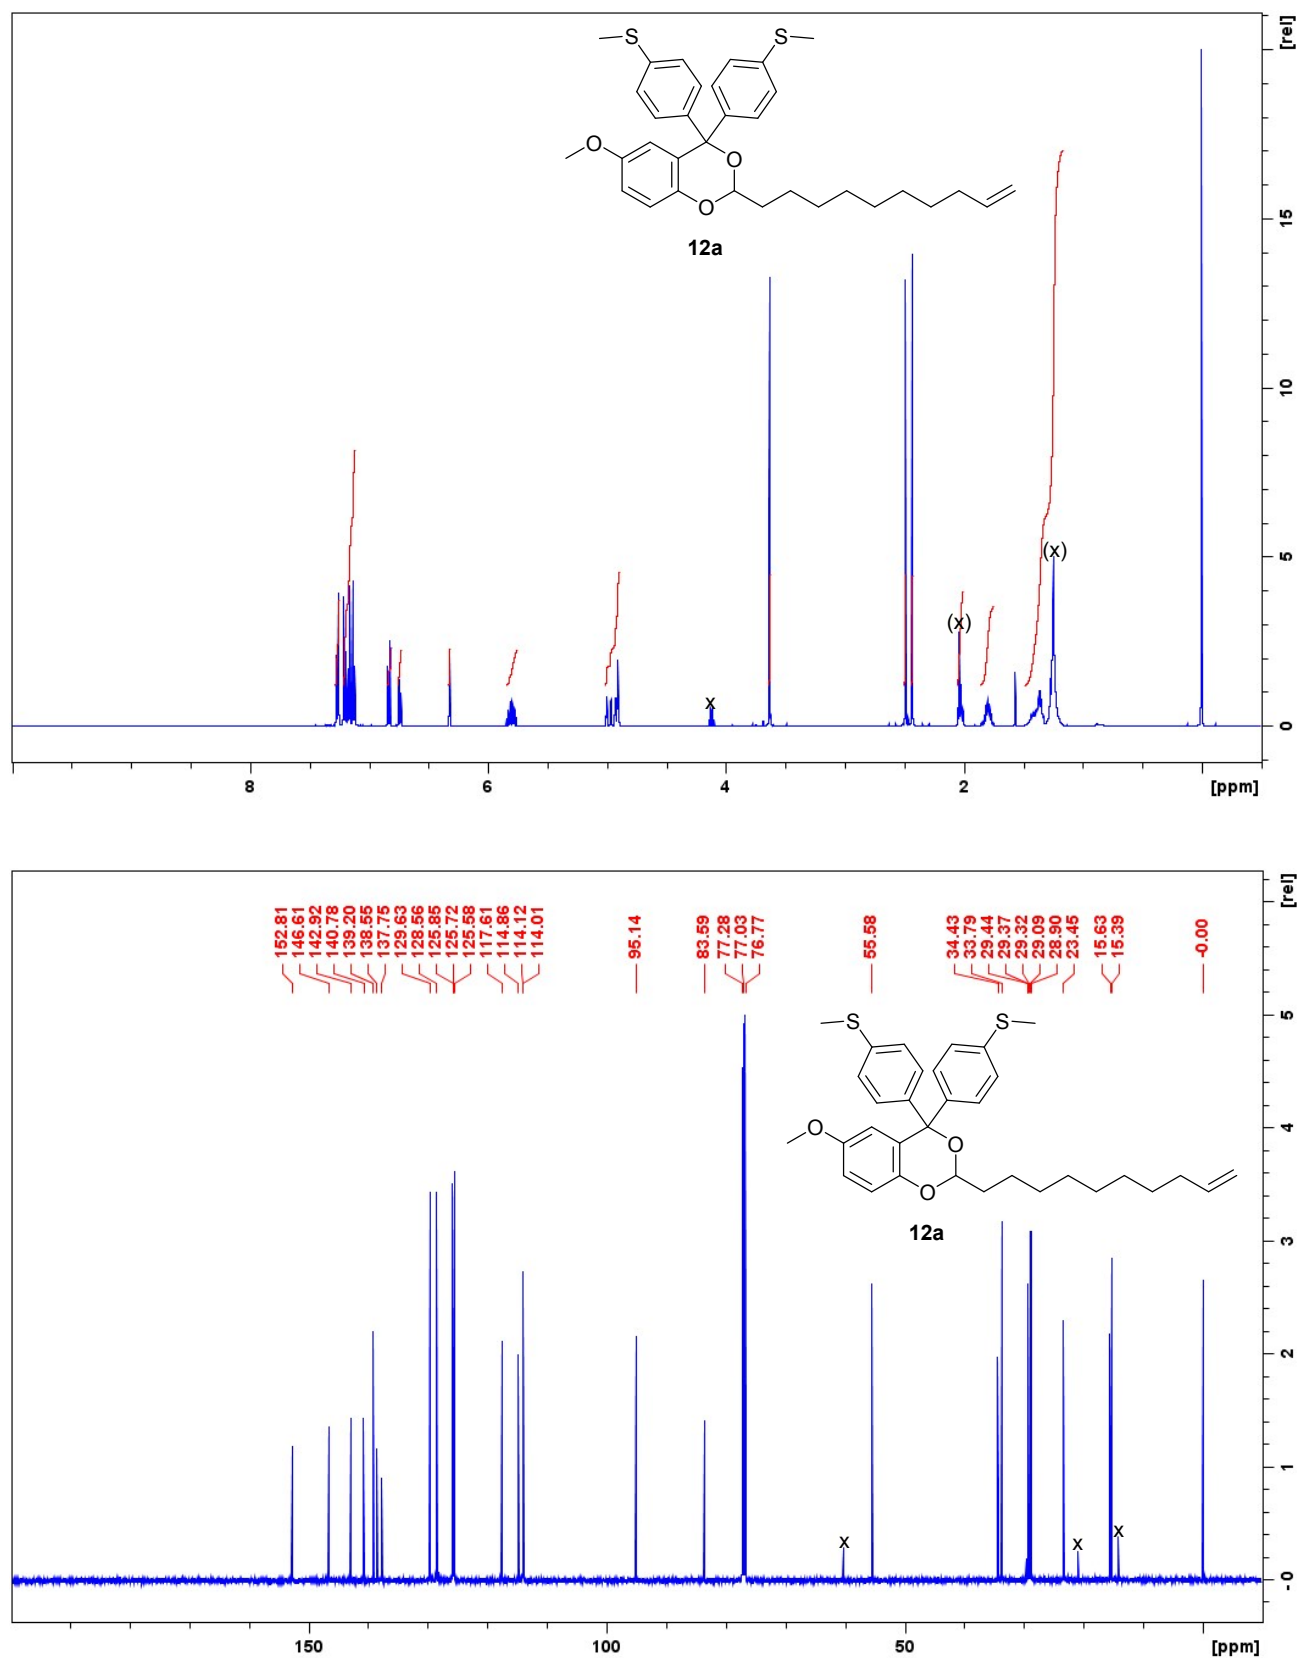

Fig. S30  $^1\text{H}$  (top) and  $^{13}\text{C}$  (bottom) NMR spectra of **12a** in  $\text{CDCl}_3$  (x = AcOEt).

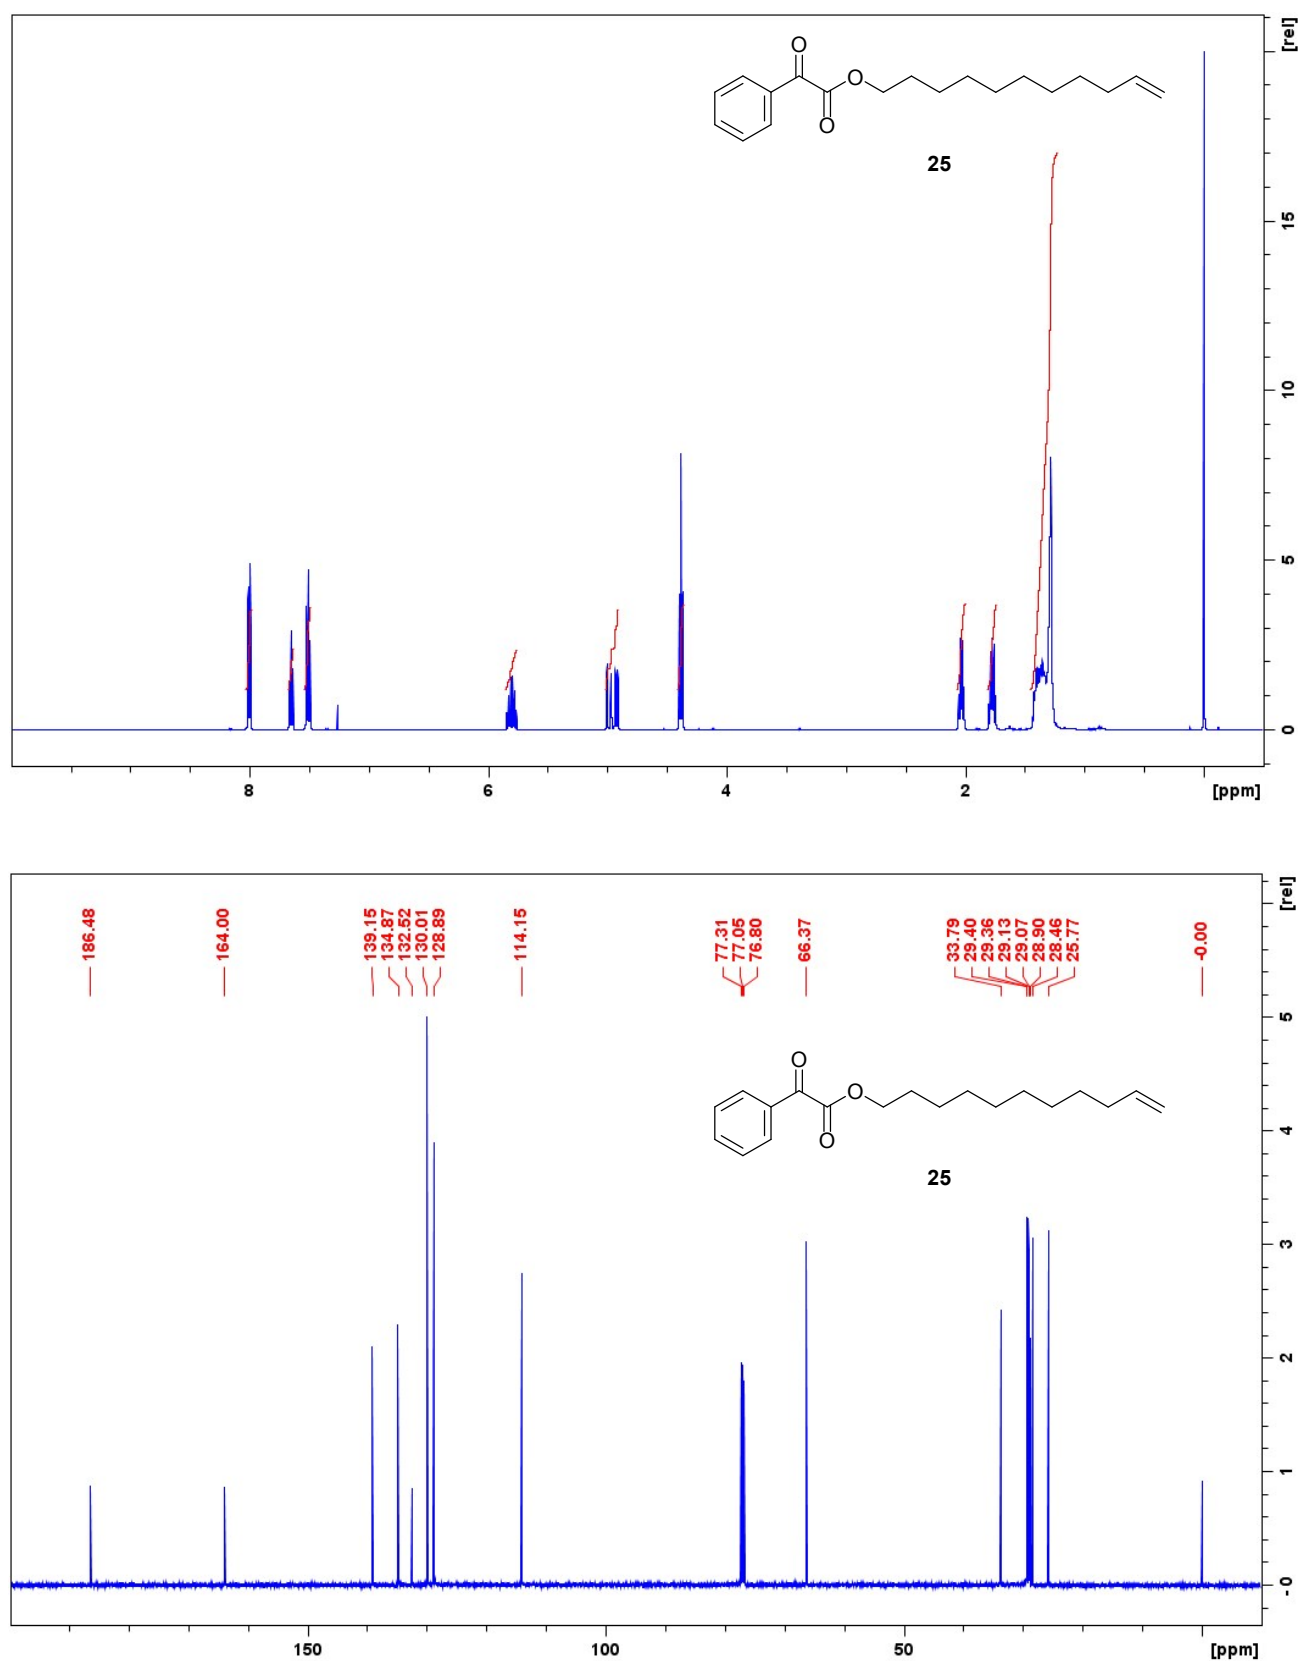

Fig. S31  $^1\text{H}$  (top) and  $^{13}\text{C}$  (bottom) NMR spectra of **25** in  $\text{CDCl}_3$ .
